# Supplementary material for: HAMA: a multiplexed LC-MS/MS assay for specificity profiling of adenylate-forming enzymes
Source: Royal Society of Chemistry journal article supplement (doi:10.1039/c9sc04222a), 2019-01-01
Supplement: c9sc04222a1.pdf [file c9sc04222a1.pdf]

## Supplementary Information

### HAMA: A multiplexed LC-MS/MS assay for specificity profiling of adenylate-forming enzymes

Aleksa Stanišić, Annika Hüsken and Hajo Kries\*

Independent Junior Research Group Biosynthetic Design of Natural Products, Leibniz Institute for Natural  
Product Research and Infection Biology e.V., Hans Knöll Institute (HKI Jena), Beutenbergstr. 11a, 07745  
Jena, Germany

# Contents

|     |                                                                                                                           |    |
|-----|---------------------------------------------------------------------------------------------------------------------------|----|
| 1   | Synthesis of amino acid hydroxamates .....                                                                                | 3  |
| 1.1 | General procedure .....                                                                                                   | 3  |
| 1.2 | Preparation and storage of standard solutions.....                                                                        | 6  |
| 1.3 | UPLC-ESI-HRMS analysis of amino acid hydroxamates .....                                                                   | 6  |
| 2   | Enzymatic product formation under competition is governed by the specificity constant $k_{\text{cat}}/K_{\text{M}}$ ..... | 7  |
| 3   | Cloning.....                                                                                                              | 8  |
| 3.1 | General cloning.....                                                                                                      | 8  |
| 3.2 | Plasmids.....                                                                                                             | 8  |
| 3.3 | Oligonucleotides used as primers .....                                                                                    | 8  |
| 4   | Protein overexpression and purification .....                                                                             | 10 |
| 4.1 | Purification protocol.....                                                                                                | 10 |
| 4.2 | SDS-PAGE of overexpressed proteins.....                                                                                   | 10 |
| 5   | MesG/hydroxylamine spectrophotometric assay .....                                                                         | 11 |
| 5.1 | Michaelis-Menten kinetics of TycA .....                                                                                   | 11 |
| 5.2 | Competitive inhibition of TycA with PheHA .....                                                                           | 11 |
| 5.3 | TycA stability in 150 mM hydroxylamine .....                                                                              | 11 |
| 6   | Multiplexed hydroxamate assay (HAMA).....                                                                                 | 12 |
| 6.1 | Reaction conditions .....                                                                                                 | 12 |
| 6.2 | UPLC-MS/MS conditions .....                                                                                               | 12 |
| 6.3 | Assay validation with TycA .....                                                                                          | 12 |
| 6.4 | Progress curve of PheHA formation with TycA .....                                                                         | 13 |
| 6.5 | Time course of hydroxamate ratios .....                                                                                   | 13 |
| 7   | DKP formation assay.....                                                                                                  | 14 |
| 7.1 | Reaction conditions .....                                                                                                 | 14 |
| 7.2 | UPLC-MS/MS conditions .....                                                                                               | 14 |
| 8   | Supplementary Tables .....                                                                                                | 15 |
| 9   | Supplementary Figures.....                                                                                                | 18 |
| 10  | Sequences of proteins used in this study .....                                                                            | 22 |
| 11  | NMR analysis and spectra .....                                                                                            | 26 |
| 12  | Supplementary References .....                                                                                            | 51 |

# 1 Synthesis of amino acid hydroxamates

## 1.1 General procedure

All reagents, amino acid methyl esters and solvents were obtained from commercial suppliers and used without further purification. Amino acid hydroxamates (XaaHAs) were synthesized by treating corresponding amino acid methyl esters with hydroxylamine according to previously published protocols.<sup>1-7</sup> Amino acid methyl ester hydrochloride (0.25-1 g) was dissolved in 10-15 mL MeOH and neutralized by careful dropwise addition of one equivalent of 0.6 M KOH in methanol while stirring on ice. The solution was filtered through a teflon 0.24  $\mu\text{m}$  filter (Labsolute) to remove the precipitated KCl. A solution of hydroxylamine (1 M, 200 mL) was prepared freshly by mixing 140 mL of 1.43 M hydroxylamine hydrochloride solution in methanol with 60 mL of 3.33 M KOH solution in methanol with vigorous stirring on ice. After 30 min, solution was filtered to remove precipitated KCl. Calculated volume of neutralized hydroxylamine solution was added to the neutralized amino acid ester solution up to a final molar ratio of ester and hydroxylamine of 1:6. Reactions were stored at 4°C without stirring to facilitate crystallization. The formation of hydroxamates was detected by formation of a colored  $\text{Fe}^{3+}$  complex with 3%  $\text{FeCl}_3$  in 0.1 M perchloric acid in ethanol. In general, hydroxamates of nonpolar amino acids crystallized spontaneously from the reaction mixture after 1-7 days, while polar ones required the addition of organic solvents. Precipitate was filtered, washed with dry methanol, dried under vacuum and stored at -20°C. Yields of hydroxamates were typically low (<20 %) due to the crystallization conditions which were not optimized.

Identity of hydroxamates was confirmed by high resolution mass spectrometry (HRMS; SI Table 3) and NMR (Section 11).

| Hydroxamate          | Synthetic procedure                                                                                                                                                                                                                                                                                    | NMR shifts of impurities                                                                                                       |
|----------------------|--------------------------------------------------------------------------------------------------------------------------------------------------------------------------------------------------------------------------------------------------------------------------------------------------------|--------------------------------------------------------------------------------------------------------------------------------|
| GlyHA <sup>1,4</sup> | Methyl ester was found to be prone to hydrolysis to free acid in alkaline hydroxylamine solution. Therefore, an incompletely neutralized hydroxylamine solution was used, which was prepared by mixing 13.9 g of hydroxylamine hydrochloride with 8.9 g KOH in 200 mL of methanol.                     | $\delta_{\text{H}}$ 4.02, s (presumably alpha proton of O-glycyl hydroxylamine, 20%)                                           |
| AlaHA <sup>1</sup>   | Reaction mixture concentrated to half the volume to facilitate crystallization. Crystallized after 2 days of storage at 4°C.                                                                                                                                                                           | $\delta_{\text{H}}$ 3.29, s (methanol)                                                                                         |
| SerHA <sup>4</sup>   | Reaction evaporated to dryness, dissolved in methanol and filtered to remove KCl. Diethylether (DET) was added with stirring until the solution turned cloudy. After 30 minutes of stirring, the solution cleared leaving resin on the flask wall. Resin was washed with DET, dried and stored at 4°C. |                                                                                                                                |
| ThrHA                | Reaction evaporated to dryness and redissolved in a small amount of methanol. Methyl tert-butyl ether (TBME) was added while stirring until the solution turned cloudy. After 15 min of stirring,                                                                                                      | $\delta_{\text{H}}$ 3.32, s (methanol)<br>$\delta_{\text{H}}$ 1.19, s; 3.20, s (MTBE)<br>$\delta_{\text{C}}$ 27.4; 50.4 (MTBE) |

|                          |                                                                                                                                                                                                                                                                                                                                                                                                                                                                                                                                                                   |                                                                                                                                                                       |
|--------------------------|-------------------------------------------------------------------------------------------------------------------------------------------------------------------------------------------------------------------------------------------------------------------------------------------------------------------------------------------------------------------------------------------------------------------------------------------------------------------------------------------------------------------------------------------------------------------|-----------------------------------------------------------------------------------------------------------------------------------------------------------------------|
|                          | ThrHA precipitated as a white, hygroscopic solid which was carefully filtered, washed with TBME and dried.                                                                                                                                                                                                                                                                                                                                                                                                                                                        |                                                                                                                                                                       |
| Cys <sub>2</sub> HA      | Cys methyl ester was found to be unstable in alkaline reaction conditions. Therefore, cystine methyl ester was employed for the synthesis of the hydroxamate. Cystine methyl ester dihydrochloride was neutralized with 2 equivalents of KOH and treated with 12 equivalents of hydroxylamine. After two days, reaction was concentrated to half volume and left to precipitate at 4°C overnight. Cysteine hydroxamate is prepared by reducing cystine hydroxamate with 3 equivalents of tris(2-carboxyethyl)phosphine hydrochloride in water at 60°C for 10 min. | $\delta_H$ 3.89, s (amino acid methyl ester)                                                                                                                          |
| ValHA <sup>1</sup>       | Precipitated from the reaction mixture after 3 days of storage at 4°C.                                                                                                                                                                                                                                                                                                                                                                                                                                                                                            |                                                                                                                                                                       |
| LeuHA <sup>5</sup>       | Precipitated from the reaction mixture after 7 days of storage at 4°C.                                                                                                                                                                                                                                                                                                                                                                                                                                                                                            | $\delta_H$ 4.01, dd (alpha proton of free amino acid, 10%)                                                                                                            |
| IleHA <sup>1,5</sup>     | Precipitated from the reaction mixture after 7 days of storage at 4°C.                                                                                                                                                                                                                                                                                                                                                                                                                                                                                            | $\delta_H$ 3.98, d (alpha proton of free amino acid, 20%)<br>$\delta_C$ 172.9 (alpha carbon of free amino acid)                                                       |
| MetHA <sup>5</sup>       | Precipitated from the reaction mixture after 2 days of storage at 4°C.                                                                                                                                                                                                                                                                                                                                                                                                                                                                                            | $\delta_H$ 4.20, dd (alpha proton of free amino acid, 6%)<br>$\delta_C$ 173.0 (alpha carbon of free amino acid)                                                       |
| ProHA*HCl                | Reaction evaporated to dryness and redissolved in a small amount of methanol while heating to 60°C. Solution acidified with concentrated HCl under vigorous stirring. DET was added to the solution until it turned cloudy. After 30 min of stirring at room temperature, the hydroxamate precipitated as translucent resin on the flask wall. Solvent was decanted, resin washed with DET, dissolved in methanol, filtered to remove KCl and dried.                                                                                                              | $\delta_H$ 1.13, d (isopropanol)<br>$\delta_H$ 1.89, s (ethyl acetate)<br>$\delta_H$ 3.32, s (methanol)<br>$\delta_H$ 4.42, dd (alpha proton of free amino acid, 12%) |
| PheHA <sup>1,2,6,7</sup> | Precipitated from the reaction mixture after 2 days of storage at 4°C.                                                                                                                                                                                                                                                                                                                                                                                                                                                                                            | $\delta_H$ 2.50, s (DMSO)<br>$\delta_C$ 39.5 (DMSO)                                                                                                                   |
| TyrHA <sup>6,7</sup>     | Methyl ester was provided as a free base, so the KOH neutralization step was omitted and the ester dissolved directly in hydroxylamine solution. Precipitated from the reaction mixture after 2 days of storage at 4°C.                                                                                                                                                                                                                                                                                                                                           | $\delta_H$ 3.30, s (methanol)<br>$\delta_C$ 50.3 (methanol)                                                                                                           |
| TrpHA <sup>6</sup>       | Reaction evaporated to dryness, redissolved in isopropanol and heated to 60°C until a rose-white                                                                                                                                                                                                                                                                                                                                                                                                                                                                  | $\delta_H$ 1.10, d; 3.96, sept (isopropanol)                                                                                                                          |

|                               |                                                                                                                                                                                                                                                                                                                                                                                                                                             |                                                                                                                                                                                   |
|-------------------------------|---------------------------------------------------------------------------------------------------------------------------------------------------------------------------------------------------------------------------------------------------------------------------------------------------------------------------------------------------------------------------------------------------------------------------------------------|-----------------------------------------------------------------------------------------------------------------------------------------------------------------------------------|
|                               | precipitate formed which was filtered, washed with isopropanol and dried.                                                                                                                                                                                                                                                                                                                                                                   | $\delta_H$ 4.35, dd (alpha proton of free amino acid, 9%)<br>$\delta_C$ 173.2 (alpha carbon of free amino acid)                                                                   |
| AspHA                         | Methyl ester provided as a free base, so the KOH neutralization step was omitted. Ester was dissolved directly in methanolic hydroxylamine solution. Asp methyl ester was found to be prone to hydrolysis to free acid in alkaline hydroxylamine solution. Therefore, an incompletely neutralized hydroxylamine solution was used, which was prepared by mixing 13.9 g of hydroxylamine hydrochloride with 8.9 g KOH in 200 mL of methanol. | $\delta_H$ 3.85, s (amino acid methyl ester)<br>$\delta_H$ 4.40, dd (alpha proton of free amino acid, 8%)<br>$\delta_H$ 4.47, dd (alpha proton of amino acid methyl ester, 3%)    |
| GluHA                         | Methyl ester was provided as a free base, so the KOH neutralization step was omitted. Ester was dissolved directly in methanolic hydroxylamine solution. Water added dropwise until complete dissolution and the reaction mixture stored at 4°C.                                                                                                                                                                                            | $\delta_H$ 3.34, s (methanol)<br>$\delta_H$ 4.40, dd (alpha proton of free amino acid, 6%)                                                                                        |
| HisHA <sup>6</sup>            | Reaction evaporated to dryness and redissolved in a small amount of methanol. Isopropanol was added to the solution until a white, extremely hygroscopic precipitate formed which was filtered, washed with isopropanol and dried.                                                                                                                                                                                                          | $\delta_H$ 1.17, d; 4.02, sept (isopropanol)<br>$\delta_H$ 3.35, s (methanol)<br>$\delta_H$ 4.40, dd (alpha proton of free amino acid, 7%)<br>$\delta_C$ 25.1; 65.6 (isopropanol) |
| LysHA                         | Precipitated from the reaction mixture after 2 days of storage at 4°C.                                                                                                                                                                                                                                                                                                                                                                      | $\delta_H$ 4.04, dd (alpha proton of O-lysyl hydroxylamine, 5%)<br>$\delta_H$ 4.48, dd (alpha proton of free amino acid, 7%)                                                      |
| ArgHA*2HCl                    | Reaction evaporated to dryness and redissolved in a small amount of methanol. Solution acidified with concentrated HCl with vigorous stirring. Isopropanol was added to the solution until a white, extremely hygroscopic precipitate formed which was filtered, washed with isopropanol and dried.                                                                                                                                         | $\delta_H$ 1.13, d; 3.98, sept (isopropanol)<br>$\delta_H$ 3.32, s (methanol)                                                                                                     |
| PipHA                         | Reaction evaporated to dryness, dissolved in methanol and filtered to remove KCl, DET was added with stirring until the solution turned cloudy. After 30 minutes of stirring, the solution cleared leaving resin on the flask wall. Resin was washed with DET, dried and stored at 4°C.                                                                                                                                                     | $\delta_H$ 3.33, s (methanol)                                                                                                                                                     |
| Phenylglycine-HA <sup>2</sup> | Precipitated from the reaction mixture after 2 days of storage at 4°C.                                                                                                                                                                                                                                                                                                                                                                      | $\delta_H$ 5.02, dd (alpha proton of O-phenylglycyl hydroxylamine, 3%)<br>$\delta_H$ 5.42, dd (alpha proton of free amino acid, 11%)                                              |

|                |                                                                                                                                                                                                                                                                                                                                                                                                                                                                     |                               |
|----------------|---------------------------------------------------------------------------------------------------------------------------------------------------------------------------------------------------------------------------------------------------------------------------------------------------------------------------------------------------------------------------------------------------------------------------------------------------------------------|-------------------------------|
| $\beta$ -PheHA | Reaction evaporated to dryness and redissolved in a small amount of methanol while heating to 60°C. Solution acidified with concentrated HCl under vigorous stirring. Diethylether (DET) was added to the solution until it turned cloudy. After 30 min of stirring at room temperature, the hydroxamate precipitated as translucent resin on the flask wall. Solvent was decanted, resin washed with DET, dissolved in methanol, filtered to remove KCl and dried. | $\delta_H$ 3.19, s (methanol) |
|----------------|---------------------------------------------------------------------------------------------------------------------------------------------------------------------------------------------------------------------------------------------------------------------------------------------------------------------------------------------------------------------------------------------------------------------------------------------------------------------|-------------------------------|

## 1.2 Preparation and storage of standard solutions

Individual hydroxamates are stored as 10 mM solutions in 20 mM HCl at -20°C. Very hygroscopic compounds (ArgHA, HisHA, ProHA, SerHA, ThrHA, PipHA,  $\beta$ -PheHA) are stored as 50 mM solutions in water at -20°C. The quantitation standard of amino acid hydroxamates is stored as acidic solution in water: 0.3 mM hydroxamates, 10 mM tris-(2-carboxyethyl) phosphine hydrochloride (TCEP) at -20°C. On the day of the analysis, the standard solution is diluted to 100  $\mu$ M final concentration in 50 mM TRIS (pH 7.5), 150 mM hydroxylamine (pH 7.5-8), 5 mM ATP. This solution is diluted with the buffer containing assay components (50 mM TRIS [pH 7.5], 150 mM hydroxylamine [pH 7.5-8], 5 mM ATP) to obtain standard solutions (0.032-100  $\mu$ M) mimicking the assay conditions. All standards are further diluted 10-fold in 95% acetonitrile + 0.1% formic acid before UPLC-MS/MS analysis (0.0032-10  $\mu$ M). Diluted hydroxamate standards are freshly prepared and used in the course of one day.

## 1.3 UPLC-ESI-HRMS analysis of amino acid hydroxamates

Exact masses of the synthetic hydroxamates were confirmed by high resolution mass spectrometry (**SI Table 3**) on a Dionex Ultimate3000 system combined with a Q-Exactive Plus mass spectrometer (Thermo Scientific) with a heated electrospray ion source (HESI). All masses were detected by ESI as  $M+H^+$  adducts in positive mode. The measurement was carried out within a mass range of  $m/z$  50 – 400.

## 2 Enzymatic product formation under competition is governed by the specificity constant $k_{\text{cat}}/K_M$

The relative product formation rates for two substrates can be derived under steady state conditions in analogy to the Michaelis-Menten equation.<sup>8</sup> The product is formed from the corresponding Michaelis complexes in an irreversible, monomolecular reaction (Eq. 1.1 and 1.2). Under the assumption that the concentrations of both Michaelis complexes remain constant, their concentration can be expressed as a function of the Michaelis constants (e.g.  $K_{M1} = [k_{-1} + k_2]/k_1$ ) and the substrate concentrations (Eq. 2.1 and 2.2). Inserting Eq. (2) into Eq. (1) results in Eq. (3) which describes the ratio of product formation rates which are proportional to the corresponding specificity constants  $k_2/K_{M1}$  and  $k_4/K_{M2}$  multiplied with the respective substrate concentrations.

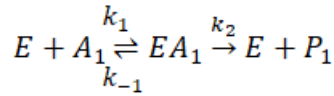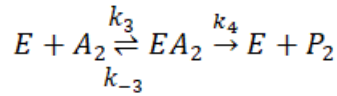

$$\frac{d[P_1]}{dt} = k_2[EA_1] = v_1 \quad (1.1)$$

$$\frac{d[P_2]}{dt} = k_4[EA_2] = v_2 \quad (1.2)$$

$$[EA_1] = \frac{K_{M2}[E]_0[A_1]}{K_{M2}[A_1] + K_{M1}[A_2] + K_{M1}K_{M2}} \quad (2.1)$$

$$[EA_2] = \frac{K_{M1}[E]_0[A_2]}{K_{M2}[A_1] + K_{M1}[A_2] + K_{M1}K_{M2}} \quad (2.2)$$

$$\frac{v_1}{v_2} = \frac{\frac{k_2}{K_{M1}}[A_1]}{\frac{k_4}{K_{M2}}[A_2]} \quad (3)$$

## 3 Cloning

### 3.1 General cloning

General cloning was carried out in *E. coli* strain NEB 5-alpha (New England Biolabs). Protein expression was carried out in *E. coli* strains NEB BL21 or HM0079.<sup>9</sup> Preparation of plasmid DNA, gel purification of DNA fragments, and purification of PCR products were performed using NucleoSpin Plasmid and Gel and PCR clean-up kits (Macherey Nagel). Purification of the genomic DNA was performed according to a published protocol.<sup>10</sup> PCRs were carried out with Q5 polymerase (New England Biolabs, Massachusetts) or Phusion High-Fidelity DNA Polymerase (New England Biolabs), according to the supplier's instructions. PCR fragments carrying vector-specific overhangs were cloned into vectors linearized by restriction digestions using the InFusion cloning kit (Takara Bio Europe). Oligonucleotide primers (Section 3.3) were made by custom synthesis and sequence confirmation of PCR amplified inserts was performed using the Mix2Seq service for Sanger sequencing (Eurofins Genomics).

### 3.2 Plasmids

pSU18 and pTrc99a vectors<sup>9</sup> were linearized with NcoI and BamHI while pOPINE<sup>11</sup> was linearized with NcoI and PmeI restriction enzymes. pSU18-TycA, pSU18-sdVGrA,<sup>12</sup> pMG211-Sfp<sup>13</sup> and pTrc99a-GrsB\_MtoL<sup>14</sup> plasmids were kindly provided by Prof. Donald Hilvert (ETH Zurich). The gene encoding the A-T didomain of the Jes-A1 module was amplified from *Pseudomonas aeruginosa* QS1027 genomic DNA<sup>15</sup> and cloned into pTrc99a. Genes encoding the SrfA-C, SrfA-A1 and SrfA-B2 modules were amplified as C-A-T constructs (SrfA-C as C-A-T-Te) by PCR from *Bacillus subtilis* 3610 genomic DNA and cloned into pTrc99a. The genes encoding all four GrsB modules were amplified as C-A-T constructs (GrsB4 as C-A-T-Te) from pTrc99a-GrsB\_MtoL. *grsB1* was subcloned into pTrc99a, while *grsB2*, *grsB3* and *grsB4* were subcloned into pSU18. Aminoacyl-tRNA synthetase genes (*hisS*, *leuS*, *metG*) were amplified from *E. coli* NEB 5-alpha genomic DNA and cloned into the pOPINE vector.

To generate mutants of sdVGrA for the directed evolution experiment, two fragments of *sdVgrsA* were amplified from pSU18-sdVGrA using mutagenic primers and cloned into pSU18-sdVGrA linearized with AflIII and SacI. The first fragment was amplified with primer sdXGrA\_f and a suitable reverse primer. The second fragment was amplified with a mutagenic forward primer, e.g. D306S\_f, and sdXGrA\_r.

### 3.3 Oligonucleotides used as primers

Overhangs for InFusion cloning are underlined.

|           |                                                                              |
|-----------|------------------------------------------------------------------------------|
| SrfA-A1_f | <u>CAA TTT CAC ACA GGA AAC AGA CCA TGT</u> TAA CGG ATG CAC AAA AAC GA        |
| SrfA-A1_r | TGG TGA TGG TGA TGA <u>GAT CTG GAT CCT TCC</u> TCT GCA AGA GCC GTA ATC       |
| SrfA-B2_f | <u>CAA TTT CAC ACA GGA AAC AGA CCA TGA</u> AGG AGG AGC AGA CGT TTG AA        |
| SrfA-B2_r | TGG TGA TGG TGA TGA <u>GAT CTG GAT CCA</u> GCA GAC GCC TCC ATA TAA GC        |
| JesA1_f   | <u>CAA TTT CAC ACA GGA AAC AGA CCA TGC</u> TCA ATG CCA GCG AAA CCG CG        |
| JesA1_r   | GGT GAT GGT GAT GAG ATC <u>TGG ATC CAA</u> TCT CGC CGC CCT TGC CAC           |
| GrsB1_f   | <u>ATT TCA CAC AGG AAA CAG ACC ATG</u> AGT ACA TTT AAA AAA GAA CAT GTT CAG G |
| GrsB1_r   | TGG TGA TGA GAT CTG GAT <u>CCC CCG</u> TTT ATA TAA TTA GAG ATT TCC TGA ATG G |
| HisS_f    | <u>AGG AGA TAT ACC ATG</u> GCA AAA AAC ATT CAA GCC A                         |
| HisS_r    | <u>GTG ATG GTG ATG TTT</u> ACC CAG TAA CGT GCG CA                            |
| MetG_f    | <u>AGG AGA TAT ACC ATG</u> ACT CAA GTC GCG AAG AAA ATT C                     |



|          |                                                                        |
|----------|------------------------------------------------------------------------|
| MetG_r   | <u>GTG ATG GTG ATG TTT</u> TTT CAC CTG ATG ACC CGG T                   |
| LeuS_f   | <u>AGG AGA TAT ACC ATG</u> CAA GAG CAA TAC CGC C                       |
| LeuS_r   | <u>GTG ATG GTG ATG TTT</u> GCC AAC GAC CAG ATT GAG G                   |
| GrsB2_f  | <u>CAA TTA AGG AGG CAG CAG ATG</u> ATT CAG CCT GTA CCA GAA CAA         |
| GrsB2_r  | <u>GTG ATG GTG ATG AGA TCT GGA</u> TCC ATC AGC AAT GTA TTG AGC TAA TG  |
| SrfA-C_f | <u>ATT TCA CAC AGG AAA CTC GAG ATG</u> AGT CAA TTT AGC AAG GAT CAG G   |
| SrfA-C_r | <u>TGG TGA TGA GAT CTG GAT CCT</u> GAA ACC GTT ACG GTT TGT GTA TTA AG  |
| GrsB3_f  | <u>CAA TTA AGG AGG CAG CAG ATG</u> ATT CAA CCT GTT ACC CCG             |
| GrsB3_r  | <u>GTG ATG GTG ATG AGA TCT GGA</u> TCC CTC CTC TAT ATA TTT AGC CAG TCC |
| GrsB4_f  | <u>CAA TTA AGG AGG CAG CAG ATG</u> GCT ATT CAG CCG GT                  |
| GrsB4_r  | <u>CTT AGT GAT GGT GAT GGT GA</u>                                      |

### Primers for mutagenesis of sdVGrSA:

|               |                                                                                                                                      |
|---------------|--------------------------------------------------------------------------------------------------------------------------------------|
| sdXgrsA_f     | <u>GAG CAT AAA GGA ATA AGT AAT CTT</u> AAG G                                                                                         |
| D306S_f       | <u>CTT CGC TCC CTA ATT GTA GGT GGA</u> AGC GCC TTG TCT CCG AAA CAC ATC                                                               |
| G243M_f       | <u>CGT ATA ATA CAG ACC GGA GCA ATT GGA</u> TTC GAT GCA CTG ACA TTT GAA GTT TTT ATG TCA<br>TTG CTG CAT GGA GCT GAA TTG                |
| N334T_f       | <u>GAA CGG TTA CGG CCC AAC AGA</u> AAC CAC CAC TTT TTC TAC ATG CTT TCT TAT TGA TAA AG                                                |
| N334T_S338A_f | <u>GAA CGG TTA CGG CCC AAC AGA</u> AAC CAC CAC TTT TGC GAC ATG CTT TCT TAT TGA TAA AGA<br>ATA TGA TGA CAA TAT TC                     |
| S338A_f       | <u>GAA CGG TTA CGG CCC AAC AGA</u> AAA CAC CAC TTT TGC GAC ATG CTT TCT TAT TGA TAA AGA<br>ATA TGA TGA CAA TAT TC                     |
| A356P_f       | <u>CTT TCT TAT TGA TAA AGA ATA TGA TGA CAA</u> TAT TCC GAT AGG GAA GCC GAT TCA AAA TAC<br>ACA AAT TTA TAT TGT CGA TGA TGA AAA TCT TC |
| D306_r        | <u>CCA CCT ACA ATT AGG GAG CGA AGG</u> C                                                                                             |
| G243_r        | <u>GCT CCG GTC TGT ATT ATA CGA</u> TCG                                                                                               |
| N334_r        | <u>CTG TTG GGC CGT AAC CGT</u> TCC                                                                                                   |
| A356_r        | <u>GTC ATC ATA TTC TTT ATC AAT AAG AAA</u> GCA TGT AG                                                                                |
| sdXgrsA_r     | <u>GCT AAC CCT TCT CCA CCA ATA CAG</u>                                                                                               |

## 4 Protein overexpression and purification

### 4.1 Purification protocol

For the overexpression of C-terminally His<sub>6</sub>-tagged holo-NRPS proteins, each overexpression plasmid was transformed into *E. coli* HM0079 with genomically integrated 4'-phosphopanthetheinyl transferase Sfp.<sup>9</sup> Overexpression of apo-TycA, Sfp and aminoacyl tRNA synthetases was done in *E. coli* BL21 strain. A 2 L flask with 500 mL of 2xYT medium supplemented with antibiotics was inoculated with 0.5 mL of an overnight culture and incubated at 37°C in a rotary shaker at 200 rpm. When the OD<sub>600</sub> reached 1, cultures were induced with 0.25 mM isopropyl-D-thiogalactoside (IPTG) and grown for another 16-20 hours at 20°C. Cells were harvested by centrifugation and the supernatant was discarded. After resuspending the cell pellet in 30 mL lysis buffer (50 mM TRIS [pH 7.4], 500 mM NaCl, 20 mM imidazole, 2 mM TCEP), 100 µL protease inhibitor mix (Sigma, P8849) were added and cells were lysed by sonication while cooling on ice. The lysate was cleared by centrifugation at 19,000 g for 30 min at 4°C and the supernatant was loaded onto a column packed with 2 mL of Ni-IDA suspension (Rotigaroze, Roth) and equilibrated with lysis buffer. After washing the column twice with 20 mL of the lysis buffer, the target protein was eluted with 4 x 0.75 mL elution buffer (50 mM TRIS [pH 7.4], 500 mM NaCl, 300 mM imidazole, 2 mM TCEP). After pooling the protein-containing fractions, they were buffer exchanged with 2-fold concentrated adenylation assay buffer (100 mM TRIS [pH 7.6], 10 mM MgCl<sub>2</sub>) on 6 mL Vivaspinn (Sartorius) filters with 10 kDa cut-off for proteins larger than 30 kDa and 30 kDa cut-off for proteins larger than 90 kDa. Glycerol was added to 10% and protein concentration adjusted to 50 µM. Samples were flash frozen in liquid nitrogen and stored at -20°C. For detailed kinetic analysis, TycA protein samples were further purified by anion exchange chromatography on an NGC Chromatography system (Bio-Rad Laboratories) using a MonoQ 5/50 GL column (GE Healthcare) and eluting with a 20-600 mM NaCl in 20 mM TRIS (pH 8) gradient. Purified protein was washed and prepared for storage as described above. Protein concentrations were determined from the absorbance at 280 nm measured in Take3 plates on an Epoch2 microplate reader (Biotek) using calculated extinction coefficients ([www.benchling.com](http://www.benchling.com)).

### 4.2 SDS-PAGE of overexpressed proteins

Purity of proteins was monitored by SDS-PAGE (SI Fig. 6) using Bolt 4-12% Bis-Tris Plus Gels (ThermoFisher Scientific) with MES-SDS running buffer (Novex). Sample load was 0.3-0.6 µg of protein per lane in Bolt LDS sample buffer and Bolt reducing agent. Triple Color Protein Standard III (Serva) was run alongside the protein samples as a size standard. The gels were run at 200 V for 22 minutes and stained with Quick Coomassie stain (Serva).

## 5 MesG/hydroxylamine spectrophotometric assay

### 5.1 Michaelis-Menten kinetics of TycA

Michaelis-Menten parameters of the adenylation reaction catalyzed by TycA were determined from kinetic data recorded with the MesG/hydroxylamine assay which was performed as described previously with minor modifications.<sup>16</sup> Reactions contained 50 mM TRIS (pH 7.6), 5 mM MgCl<sub>2</sub>, 100 μM 7-methylthioguanosine (MesG), 150 mM hydroxylamine (adjusted to pH 7.5-8 with NaOH), 5 mM ATP (A2383, Sigma), 1 mM TCEP, 0.4 U/mL inorganic pyrophosphatase (I1643, Sigma), 1 U/mL of purine nucleoside phosphorylase from microorganisms (N8264, Sigma) and varying amounts of TycA (0.025 – 1 mM) and substrates. In flat-bottom 384-well plates (781620, Brand) 100 μL reactions were started by addition of substrate and the absorbance was followed at 355 nm on a Synergy H1 (BioTek) microplate reader at 30°C. Background activity was recorded in wells containing buffer without substrate and the obtained slopes were subsequently subtracted. Each substrate concentration was measured in duplicate. Initial velocities were divided by the slope of a pyrophosphate calibration curve to obtain the pyrophosphate release rate. Initial velocities  $v_0/[E_0]$  were fit to the Michaelis-Menten equation by nonlinear regression using R version 3.4.2 (SI Fig. 2).<sup>17</sup>

### 5.2 Competitive inhibition of TycA with PheHA

For characterizing competitive inhibition of TycA by PheHA, complete L-Phe kinetic profiles were measured at varying PheHA concentrations (0.74 to 540 μM; Fig. 2B) as described for simple Michaelis-Menten kinetics (Section 5.1). Initial velocities  $v$  obtained for all combinations of substrate and inhibitor concentrations ( $[S]$  and  $[I]$ ) were fit globally to a competitive inhibition model in R using nonlinear regression and plotted using ggplot2:<sup>17</sup>

```
dat <- read.table("data.csv", sep=';', header=T)      #data input with headers S, I, v
start <- list (kcat=30, Ki=20, Km=0.02)             #starting values (Ki/μM; Km/mM)
f <- v ~ kcat * S / ((1 + I/Ki)*Km + S)             #kinetic model
m <- nls(f,dat,start=start)                          #nonlinear regression
summary(m)                                           #output of fit parameters
```

### 5.3 TycA stability in 150 mM hydroxylamine

To test the stability of TycA in the presence of 150 mM hydroxylamine, a 10 μM enzyme solution containing 50 mM TRIS (pH 7.6), 5 mM MgCl<sub>2</sub> and 150 mM hydroxylamine was incubated at room temperature for up to one hour. After the indicated time, initial adenylation velocities were measured with the preincubated enzyme and three different L-Phe concentrations using the MESG/hydroxylamine assay (SI Fig. 1).

## 6 Multiplexed hydroxamate assay (HAMA)

### 6.1 Reaction conditions

The hydroxamate formation assay was conducted at room temperature in 100  $\mu$ L volume containing 50 mM TRIS (pH 7.6), 5 mM  $MgCl_2$ , 150 mM hydroxylamine (pH 7.5-8, adjusted with NaOH), 5 mM ATP (A2383, Sigma), 1 mM TCEP and varying concentrations of enzyme. Reactions were started by adding a mix of 5 mM proteinogenic amino acids in 100 mM TRIS (pH 8) to a final concentration of 1 mM or only buffer as a control. For TycA and sdVGrA assays, L-Phe, L-Val and L-Leu were distinguished from D-Phe, D-Val and L-Ile, respectively by using enantiopure, deuterium labelled standards. Reaction times and temperatures were optimized for each protein. Reactions were quenched at different time points by diluting them 10-fold with 95% acetonitrile in water containing 0.1 % formic acid and submitted to UPLC-MS analysis. Time point  $t_0$  was obtained by quenching the enzyme containing master mix before adding amino acid substrates. To guarantee initial velocity conditions, reactions were quenched before 10% (100  $\mu$ M) of the most preferred substrate was consumed. We observed a strong impact of sample composition on HILIC separation of hydroxamates. Therefore, care had to be taken that all samples were processed in exactly the same manner without further dilutions, for instance. TycA assays were done in a biological (different enzyme batches) and technical (separate assay reactions) triplicates. Other proteins were assayed from a single protein batch in technical triplicates.

### 6.2 UPLC-MS/MS conditions

Chromatography was performed on a Waters ACQUITY H-class UPLC system (Waters) with an injection volume of 3  $\mu$ L. Water with 0.1 % formic acid (A) and acetonitrile with 0.1 % formic acid (B) were used as strong and weak eluent, respectively. Amino acid hydroxamates were separated on the ACQUITY UPLC BEH Amide column (1.7  $\mu$ m, 2.1 x 50 mm) with a linear gradient of 10-50% A over 5 min (flow rate 0.4 mL/min) followed by 4 min reequilibration. Water containing 0.1% formic acid was used as a needle wash between the samples. Data acquisition and quantitation were done using the MassLynx and TargetLynx software (version 4.1).

MS/MS analyses were performed on Xevo TQ-S micro (Waters) tandem quadrupole instrument with ESI ionisation source in positive ion mode. Nitrogen was used as a desolvation gas and argon as collision gas. The following source parameters were used: capillary voltage 1.5 kV, cone voltage 65 V, desolvation temperature 500°C, desolvation gas flow 1000 L/h. Compounds were detected via specific mass transitions recorded in multiple reaction monitoring (MRM) mode (SI Table 2).

Standard calibration solutions of hydroxamates were prepared ranging from 0.0032 to 10  $\mu$ M. In general, detection is very sensitive, limits being in the low nanomolar range. However, at such low concentrations, large loss of the linearity of the response was observed. Therefore, here we are defining limits of quantitation (LOQ) as the lowest concentrations of hydroxamate standards at which the signal response was still linear ( $R^2 > 0.95$ , deviation < 20%). The upper limit of quantification (10  $\mu$ M) is given by the requirement not to exceed 10% substrate conversion at 1 mM substrate concentration and 10-fold dilution before injection.

### 6.3 Assay validation with TycA

In order to extend the dynamic range of the assay such that the best six substrates of TycA could be measured across ca. five orders of magnitude in activity (Fig. 2A, SI Table 1), reactions were performed

with and without L-Phe. The PheHA and TrpHA concentrations were determined first by incubation of 1  $\mu$ M enzyme with complete 1 mM substrate mix (L-Phe-d5, D-Phe, L-Ile, L-Leu-d7, L-Val-d8, D-Val, L-Met, L-Tyr, L-Trp) for 3 min. In the second reaction, 1  $\mu$ M enzyme was incubated with the same substrate mix lacking L-Phe-d5 and D-Phe for 30 min to allow the accumulation of corresponding hydroxamates up to measurable levels.  $\log([XaaHA]/[TrpHA])$  ratios were calculated to allow comparison between both reactions.

#### 6.4 Progress curve of PheHA formation with TycA

A hydroxamate assay reaction with 200 nM TycA in the presence of 1 mM proteinogenic amino acid mix was allowed to run for up to 20 minutes. Reactions were quenched at seven time points and the concentration of PheHA measured (SI Fig. 5).

#### 6.5 Time course of hydroxamate ratios

After a prolonged reaction time, competitive product inhibition will decrease the rate of hydroxamate accumulation,<sup>9</sup> but should not change the ratio of products. Therefore, specificity profiles should remain unaffected. We tested this hypothesis by monitoring hydroxamate ratios over time in the reaction of 1  $\mu$ M TycA with 1 mM substrates (SI Fig. 4).

## 7 DKP formation assay

### 7.1 Reaction conditions

The diketopiperazine (DKP) formation assay was performed in 150  $\mu$ L volume with 5 mM ATP, 1 mM TCEP, 5  $\mu$ M GrsB1 and either 5  $\mu$ M sdVGrA or a mutant thereof in peptide formation assay buffer (40 mM HEPES, 10 mM  $MgCl_2$ , 75 mM NaCl, pH 8.0). The reaction was started by addition of L-Val and L-Pro (1 mM each). The resulting solution was incubated at 37 °C and quenched after 3 h by heat denaturation at 95 °C for 3 min. Denatured proteins were precipitated by centrifugation and the supernatant analysed by UPLC-MS/MS.

### 7.2 UPLC-MS/MS conditions

Chromatography was performed on a Waters ACQUITY H-class UPLC system (Waters) with an injection volume of 2  $\mu$ L. Methanol (A) and water with 0.1 % formic acid (B) were used as strong and weak eluent, respectively. Diketopiperazines were separated on the ACQUITY UPLC BEH C18 column (1.7  $\mu$ m, 2.1 x 50 mm) with a linear gradient of 20-60% A over 1.5 min (flow rate 0.5 mL/min) followed by 1 min reequilibration. Acetonitrile was used as a needle wash between the samples. Data acquisition and quantitation were done using the MassLynx and TargetLynx software (version 4.1).

MS/MS analyses were performed on a Xevo TQ-S micro (Waters) tandem quadrupole instrument with ESI ionisation source in positive ion mode. Nitrogen was used as desolvation gas and argon as collision gas. The following source parameters were used: capillary voltage 0.5 kV, cone voltage 4 V, desolvation temperature 600°C, desolvation gas flow 1000 L/h. Val-Pro-DKP was detected via the 197.09>69.95 transition, recorded in multiple reaction monitoring (MRM) mode. Standard calibration solutions of Val-Pro-DKP were prepared ranging from 0.0006 to 10  $\mu$ M.

## 8 Supplementary Tables

**SI Table 1.** Comparison of kinetic data.\*

|           | PP <sub>i</sub> exchange                                                          | MesG                                                                | HAMA (μM)     |               |
|-----------|-----------------------------------------------------------------------------------|---------------------------------------------------------------------|---------------|---------------|
| Substrate | $k_{\text{cat}}/K_{\text{M}}$ (mM <sup>-1</sup> min <sup>-1</sup> ) <sup>19</sup> | $k_{\text{cat}}/K_{\text{M}}$ (mM <sup>-1</sup> min <sup>-1</sup> ) | 3 min         | 30 min        |
| L-Phe     | 9900 ± 300                                                                        | 1600 ± 85                                                           | 96 ± 12       | NA            |
| D-Phe     | 4700 ± 400                                                                        | 2400 ± 120                                                          | 116 ± 15      | NA            |
| L-Tyr     | 12.2 ± 1.4                                                                        | 1.7 ± 0.3                                                           | 0.029 ± 0.002 | 12.7 ± 1.3    |
| L-Trp     | 5.4 ± 0.5                                                                         | 3.5 ± 0.3                                                           | 0.13 ± 0.01   | 43.0 ± 3.0    |
| L-Met     | 2.1 ± 0.2                                                                         | 3.6 ± 0.8                                                           | 0.13 ± 0.009  | 49.0 ± 4.3    |
| L-Leu     | 1.26 ± 0.1                                                                        | 1.6 ± 0.1                                                           | ND            | 10.9 ± 0.8    |
| L-Val     | 0.13 ± 0.008                                                                      | 0.12 ± 0.01                                                         | ND            | 0.045 ± 0.008 |

\*NA: Not applicable; ND: Not detectable

**SI Table 2.** Acquisition parameters for hydroxamate quantification and limits of quantification (LOQs).

| Compound    | Parent (m/z) | Cone Voltage (V) | Daughter (m/z) | Collision Energy (V) | LOQ (μM) |
|-------------|--------------|------------------|----------------|----------------------|----------|
| AlaHA       | 104.90       | 18               | 43.90          | 8                    | 0.08     |
| ArgHA       | 190.02       | 14               | 69.94          | 16                   | 0.016    |
| AspHA       | 148.95       | 32               | 87.92          | 10                   | 0.08     |
| CysHA       | 136.87       | 28               | 75.87          | 12                   | 0.0032   |
| GluHA       | 163.03       | 24               | 83.95          | 18                   | 0.016    |
| GlyHA       | 90.82        | 34               | 29.94          | 8                    | 0.4      |
| HisHA       | 171.05       | 22               | 109.92         | 10                   | 0.016    |
| IleHA       | 147.01       | 28               | 85.97          | 8                    | 0.0032   |
| LysHA       | 162.02       | 20               | 83.94          | 18                   | 0.08     |
| MetHA       | 165.03       | 26               | 103.88         | 8                    | 0.0032   |
| D-PheHA     | 180.99       | 30               | 119.94         | 10                   | 0.0032   |
| ProHA       | 130.97       | 24               | 69.96          | 12                   | 0.4      |
| ThrHA       | 134.91       | 26               | 73.97          | 8                    | 0.0032   |
| TrpHA       | 219.94       | 30               | 167.00         | 16                   | 0.0032   |
| TyrHA       | 196.98       | 30               | 135.95         | 12                   | 0.0032   |
| D-ValHA     | 132.87       | 22               | 71.91          | 10                   | 0.016    |
| L-Val-d8-HA | 140.92       | 22               | 79.96          | 10                   | 0.016    |
| L-Phe-d5-HA | 186.03       | 30               | 124.97         | 10                   | 0.0032   |
| L-Leu-d7-HA | 154.05       | 30               | 93.01          | 10                   | 0.0032   |



**SI Table 3.** HRMS of amino acid hydroxamates.

| Name              | Molecular formula | Expected (m/z) | Found (m/z) | Delta (ppm) |
|-------------------|-------------------|----------------|-------------|-------------|
| AlaHA             | C3H9N2O2+         | 105.0659       | 105.0660    | 1.0         |
| ArgHA             | C6H16N5O2+        | 190.1299       | 190.1296    | 1.6         |
| AspHA             | C4H9N2O4+         | 149.0557       | 149.0555    | 1.3         |
| CysHA             | C3H9N2O2S+        | 137.0379       | 137.0378    | 0.7         |
| GluHA             | C5H11N2O4+        | 163.0713       | 163.0711    | 1.2         |
| GlyHA             | C2H7N2O2+         | 91.0502        | 91.0505     | 3.3         |
| HisHA             | C6H11N4O2+        | 171.0877       | 171.0874    | 1.8         |
| IleHA             | C6H15N2O2+        | 147.1128       | 147.1126    | 1.4         |
| LeuHA             | C6H15N2O2+        | 147.1128       | 147.1126    | 1.4         |
| LysHA             | C6H16N3O2+        | 162.1237       | 162.1235    | 1.2         |
| MetHA             | C5H13N2O2S+       | 165.0692       | 165.0690    | 1.2         |
| PheHA             | C9H13N2O2+        | 181.0972       | 181.0970    | 1.1         |
| $\beta$ -PheHA    | C9H13N2O2+        | 181.0972       | 181.0968    | 2.2         |
| Phenylglycine HA  | C8H11N2O2+        | 167.0815       | 167.0813    | 1.2         |
| Pipecolic acid HA | C6H13N2O2+        | 145.0972       | 145.0969    | 2.1         |
| ProHA             | C5H11N2O2+        | 131.0815       | 131.0814    | 0.8         |
| SerHA             | C3H9N2O3+         | 121.0608       | 121.0608    | 0.0         |
| ThrHA             | C4H11N2O3+        | 135.0764       | 135.0763    | 0.7         |
| TrpHA             | C11H14N3O2+       | 220.1081       | 220.1079    | 0.9         |
| TyrHA             | C9H13N2O3+        | 197.0921       | 197.0919    | 1.0         |
| ValHA             | C5H13N2O2+        | 133.0972       | 133.0971    | 0.8         |

## 9 Supplementary Figures

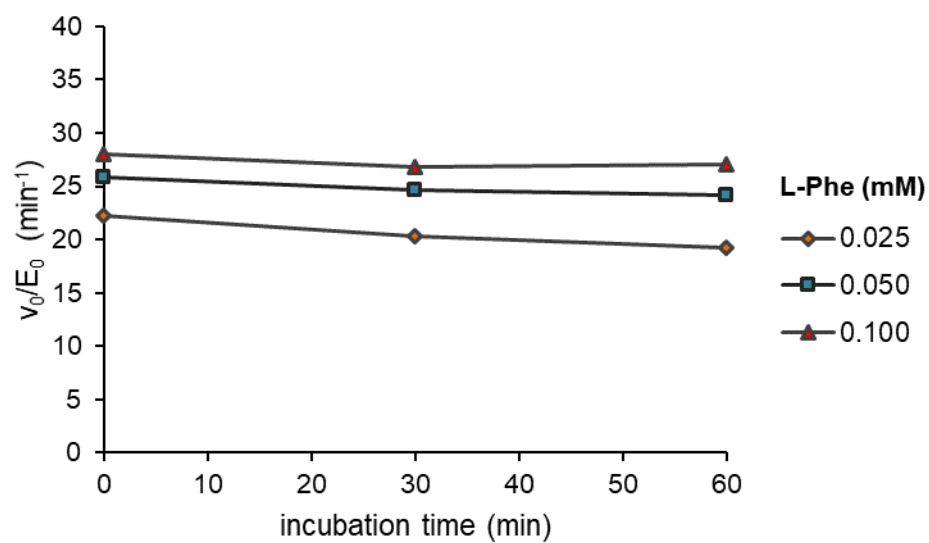

**SI Fig. 1.** Stability of TycA in hydroxylamine monitored with the MESG/hydroxylamine assay.

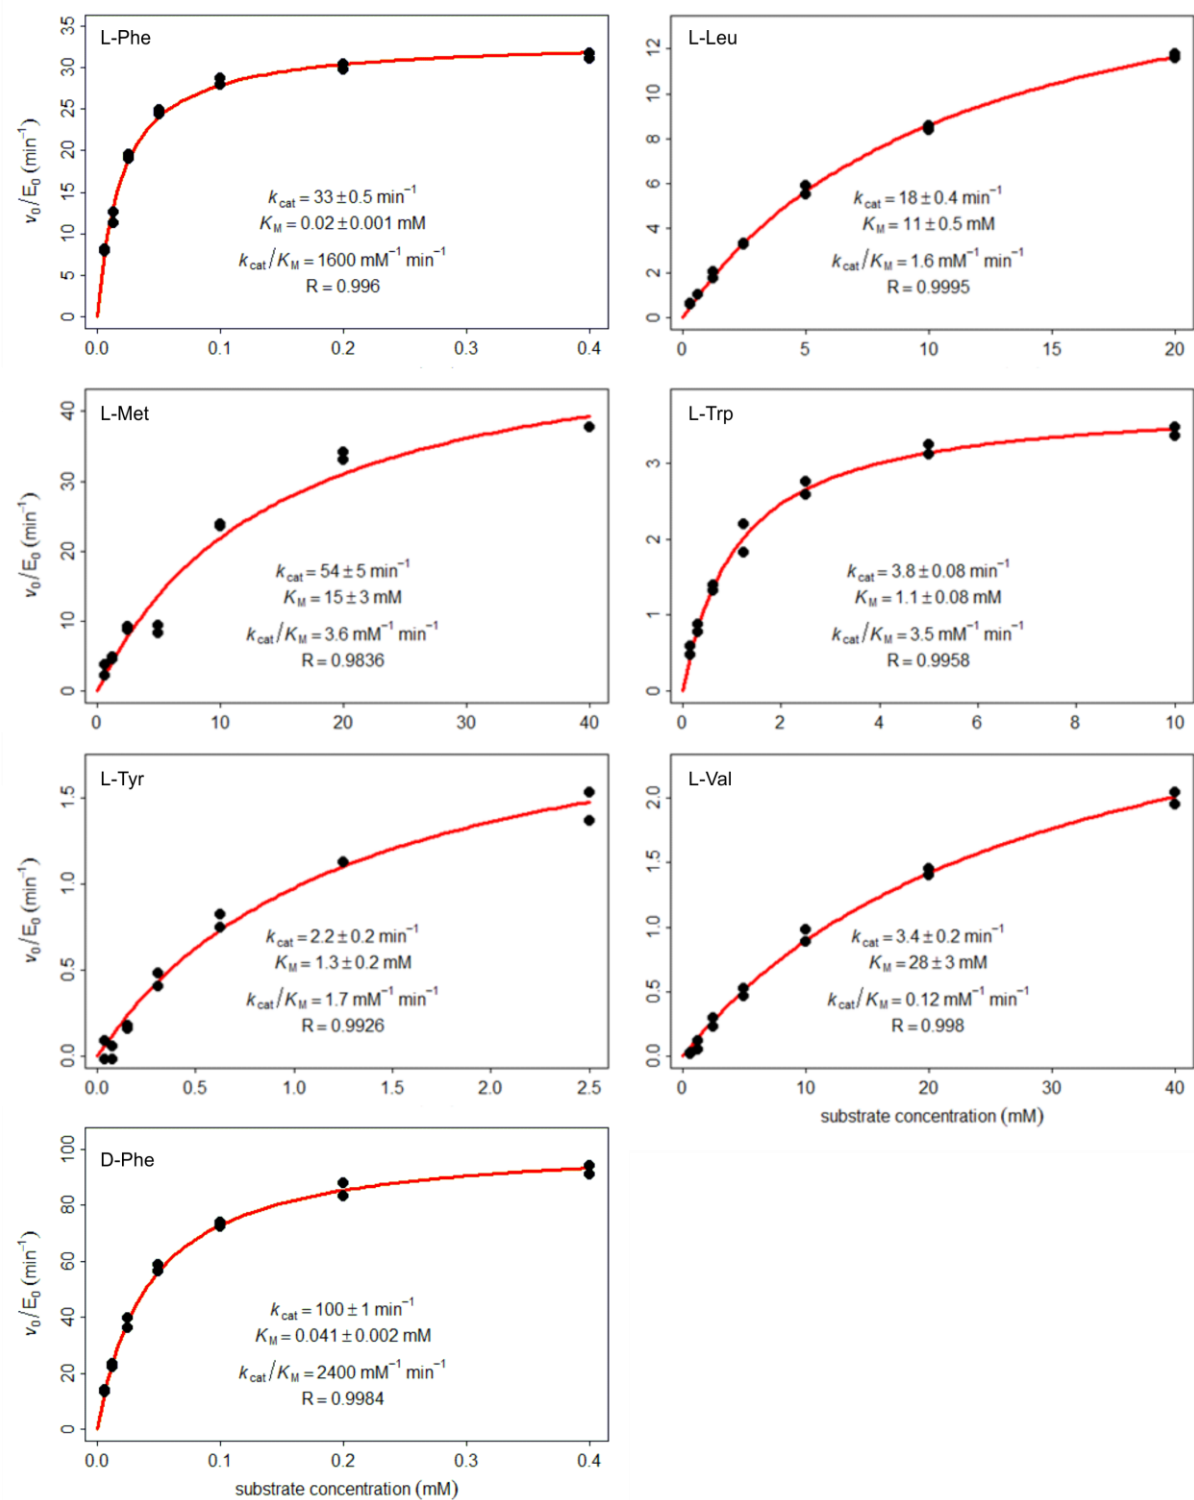

SI Fig. 2. Michaelis-Menten kinetics of TyCA.

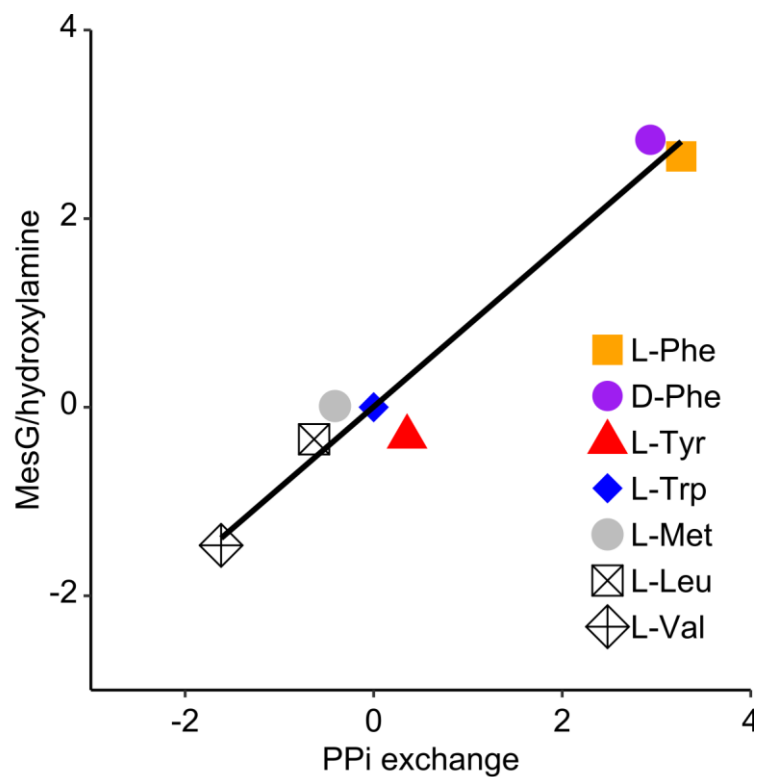

**SI Fig. 3.** Comparison of Tyca parameters measured with MesG/hydroxylamine assay and PPi exchange assay. Data are plotted as  $\log([k_{\text{cat}}/K_M]_{\text{Xaa}} / [k_{\text{cat}}/K_M]_{\text{Trp}})$ . Slope:  $0.86 \pm 0.08$ ;  $R^2 = 0.957$ .

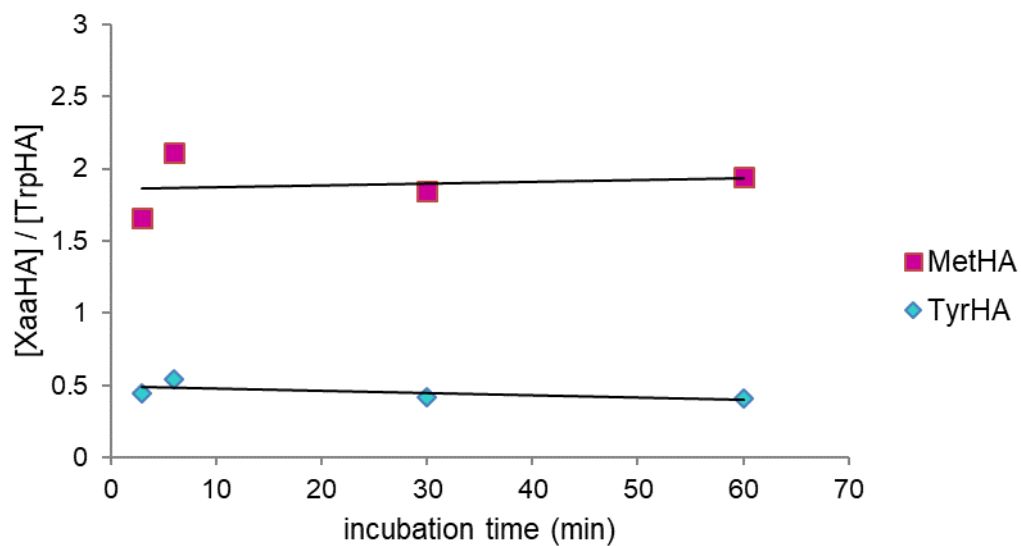

**SI Fig. 4.** Ratios of hydroxamate concentrations during the course of a HAMA assay with Tyca. The assay was conducted with the proteinogenic amino acid mix but only MetHA and TyrHA remained in the initial velocity range (<10% conversion) for the entire reaction time.

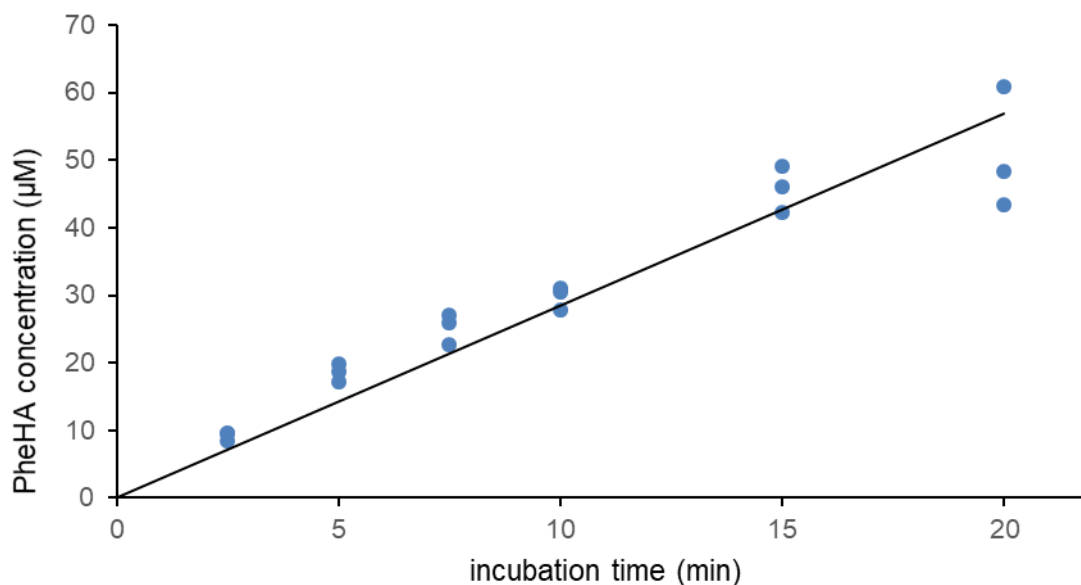

**SI Fig. 5.** Progress curve of PheHA formation catalysed by TycA. A linear fit indicates a  $k_{\text{obs}}$  of  $14.2 \pm 0.5 \text{ min}^{-1}$ . The 3-fold lower turnover rate compared to the  $k_{\text{cat}}$  determined for pure L-Phe ( $43 \text{ min}^{-1}$ ; SI Fig. 2) might be explained by competition with alternative substrates. According to the parameters determined for competitive inhibition (Fig. 2B), the apparent deviation from linearity is not caused by PheHA.

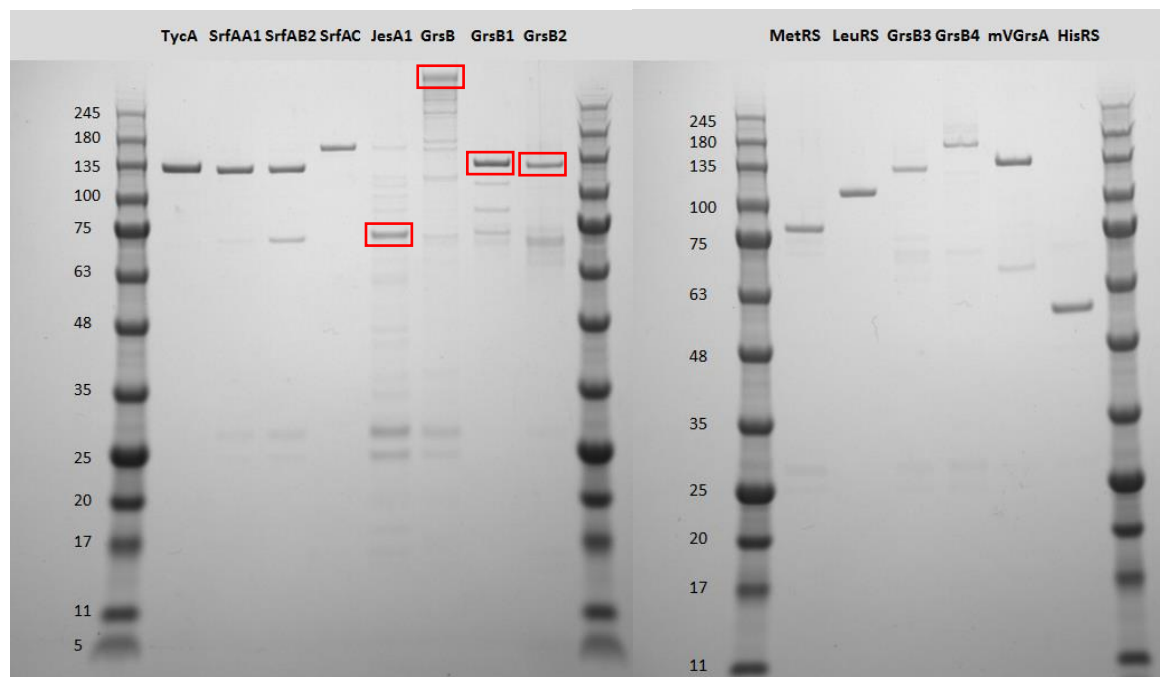

**SI Fig. 6.** SDS-PAGE of purified proteins. Expected molecular weight of proteins (kDa): TycA (123.6), SrfAA1 (117.1), SrfAB2 (117.0), SrfAC (145.1), JesA1 (67.8), GrsB (510.0), GrsB1 (122.3), GrsB2 (117.9), MetRS (77.2), LeuRS (98.2), GrsB3 (119.3), GrsB4 (152.0), sdVGrSA (128.5), HisRS (48.0). Where ambiguous, the protein of interest is labeled with a red rectangle.

## 10 Sequences of proteins used in this study

### TycA

MVANQANLIDNKRELEQHALVPYAQGKSIHQLFEEQAEAFDPDRVAIVFENRRLSYQELNRKANQLARALLEKGVQTDIVGVMMMEKS  
IENVIAILAVLKAGGAYVPIDIEYPRDRIQYILQDSQTKIVLTQKSVSQLVHDVGYSGEVVVLDEEQLDARETANLHQPSKPTDLAY  
VIYTSGETTGKPKGTMLEHKGIANLQSFFQNSFVTEQDRIGLFASMSFDASVWEMFMALLSGASLYILSKQTIHDFAAFEHYLSENE  
LTIITLPTTYLTHLTPERITSLRIMITAGSASSAPLVNKKWKDLRYINAYGPTETSICATIWEAPSNQLSVQSVPIGKPIQNTHIYI  
VNEDLQLLPTGSEGELCIGGVGLARGYWNRPDLTAEKFVDNPFVPGKMYRTGDLAKWLTDTGTIEFLGRIDHQVKIRGHRIELGEIE  
SVLLAHEHITEAVVIAREDQHAGQYLCAYYISQQEATPAQLRDYAAQKLPAYMLPSYFVKLDKMPLTPNDKIDRKALPEPDLTANQS  
QAAYHPPRTETESILVSIWQNVLGIEKIGIRDNFYSLGGDSIQAIQVVARLHSYQLKLETKDLLNYPTIEQVALFVKSTTRKSDQGI  
IAGNVPLTPIQKWFFGKNFTNTGHWNQSSVLYRPEGFDPKVIQSVMDKIEHHDALRMVYQHENGNNVQHNRGLGGQLYDFFSYNLT  
AQPDVQQAIEAETQRLHSSMNLQEGPLVKVALFQTLHGDLFLAIHHLVVDGISWRILFEDLATGYAQUALAGQAI SLPEKTD SFQSW  
SQWLQEYANEADLLSEIPYWESLESQAKNVSLPKDYEVTDCKQKSVRNMRIRLHPEETEQLLKHANQAYQTEINDLLLAALGLAFAE  
WSKLAQIVIHLEGHGREDDIEQANVARTVGWFTSQYPVLLDLKQTAPLSDYIKLTENMRKIPRKGIGYDILKHVTLPENRGSLSFR  
VQPEVTFNYLGQFDADMRTLELTRSPYSGGNTLGADGKNNLSEPEVYTALNITGLIEGGELVLTFSYSSEQYREESIQQLSQSYQK  
HLLAIIAHCTEKKEVERTPSDFS VKGLQMEEMDDIFELLANTLRGSRSHHHHHH

### SrfAA1

MLTDAQKRIWYTEKFYPHTSISNLAGIGKLVSADAIDYVLVEQAIQEFIRNDAMRLRLRLDENGEVPQYI SEYRPVDIKHTD TTED  
PNAIEFISQWSREETKKPLPLYDCDLFRFSLFTIKENEVWFYANVHHVISDGISMILGNAIMHIYLELASGETKEGISHSFIDHV  
LSEQEYAAQSKRFEKDKAFWNKQFESVPELVSLKRNASAGGSAPDAERFSKDVPEALHQQILSFCEANKVSVLSVFSLLAAYLYRVSG  
QNDVVTGTFMGNRTNAKEKQMLGMFVSTVPLRTNIDGGQAFSEFVKDRMKDLMKTLRHQKYPYNLLINDLRETKSSLTKLFTVSLEY  
QVMQWQKEEDLAFLEPIFSGSGLNDVSIHVKDRWDTGKLTIDFYRTDLFSREEINMICERMITMLLENALTHEPTIDELTLISDA  
EKEKLLARAGGKSVSYRKDMTIPELFQEKAEELSDHPAVVFEDRTLSYRTLHEQSARIANVLKQKGVGPDS PVAVLIERSERMITAI  
MGILKAGGAYVPIDPGFPAERI QYILED CGADFI LTESKVAPEADAELIDLDQAI EEGAEESLNADVNARNLAYIIYTS GTTGRPK  
GVMIEHRQVHHLVESLQQTIIYQSGSQTLRMALLAPFHFDASVKQIFASLLLGQ TLYIVPKKTVTNGAALTAYRKNSIEATDGT PAH  
LQMLAAAGDFEGLKLKHM LIGGELSSV VADKLLKLFKEAGTAPRLTNVYGPTETCVDASVHPVIPENAVQSA YVPIGKALGNRLY  
ILDQKGRLLQPEGVAGELYIAGDGVGRGYLHLP ELTEEFKFLQDPFVPGDRMYRTGDVVRWLPDGTIEYLGREDDQVKVRGYRIELGEI  
EAVIQQAPDVA KAVVLARPDEQGNLEVCAYV VQKPGSEFAPAGLREHAARQLPDYMPAYFTEVTEIPLTPSGKVDRRKLFALEVKA  
VSGTAYTAPRNETEKAIAAIWQDVLNVEKAGIFDNFFETGGHSLKAMTLLTKIHKETGIEIPLQFLFEHPTITALAEEGSRSHHHHH  
H

### SrfAB2

MKEEQTFEPIRQASYQQHYVPSPAQRMYIILNQLGQANTSYNVPAVLLLEGEVDKDRLENAIQQLINRHEILRTSFD MIDGEVVQTV  
HKNISFQLEAAKGREEDAE EIIKAFVQPFELNRAPLVRSKLVQLEEKRHLLIDMHHIITDGSSTGILIGDLAKIYQGADLELPQIH  
YKDYAVVWHKEQTN YQKDEEYWL DVFKGELPILDL PADFERPAERSFAGERVMFGLDKQITAIQIKSLMAETDTTMYMFLLA AFNVLLS  
KYASQDDIIVGSPTAGRTHPDLQGVPGMFVNTVALRTAPAGDKTFAQFLEEVKTASLQAFEHQSYPLEELIEKLPLTRDTSRSP LFS  
VMFNMQNMEIPSLRLGDLKISSYMLHHVAKFDLSLEAVEREDD IGLSFDYATALFKDETIRWRSRHFVNIKAAAANPNVRLSDVD  
LLSSAETAALLEERHMTQITEATFAALFEKQAQQT PDHSAVKAGGNLLTYRELDEQANQLAHLRAQGAGNEDIVAIVMDRSAEVMV  
SILGVMKAGAAFLPIDPDTPEERIRYSLSDSGAKFAVVNERNMTAIGQYEGIIVSLDDGKWRNESKERPSSISGSRNLAYVIYTS GT  
TGKPKGVQIEHRNL TNYSWFSE EAGLTENDKT VLLSSYAFDLGYTSMFPVLLGGGELHIVQKETYTAPDEIAHYIKEHGITYIKLT  
PSLFHTIVNTASFAKDANFESLRLIVLGGEKIIPTDVI AFRKMYGHTEFINHYGPT EATIGAIAGRVLDYEPDAFAKRPTIGRPIAN  
AGALVLNEALKLVPPGASGQLYITGQGLARGYLNRPQLTAERFVENPYPSPGSLMYKTGDVVRRLSDGT LAFI GRADDQVKIRGYRIE  
PKEIETVMLSLSGIQEAVVLAVSEGG LQELCAYTSDQDIEKAE LRYQLSLTLPSHMI PAFFVQVDAIPLTANGKTD RNALPKPNAA  
QSGKALAAPETALEESLCRIWQKTLGIEAIGIDDNFFDLGGHSLKGMMLIANIQAELEKSVPLKALFEQP TVRQLAAYMEASAGSR  
SHHHHHH

### SrfAC

MSQFSKDQVQDMYYLSPMQEGMLFHAILNPGQS FYLEQITMKVKGSLNIKCLEESMNVIMDRYDVFR TVFIHEKVKRPVQVVLKKRQ  
FHIEEIDLTHLTGSEQTAKINEYKEQDKIRGFDLTRDIPMRAAIFKKAEESEFWVWSYHHIILDGWCFCGIVVQDLFKVYNALREQKP  
YSLPPVKPYKDYIKWLEKQDKQASLRYWREYLEGFEGQTTFAEQKKQKDGYEPKELLFSLSEAETKAFTELAKSQHTTLSTALQAV  
WSVLISRYQQSGDLAFGT VVSGRPAEIKGVEHMGVLFINNVPRRVKLSEGITFNGLLKRLQEQLQSEPHQYVPLYDIQS QADQPKL  
IDHII VFENYPLQDAKNEESSENGFDMVDVHVFEKS NYDLNL MASPGDEMLIKLAYNENVFDEAFILRLKSQLLTAIQQLIQNPDQP  
VSTINLVDDREREFLLTGLNPPAQAHETKPLTYWFKEAVNANPDAPALTYSGQTL SYRELDEEANRIARRLQKHGAGKGSVVALYTK  
RSLELVIGILGV LKAGAA YLPVDPKLPEDRISYMLADSAACLLTHQEMKEQAAELPYTGTTLFID DQTRFEEQASDPATAIDPNDP  
AYIMYTS GTTGKPKGNITTHANIQGLVKHVDYMAFSDDQDTFLSVSNYAFDAFTDFYASMLNAARLI IADEHTLLDTERLTDLILQE  
NVNVMFATTALFNLLTDAGEDWMKGLRCILFGGERASVPHVRKALRIMGPGKLINCYGPTEGTVFATAHVVDLPDSISSLPIGKPI  
SNASVYILNEQSQLQPF GAVGELCISGMGVSKGYVNRADLTKEKFIENPFKPGETLYRTGDLARWLPDGTIEYAGRIDDQVKIRGHR  
IELEEIEKQLQEYPGVKDAVVVADRHESGDASINAYLVNRTQLSAEDVKAHLKKQLPAYMVPQTF TFLDELPLTTNGKVNKRLLPKP  
DQDQLAE EWIGPRNEMEETIAQIWSEVLGRKQIGIHDDFFALGGHSLKAMTAASRIKKELGIDL PVKLLFEAPTITAGISAYLKNNGS  
DGLQDVTIMNQDQE QIIFAFPVVLGYGLMYQNLSSRLPSYKLCADFIEEDRDLRYADLIQKLQPEGPLTLFGYSAGCSLAF EAAK

KLEEQGRIVQRIIMVDSYKKQGVSDLDGRTVESDVEALMNVNRDNEALNSEAVKHGLKQKTHAFYSYYVNLISTGQVKADIDLTTSG  
ADFDMPPEWLASWEEATTGVYRVKRGFGTHAEMLQGETLDRNAEILLEFLNTQTVTVSGSRSHHHHHH

### JesA1

MLNASETAQLQAWNAEPQHFAEDRTIHQQFEARAAERPEAVALVYQGESLSYGELNARANQVAHRLALGVRPDDRVAICVERGPAM  
IIGLLGILKSGAGYVPLDPAYPRERLAYTLGDSAPVALLSQHSVQEALPAVKVPVINLDDADLRDESVRNPQVAVSATHLAYVIYTS  
GSTGVPKGMVMEHCNVARLFSATDAWFGFNEKDVWALFHSFAFDVSVWEIWGALLHGGRLILVQVLVSRSPEDCYELLCSAGVTVLN  
QTPSAFRQLIAAQGESGQPHSLRQVIFGGEALDTAMLKWPYARDLNAATQLVNMYGITETTTHVHTYYPQLQAEDAQRVGVSPIGRGIP  
DLRLYLDDGYGQPLPPGVVGGELYVGGAGVARGYLNREELNASRFLDDPFVSTPGARMYRSGDLGRWLADGSLEYLGRNDEQVKIRGF  
RIELGEIEAQLAACEGVRDAVVLVREDEPGDKRLVAYVIGKAGVELDAAQLRDLRLALAEYMLPSAFVSLSEFPLTANGKLDKAL  
PVPADAYARREYEAEPEGPAETTLAAGLWAEELGVEQVGRHDQFFELGGHSL LAVKLIERMQRQVGLSADVRVLFQOPTLAALAAASGK  
GGEIGSRSHHHHHH

### GrsB1

MSTFKKEHVQDMYRLSPMQEGMLFHALLDKDKNAHLVQMSIAIEGIVDVELLSESNILIDRYDVFRTTFLHEKIKQPLQVVLKERP  
VQLQFKDISSLDEEKREQAIEQYKQDGETVFDLTRDPLMRVAIFQTGKVNQMIWSFHIIIMDGWCFNIIIFNDLFNIYLSLKEKKP  
LQLEAVQPYKQFIKWLEKQDKQEALRYWKEHLMNYDQSVTLPKKKAANNNTTYEPAQFRFAFDKVLTTQQLLRANQSQVTLNIVFQT  
IWGIVLQKYNSTNDVVYGSVSGRPSEISGIEKMVGLFINTLPLRIQTQKDQSFIELVKTQVHQNVLFSQQHEYFPLYEIQNHTELKQ  
NLIDHIMVIENYPLVEELQKNSIMQKVGFTVRDVKMFEPTNYDMTMVVLPRDEISVRLDYNAAYDIDFIKKIEGHMKEVALCVANN  
PHVLVQDVPLLTQKEKQHLLEVLDHDSITEYDPKTIHQLFTEQVEKTPEHVAVVFEDEKVITYRELHERSNQLARFLREKGVKKESIIG  
IMMERSVEMIVGILGILKAGGAFVPIDPEYPKERIGYMLDSVRLVLTQRHLKDKFAFTKETIVIEDPSISHELTEEIDYINESEDLF  
YIIYTSGTTGPKGVMLEHKNIVNLLHFTFEKTNINFSDKVLQYTTCSFDVCYQEIFSTLLSGGQLYLIRKETQRDVEQLFDLVKRE  
NIEVLSFPVAFLLKFIENEFINRFPCTCVKHIIITAGEQLVNNNEFKRYLHEHNVHLHNHYGPSETHVVTYITINPEAEIPELPPIGK  
PISNTWIYILDQEQQLOPQGIYGELYISGANVGRGYLNNQELTAEKFFADPFRPNERNMYRTGDLARWLPDGNIEFLGRADHQVKIRG  
HRIELGEIEAQLLNCKGVKEAVVIDKADDKGGKYLCAYYVMEVEVNDSELREYLGKALPDYMPISFFVPLDQLPLTPNGKIDRKSLP  
NLEGIVNTNAKYVVPNTNELEEKAKIWEVVLGISQIGIQDNFFSLGGHSLKAITLISRMNKECNVDIPLRLLEAFTIQEISNYING  
GSRSHHHHHH

### GrsB2

MIQPVPEQEYYPVSSVQKRMFILNEFDRSGTAYNLPGMVFLDGKLNRYQLEAAVKKLVERHEALRTSFHSINGEPVQRVHQNVELQI  
AYSESTEDQVERIAAEFMQPFALVAPLLRVGLVKLEAERHLFIMDMHHIISDGVSMQIMIQEIADLYKEKELEPTLGIQYKDFTVWH  
NRLQLQSDVIEKQEAYWLVNFAEEIPVLNLPDTPRPTIQSFDGKRFTFSTGKQLMDDLYKVATETGTTLYMVLLAAYNVFLSKYSQ  
DDIVVGTPIAGRSHADVENMLGMFVNTLAIRSRLNNEFTFKDLANVKQALHAYENPDYFPDVLVEKLGIRDLNRNPLFDTMFVL  
QNTDRKSFEVEQITITIPYVPSNRHSKFDLTLEVSEEQNEILLCLEYCTKLTFTDKTVERMAGHFLQILHAIVGNPTIIISEIETLSEE  
EKQHILFEFNDTKTTYPHMQTIQGLFEEQVEKTPDHVAVGWKDQTLTYRELNERANQVARVLRQKGVQPDNIVGLLVERSPPEMLVGI  
MGILKAGGAYLPLDPEYPADRI SYMIQDCGVRIMLTQQHLLSLVHDEFDCVILDEDSLYKGDSSNLAPVNQAGDLAYIMYTSGSTGK  
PKGVMVEHRNVIRLVKNTNYVQVREDDRIIQTGAI GFDA LTFE VFGSLLHGAE LYPVTKDVL L DAEK LHKFLQANQITIMWLTSPLF  
NQLSQGTEEMFAGLRSLIVGGDALSPKHINNVRKRCPNLTMWNGYGPTENTTFSTCFLIDKEYDDNIPIGKAISNSTVYIMDRYGQL  
QPVGVPGELCVGGDGVARGYMNQPALTEEFVFPNPFAPGERMYRTGDLARWLPDGTIEYLGRI DQQVKIRGYRIEPGEIETLLVKHK  
VKVESVIMVVEDNNGQKALCAYYVPEEEVTVSELREYIAKELPVYMPAYFVQIEQMPLTQNGKVNRSALPKPDGEFGTATEYVAPS  
SDIEMKLAEIWHNVLVGNKIGVLDNFFELGGHSLRAMTMISQVHKEFDVELPLKVLFFETPTISALAQYIADGSRSHHHHHH

### GrsB3

MIQPVTPQDYYPVSSAQKRMYYLYEFEGAGITYNVPNVMFIEGKLDYQRFEYAIKSLVNRHEALRTSFYSLNGEPVQRVHQNVELQI  
AYSEAKEDEIEQIVESFVQPFDFLEIAPLLRVGLVKLASDRYLFIMDMHHIISDGVSMQIITKEIADLYKGKELAEHLHIQYKDFAVWQ  
NEWFQSDALEKQKTYWLNFTFAEDIPVLNLPDTPRPTIQSFEQDVTFSAGKQLAEELKRLAAETGTTLYMLLAAYNVLLHKYSQ  
EEIVVGTPIAGRSHADVENIVGMFVNTLALKNTPIAVRTFHEFLLEVQNALAEAFENQDYPFENLIEKLQVRRDLNRNPLFDTMFSL  
SNIDEQVEIGIEGLNFSPYEMQYWIAKFDISFDILEKQDDIQFYFNYCTNLFKKETIERLATHFMHILQEI VINPEIKLCEINMLSE  
EEQQRVLYDFNGTDATYATNKIFHELFEQVEKTPDHIAVIDEREKLSYQELNAKANQLARVLRQKGVQPNMVMGIMVDRSLDMIVG  
MLGVLKAGGAYVPIDIDYPQERISYMMEDSGAALLLTQQKLTQQIAFSGDILYLDQEEWLHEEASNLEPIARPQDIAYIIYTSGTTG  
KPKGVMIEHQSYVNVAMAWKDAYRLDTFPVRLQMASFAFDVSAGDFARALLTGQQLIVCPNEVKMDPASLYAIKKYDITIFEATP  
ALVIPLMEYIIEQKLDISQLQILIVGSDSCSMEDFKTLVSRFGSTIRIVNSYGVTEACIDSSYYEQPLSSLHVTGTVPPIGKPYANMK  
MYIMNQYLQIQPVGIVGELCIGGAGVARGYLNRPDLTAEKFPNPFVPGKLYRTGDLARWMPDGNVEFLGRNDHQVKIRGIRIELG  
EIEAQLRKHDSIKEATVIAREDHMKEKYLCAYMVTEGEVNVAE LRAYLANDLPAAMIPSYFVSLEAMPLTANGKIDKRSLPEPDGSI  
SIGTEYVAPRTMLEGKLEEIWKDVLGLQRVGIHDDFFTIGGHS LKAMAVISQVHKECQTEVPLRVLFETPTIQGLAKYIEEGSRSHH  
HHHH

### GrsB4

MAIQPVSGQDYYPVSSAQKRMFIVNQFDGVGISYNMPSIMLIEGKLERTRLSAFKRLIERHESLRTSFEIINGKPVQKIHEEVDFN  
MSYQVASNEQVEKMIDEFIQPFDLVAPLLRVELLKLEEDRHVLIFDMHHIISDGISSNIMKELGELYQGNALPELRIQYKDFAVW  
QNEWFQSEAFKKQEYVWNVFADERPILDIPTDYPRMQQSFDGAQLTFGTGKQLMDGLYRVATETGTTLYMVLLAAYNVLLSKYSQ

QEDIIVGTPIVGRSHTDLENIVGMFVNTLAMRNKPEGEKTFKAFVSEIKQNALAAAFENQDYPFEELIEKLEIQRDLSRNPLFDTLFS  
LQNI GEESFELAE LTKPFDLVSKLEHAKFDLSLVAVEKEEEEIAFGLQYCTKLYKEKTVEQLAQHFIIQIVKAIVENPDVKLS DIDML  
SEEEKQIL LEFN DTKIQYPQNQTIQELFEEQVKKTPEDIAI VWEQGALTYHELN I KANQLARVLREKGVTPNHPVAIMTERSLEMI  
VGIF SILKAGGAYVPIDPAYPQERIQYLLED SGATLLLTQSHVLNKL PVDIEWLDLTDEQNYVEDGTNL PFMNQSTDLAYIIYTSGT  
TGKPKGVMIEHQSIINCLQWRKEEYEF GPGDTALQVFSFAFDGFVASFAPILAGATS VLPKEEEEAKDPVALKKLIASEEITHYGYV  
PSLFSAILDVSSSKDLQNLRCVTLGGEKLP AQIVKKIKEKNKEIEVNNEYGPTENS VVTTIMRDIQVEQEITIGRPLSNVDVYIVNC  
NHQLQPVGVV GELCIGGQGLARGYLNKPELTADKFVVNPFVPGERMYKTGD LAKWRS DGMIEYVGRVDEQVKVRGYRIELGEIESAI  
LEYEKIKEAVVMVSEHTASEQMLCAYIVGEEDVLTLDLRSYLAKLLPSYMI PNYFIQLDSIPLTPNGKVDRKALPEPQTIGLMAREY  
VAPRNEIEAQLVLIWQEV LGIELIGITDNFFELGGHSLKATLLVAKIYEYMQIEMPLNVVFKHSTIMKIAEYITHQESENN VHQPI L  
VNVEADREALSNGEKQRKNIELPILLNEETDRNVFCFAPIGA QGVFYK KLAEQIPTASLYGDFDIEDDDR IQQYIESMIQTQSDGQ  
YVLI GYSSGGNLA FEVAKEMERQGYSVSDLVLF DVYWKGVFEQTKEEEEEENIKIIMEELRENPGFMNMTREDFELYFANEFVKQSF  
TRKMRKYMSFYTQLVNYGEVEATIH LIQAEFEEEKIDENEKADEEEKTYLEEKWNEKAWNKA AKRFVKYNGYGAHSNMLGGDGLERN  
SSILKQILQGT FVVKGSRSHHHHHH

## GrsB

MSTFKKEHVQD MYRLSPMQEGMLFHALLDKDKNAHLVQMSIAIEGIVDV ELLSES LNILIDRYDVFR TTFLEHEKIKQPLQVVLKERP  
VQLQFKDISSLDEEKREQAIEQYKYQDGETVFDLTRDPLMRVAIFQTGKVNYQMIWSFH HILMDGWCFNII FNDLFNIYLSLKEKKP  
LQLEAVQPYKQF KWLKQDKQKQALRYWKEHLMNYDQSVTL PPKKAAINNTT YEPAQFRFAFDKVLTQQLLRANQSQVTLNIVFQT  
IWGIVLQKYNSTNDV VYGSVVSGRPSEISGIEKMVGLFINTLPLRIQTQKDQSFIELVKT VHQNVLFSQQHEYFPLYEIQNHTELKQ  
NLIDHIMVIENYPLVEELQKNSIMQKVGFTVRDV KMFPTNYDMTVMVLPRDEISVRLDYNAAVYDIDFIKKIEGHMKEVALCVANN  
PHVLVQDVPLLTQKEKQHLLELHDSITEY PDKTILHQLFTEQVEKTP EHVAVVFEDEKVTYRELHERSNQLARFLREKGVKKE S IIG  
IMMERSVEMIVGILGILKAGGAFVPIDPEY PKERIGYMLDSVRLVLTQRHLKDKFAFTKETIVIEDPSISHELTEEIDYINESEDLF  
YIIYTS GTTGKPKGVMLEHKNIVNLLHFTFEKTNINFS DKVLQYTTCSFDVCYQE I FSTLLSGGQLYLIRKETQRDVEQLFDLVKRE  
NIEVLSFPVAF LKFI FNEREFINRFP TCVKHII TAGEQLVNVNEFKRYLHEHNVHLHNHYGPSETHVVTY TINPEAEIPELPPIGK  
PISNTWIIYILDQEQQLQPPGIVGELYISGANVGRGYLNNQELTAEKFFADPFRPNERNMYRTGDLARWL PDGNI EFLGRADHQVKIRG  
HRIELGEIEAQLLNCKGVKEAVVIDKADDKGGKYLCA YVVMVEVNDSELREYL GKALPDY MIPSF FVPLDQLPLTPNGKIDRKSLP  
NLEGIVNTNAKYV VPTNELEEKLAKIWE EVLGISQIGIQDNFFSLGGHSLKAITLISRMNKECNVDIPLRLFEAPT IQEISNYING  
AKKESYVAIQPVPEQ EYYPVSSVQKRMFILNEFDRSGTAYNLPGVMFLDGKLN YRQLEAAVKKLVERHEALRTSFHS INGE PVQRVH  
QNVELQIAYSESTEDQVERIIAEFMQPFAL E VAPLLRVGLVKLEAERHLFIMDMHIIISDGVSMQIMIQE IADLYKEKELPTLGIQY  
KDFTVWHNRLLQSDVIEKQEAYWLVNFAEEI PVLNLPTDYPRTIQSFDGKRFTFSTGKQLMDDLYKVATETGTTLYMVLLAAYNVF  
LSKYSQDDIIVGTPIAGRSHADVENMLGMFVNTLAIRSRLNNE DTFKDFLANVKQTALHAYENPDY PFDTLVEKLG IQRDLSRNPL  
FDTMFVLQNTDRKSFEVEQITITPYVPNSRH SKFDLTLEVSEEQNEILLCLEYCTKLF TDKTVERMAGHFLQILHAI VGNPTIIISE  
IEILSEEKQHILFEFN DTKTTPYPMQTIQGLFEEQVEKTPDHVAVGWKDQTLTYRELNERANQVARVLRQKGVQPDNIVGLLVERS  
PEMLVGIMGILKAGGAYLPDPEYPADRISYMIQDCGVRI MLTQQHLLSLVHDEFDCVILDEDSLYKGDSSNLAPV NQAGDLAYIMY  
TSGSTGKPKGVMVEHRNVIRLVKNTNYVQVREDDRI IQTGAIGFDALTFEVFGSLLHGAELYPVTKDVLDDAEK LKHLQANQITIM  
WLTSP LFNQLSQGTEEMFAGLRSLIVGGDALSPKHINNVRKCPNLTMWNGYGP TENTTFSTCFIDKEYDDNIPIGKAISNSTVYI  
MDRYGQLQPVGPV GELCVGGDVARGYMNQPALTEEFV PNPFPAPGERMYRTGDLARWL PDGTIEYLGRIDQQVKIRGYRIEPEGEIE  
TLLVKHKKVKESVIMVVEDNNGQKALCAYVPEEEVTVSELREYIAKELPVYMPAYFVQIEQMP L TQNGKVNRSALPKPDGEFGTA  
TEYVAPSSDIEMKLA EIWHNVLG VNKIGVLDNFFELGGHSLRAMTMSQVHKEFDVELPLKVL FETPTISALAQYIADGEKGMYLAI  
QPVT PQDYYPVSSAQKRMYYLIEFEGAGITYNVPNVMFIEGKLDYQRFEYAIKSLVNRHEALRTSFYSLNGEPVQRVHQNVELQIAY  
SEAKDEIEQIVESFVQPF DLEIAPLLRVGLVKLASDRYLF LMDMHIIISDGVSMQIITKEIADLYKGKELAE LHIQYKDFAVWQNE  
WFQSDALEKQKTYWLN TFAEDIPVLNLSTDYPRPTIQSFE GDI VTF SAGKQLAEELKRLAAETGTTLYM LLLAAYNVLLHKYSGQEE  
IVVGTPIAGRSHADVENIVGMFVNTLALKNTPIAVRTFHEF LLEVQKNALEAFENQDYPFENLIEKLQVRDRDLSRNPLFDTMFSLSN  
IDEQVEIGIEGLNFS PYEMQYWI AKFDISFDILEKQDDIQFYFNYCTNLFKKETIERLATHFMHILQEIVINPEIKLCEINMLSEEE  
QQRVLYDFNGT DATYATNKIFHELFE EQVEKTPDHIAVIDEREKLSYQELNAKANQLARVL RQKGVQPN SMVGIMVDRSLDMIVGML  
GVLKAGGAYVPIDIDYPQERISYMMEDSGAALLLTQQKLTQQIAFSGDILYLDQEEWLHEEASNLEPIARPQDIAYIIYTS GTTGK  
KGMVIEHQSYVNVAMAWKDAYRLDTFPVRL LQMASFAFDVSAGDFARALLTGGLIVCPNEVKMDPASLYAI IKKYDITIFEATPAL  
VIPLM EYIIEQKLDISQLQILIVGSDSCMEDFKTLVSRFGSTIRIVNSYGVTEACIDSSYEQPLSSLHVTGTVP I GKPYANMKMY  
IMNQYLQIQPVGVIGELCIGGAGVARGYLNRPDLTAEKFVPNPFPVGEKLYRTGDLARWMPDGNVEFLGRNDHQVKIRGIRIELGEI  
EAQLRKHDSIKEATVIAREDHMKEKYLCA YMVTEGEVNV AELRAYLANDLPAA MIPSYFVSLEAMPLTANGKIDKRS LPEPDGSISI  
GTEYVAPRTMLEGLLEEIWKDV LGLQRVGIHDDFFTIGGHSLKAMAVISQVHKECQTEVPLRVLFETPTIQGLAKYIEETDTEQYMA  
IQPVSGQDYYPVSSAQKRMFIVNQFDGVGISYNMPSIMLIEGKLERTRL ESAFKRLIERHESLRTSFEIINGKPVQKIHEEVDNMS  
YQVASNEQVEKMIDEFIQPF DLSVAPLLRVELLKL EEDRHVLI FDMHIIISDGISSNIMKELGELYQGNALPELRIQYKDFAVWQN  
EWFQSEAFKKQEY YWNVFADERPILDIPTDYPRMPQQSFDGAQLTFGTGKQLMDGLYRVATETGTTLYMVLLAAYNVLLSKYSGQE  
DIIVGTPIVGRSHTDLENIVGMFVNTLAMRNKPEGEKTFKAFVSEIKQNALAAAFENQDYPFEELIEKLEIQRDLSRNPLFDTLSLQ  
NIGEE SFELAE LTKPFDLVSKLEHAKFDLSLVAVEKEEEEIAFGLQYCTKLYKEKTVEQLAQHFIIQIVKAIVENPDVKLS DIDMLSE  
EEKKQIL LEFN DTKIQYPQNQTIQELFEEQVKKTPEDIAI VWEQGALTYHELN I KANQLARVLREKGVTPNHPVAIMTERSLEMI V  
IFSILKAGGAYVPIDPAYPQERIQYLLED SGATLLLTQSHVLNKL PVDIEWLDLTDEQNYVEDGTNL PFMNQSTDLAYIIYTSGTG  
KPKGVMIEHQSIINCLQWRKEEYEF GPGDTALQVFSFAFDGFVASFAPILAGATS VLPKEEEEAKDPVALKKLIASEEITHYGYVPS  
LFSAILDVSSSKDLQNLRCVTLGGEKLP AQIVKKIKEKNKEIEVNNEYGPTENS VVTTIMRDIQVEQEITIGRPLSNVDVYIVNCNH  
QLQPVGVV GELCIGGQGLARGYLNKPELTADKFVVNPFVPGERMYKTGD LAKWRS DGMIEYVGRVDEQVKVRGYRIELGEIESAILE  
YEKIKEAVVMVSEHTASEQMLCAYIVGEEDVLTLDLRSYLAKLLPSYMI PNYFIQLDSIPLTPNGKVDRKALPEPQTIGLMAREYVA  
PRNEIEAQLVLIWQEV LGIELIGITDNFFELGGHSLKATLLVAKIYEYMQIEMPLNVVFKHSTIMKIAEYITHQESENN VHQPI LVN



VEADREALSLNGEKQRKNIELPILLNEETDRNVFCFAPIGAQQGVFYKKLAEQIPTASLYGFDFIEDDDRIQQYIESMIQTQSDGQYV  
LIGYSSGGNLAFEVAKEMERQGYSVSDLVLFVDVYWKGVFEQTKEEEEENIKIIMEELRENPGMFNMTREDFELYFANEVFKQSFT  
KMRKYMSFYTQLVNYGEVEATIHLIQAEFEEKIDENEKADEEEKTYLEEKWNEKAWNKAARFVKYNGYGAHSNMLGGDGLERNSS  
ILKQILQGTFFVVKGSRSRSHHHHHH

## MetRS

MTQVAKKILVTCALPYANGSIHLGHMLEHIQADVWVRYQMRGHEVNFICADDAHGTPIMLKAQQLGITPEQMIGEMSQEHQTDFAG  
FNI SYDNYHSTHSEENRQLSELIYSRLKENGFIKNRTISQLYDPEKGMFLPDRFVKGTCPKCKSPDQYGDNCEVCGATYSPTELIEP  
KSVVSGATPVMRDSEHFFFDLPSFSEMLQAWTRSGALQEQVANKMQEWFESGLQQWDISRDAFYGFGEIPNAPGKYFYVWLDAPIGY  
MGSFKNLCKRGDSVSFDEYWKKDSTAELYHFIGKDIVYFHSFWPAMLEGSNFRKPSNLFVHGYYTVNGAKMSKSRGTFIKASTWL  
NHFDADSLRYYYTAKLSSRIDDI DLNLEDFVQVRNADIVNKVNLASRNAGFINKRFDGVLASELADPQLYKTFDTAAEVIIGEAWES  
REFGKAVREIMALADLANRYVDEQAPWVVAQEQGRDADLQAICSMGINLFRVLMTYLKPVLPKLTERAEAFNLTELTWDGIQQPPLG  
HKVNPFKALYNRIDMRQVEALVEASKEEVKAAAPVTGPLADDP IQETITFDDFAKVDLRVALIENAEFVEGSDKLLRLTLDLGGEK  
RNVFSGIRSAYPDPQALIGRHTIMVANLAPRKMRFGISEGMVMAAGPGGKDIFLLSPDAGAKPGHQVKKHHHHHH

## LeuRS

MQEQYRPEEIESKVQLHWDEKRTFEVTEDESKEKYYCLSMPLPYPSGRRLHMGHVRNYTIGDVIARYQRMGLKGNVLQPIGWDAFGLPAE  
GAAVKNNNTAPAPWYTDNIA YMKNQLKMLGFGYDWSRELATCTPEYYRWEQKFFTELYKKGLVYKKTSAVNWCNDQTVLANEQVIDG  
CCWRCDTKVERKEIPQWFIKITAYADELLNDLKDLDHWPDTVKTMQRNWIGRSEGEITFNVNDYDNTLT VYTRPDTFMGCTYLAV  
AAGHPLAQKAAENNP ELAAFIDECRNTKVAEAE MATMEKKGVDTGFKAVHPLTGEEIPVWAANFVLMEYGTGAVMAVPGHDQRDYE  
ASKYGLNIKPVILAADGSEPDLSQQALTEKGVLFNSGFEFNGLDHEAAFNAIADKLTAMGVGERKVNRYRLRDWGVSRQRYWGAPIPMV  
TLEDGTVMPTPDDQLPVLPEDEVMDGITSPIKADPEWAKTTVNGMPALRETDTFDTFMESSWYYARYTC PQYKEGMLDSEAAANYWL  
PVDIYIGGIEHAIMHLLYFRFFHKLMRDAGMVNSDEPAKQLLCQGMVLADAFYVVGENGERNWVSPVDAIVERDEKGRIVKAKDAAG  
HEL VYTGM SKMSKSKNNGIDPQVMVERYGADTVRLFMMFASPADMTLEWQESGVEGANRFLKRVWKLVEYHTAKGDVAALNVDALTE  
NQKALRRDVHKTIAKVTD DIGRRQTFNTAIAAIME LMNKLAKAPT DGEQDRALMQEALLAVVRMLNPFTPHICFTLWQELKGEGDID  
NAPWPVADEKAMVEDSTLVVVQVNGKVRAKITVPVDATEEQVRERAGQEHLVAKYLDGVTVRKVIYVPGKLLNLVVGKHHHHHH

## HisRS

MAKNIQAIRGMNDYLPGETAIWQRIEGLTKNVLGSYGYSEIRLPIVEQTPLFKRAIGEVTDVVEKEMYTFEDRNGDSLTLRPEGTAG  
CVRAGIEHGLLYNQEQRLWYIGPMFRHERPQKG RYRQFHQLGCEVFG LQGPDIDAELIMLTARWWRALGISEHVTLELNSIGSLEAR  
ANYRDALVAFLEQHKEKLDEDCRMRMYTNPLRVLDSKNPEVQALLNDAPALGDYLD EESREHFAGLCKLLESAGIAYTVNQRLVRGL  
DYNRNRTVFEWVTNSLGSQGTVCAGGRYDGLVEQLGGRATPAVG FAMGLERLVLLVQAVNPEFKADPVVDIYLVASGADTQSAAMALA  
ERLRDELPGVKLMTNHGGGNFKKQFARADKWGARVAVVLGESEVANGTAVVKDLRSGEQTAVAQDSVA AHLRTL LGKHHHHHH

## sdV-GrsA

MLNSSKSILIH AQNKNGTHEEEQYLF AVNNTKAEYPRDKTIHQLFEEQVSKRPNNVAIVCENEQLTYHELVKANQLARIFIEKGIG  
KDTLVGIMMEKSIDLFIGILAVLKAGGAYVPIDIEYPKERIQYILDDSQARMLLTQKHLVHLIHN IQFNGQVEIF EEDTIKIREGTN  
LHVPSKSTD LAYVIYTS GTTGNPKGTMLEHKGISNLKVFFENSLNVREDDRIQTGAIGFDALTFEVFGSLLHGAELYPVTKDVLDD  
AEKLHKFLQANQITIMWLTSP LFNQLSQGTEEMFAGLRSLIVGGDALSPKHINNVRKCPNLTMWNGYGPTENTTFSTCFLIDKEYD  
DNIPIGKAIQNTQIYIVDENLQLKSVGEAGELCIGGEG LARGYWKRPELTSQKFVDNPFVPGEKLYKTGDQARWLS DGNIEYLGRID  
NQVKIRGHRVELEEVE SILLKHYISETAVSVHKDHQEQPYLCAYFVSEKHIPLEQLRQFSSEELPTYMIPSYFIQLDKMPLTSNGK  
IDRKQLPEPDLTFGMRVDYEA PRNEIEETLVTIWQDVLGIEKIGIKDNFYALGGDSIKAIQVAARLHSYQLKLET KDLLKYPTIDQL  
VHYIKDSKRSEQGIVEGEIGLTPIQHWFFEQQFTNMHWNQSYM LYPNGFDKEILLRVFNKIVEHHDALRMIYKHHNGKIVQINR  
GLEGLTFDFYTFDLTANDNEQQV ICEESARLQNSINLEVGPLVKIALFHTQNGDHLFMAIHHLVVDGISWRILFEDLATAYEQAMHQ  
QTIALPEKTDSFKDWSIELEKYANSELFLEEAEYWHHLNYYTENVQIKKDYVTMNNKQKNIRYVGMELTIEETEKLLKNVNKAYRTE  
INDILLTALGFALKEWADIDKIVINLEGHGREEILEQMNIARTVGWFTSQYPVVLDMQKSD DLSYQIKLMKENLRRIPNKGIGYEIF  
KYLTTEYLRPVL PFTLKPEINFNYLGQFDTDVKTELFTRSPYSMGNSLGPDGKNNLSPEGESYFVLNINGFIEEGKLHITFSYNEQQ  
YKEDTIQQLSRSYKQHLLAIEHC VQKEDTELTPSDFS FKELELEEMDDIFDLLADSLTGSRSHHHHHH

## 11 NMR analysis and spectra

NMR measurements were performed on a Bruker AVANCE II 300 MHz, Bruker AVANCE II 500 MHz and a Bruker AVANCE II 600 MHz spectrometer, equipped with a Bruker Cryoplatfrom. The chemical shifts are reported in parts per million (ppm) relative to the solvent residual peak of D<sub>2</sub>O (<sup>1</sup>H: 4.79 ppm, singlet) for <sup>1</sup>H and trifluoroacetic acid (<sup>13</sup>C: 164.2 ppm, quartet) for <sup>13</sup>C spectra. For NMR analysis, hydroxamates and corresponding amino acids were dissolved in 1.8% trifluoroacetic acid (TFA) in D<sub>2</sub>O and recorded NMR spectra were compared. The conversion to hydroxamic acid is determined by ~0.2 ppm shift of Cα <sup>1</sup>H and ~5 ppm shift of <sup>13</sup>Cα with respect to the corresponding proton and carbon shifts of free amino acid. The purity of hydroxamates was determined by comparing integral of Cα <sup>1</sup>H of the hydroxamate to the <sup>13</sup>Cα proton of corresponding free amino acid, which was a major impurity. Atoms are labeled according to the atom names, remoteness codes and order indicators for amino acid residues of Protein Data Bank (PDB) nomenclature.

**SI Table 4.** NMR data.

| Compound  | Position     | $\delta_H$ , mult. ( <i>J</i> in Hz)/nH            | $\delta_C$ |
|-----------|--------------|----------------------------------------------------|------------|
| GlyHA     | C            |                                                    | 165.7      |
|           | C $\alpha$   | 3.70, s/1H                                         | 39.7       |
| AlaHA     | C            |                                                    | 169.1      |
|           | C $\alpha$   | 3.94, q (7.1)/1H                                   | 48.5       |
|           | C $\beta$    | 1.46, d (7.1)/3H                                   | 17.7       |
| SerHA     | C            |                                                    | 166.3      |
|           | C $\alpha$   | 4.05, dd (5.9, 4.7)/1H                             | 54.0       |
|           | C $\beta$    | 3.96, dd (12.3, 4.7)/1H<br>3.90, dd (12.3, 5.9)/1H | 61.4       |
| ThrHA     | C            |                                                    | 166.2      |
|           | C $\alpha$   | 3.68, d (7.2)/1H                                   | 58.5       |
|           | C $\beta$    | 4.12 – 4.05, m/1H                                  | 67.6       |
|           | C $\gamma$   | 1.26, d (6.4)/3H                                   | 20.2       |
| CystineHA | C            |                                                    | 166.1      |
|           | C $\alpha$   | 4.23, dd (6.8)/1H                                  | 51.4       |
|           | C $\beta$    | 3.31, dd (14.8, 6.5)/1H<br>3.23, dd (14.8, 7.2)/1H | 38.5       |
| ValHA     | C            |                                                    | 167.4      |
|           | C $\alpha$   | 3.53, d (7.1)/1H                                   | 58.1       |
|           | C $\beta$    | 2.16 – 2.02, m/1H                                  | 31.2       |
|           | C $\gamma$ 1 | 0.98, d (6.8)/3H                                   | 18.8       |
|           | C $\gamma$ 2 | 0.93, d (6.8)/3H                                   | 18.8       |
| LeuHA     | C            |                                                    | 168.4      |
|           | C $\alpha$   | 3.80, dd (7.4)/1H                                  | 51.2       |
|           | C $\beta$    |                                                    | 40.9       |
|           | C $\gamma$   | 1.75 – 1.50, m/3H                                  | 25.3       |
|           | C $\delta$ 1 | 0.88, d (2.7)/3H                                   | 22.7       |
|           | C $\delta$ 2 | 0.86, d (2.6)/3H                                   | 22.6       |
| IleHA     | C            |                                                    | 167.5      |
|           | C $\alpha$   | 3.61, d (6.8)/1H                                   | 57.0       |
|           | C $\beta$    | 1.93 – 1.80, m/1H                                  | 37.5       |
|           | C $\gamma$ 1 | 1.52 – 1.39, m/1H<br>1.26 – 1.09, m/1H             | 25.9       |
|           | C $\gamma$ 2 |                                                    | 15.2       |
|           | C $\delta$   | 0.96 – 0.81, m/6H                                  | 11.6       |
| MetHA     | C            |                                                    | 167.5      |
|           | C $\alpha$   | 3.97, dd (7.1)/1H                                  | 51.6       |
|           | C $\beta$    | 2.63 – 2.50, m/2H                                  | 31.0       |
|           | C $\gamma$   | 2.17 – 2.10, m/2H                                  | 29.6       |
|           | C $\epsilon$ | 2.08, s/3H                                         | 15.3       |

**SI Table 4.** NMR data (continued).

| Compound                       | Position       | $\delta_H$ , mult. ( $J$ in Hz)/nH   | $\delta_C$ |
|--------------------------------|----------------|--------------------------------------|------------|
| <b>ProHA</b>                   | C              |                                      | 168.2      |
|                                | C $\alpha$     | 4.25, dd (7.6)/1H                    | 59.3       |
|                                | C $\beta$      | 2.43 – 2.34, m/1H                    | 31.0       |
|                                | C $\gamma$     | 2.10 – 2.01, m/3H                    | 25.3       |
|                                | C $\delta$     | 3.46 – 3.35, m/2H                    | 48.0       |
| <b>PheHA</b><br>(DMSO- $d_6$ ) | C              |                                      | 164.2      |
|                                | C $\alpha$     | 3.86 – 3.67, m/1H                    | 51.8       |
|                                | C $\beta$      | 3.03 – 2.96, m/2H                    | 37.1       |
|                                | C $\gamma$     |                                      | 135.0      |
|                                | C $\delta$ 1   |                                      | 128.7      |
|                                | C $\delta$ 2   |                                      |            |
|                                | C $\epsilon$ 1 | 7.39- 7.16, m/5H                     | 129.5      |
|                                | C $\epsilon$ 2 |                                      |            |
| <b>TyrHA</b>                   | C              |                                      | 167.2      |
|                                | C $\alpha$     | 3.95, dd (6.8, 8.3)/1H               | 54.1       |
|                                | C $\beta$      | 3.11 – 3.00, m/2H                    | 37.3       |
|                                | C $\gamma$     |                                      | 126.9      |
|                                | C $\delta$ 1   | 7.13 – 7.08, m/2H                    | 132.2      |
|                                | C $\delta$ 2   |                                      |            |
|                                | C $\epsilon$ 1 | 6.87 – 6.82, m/2H                    | 117.2      |
|                                | C $\epsilon$ 2 |                                      |            |
| <b>TrpHA</b>                   | C              |                                      | 167.8      |
|                                | C $\alpha$     | 4.07, dd (7.4)/1H                    | 53.2       |
|                                | C $\beta$      | 3.33, d (3.0)/1H<br>3.31, d (2.2)/1H | 28.3       |
|                                | C $\gamma$     |                                      | 107.8      |
|                                | C $\delta$ 1   | 7.26, s/1H                           | 126.8      |
|                                | C $\delta$ 2   |                                      | 127.9      |
|                                | C $\epsilon$ 2 |                                      | 137.7      |
|                                | C $\epsilon$ 3 | 7.61 – 7.57, m/1H                    | 119.6      |
|                                | C $\zeta$ 2    | 7.5 – 7.46, m/1H                     | 113.5      |
|                                | C $\zeta$ 3    | 7.24 – 7.21, m/1H                    | 121.0      |
|                                | C $\eta$ 2     | 7.17 – 7.11, m/1H                    | 123.6      |
| <b>AspHA</b>                   | C              |                                      | 166.9      |
|                                | C $\alpha$     | 4.26, dd (6.5)/1H                    | 49.0       |
|                                | C $\beta$      | 3.08 – 2.96, m/2H                    | 36.0       |
|                                | C $\gamma$     |                                      | 173.7      |
| <b>GluHA</b>                   | C              |                                      | 167.4      |
|                                | C $\alpha$     | 3.93, dd (7.0)/1H                    | 51.9       |
|                                | C $\beta$      | 2.16, m/2H                           | 27.1       |
|                                | C $\gamma$     | 2.53, dd (12.3, 7.2)/2H              | 30.4       |
|                                | C $\delta$     |                                      | 177.3      |

**SI Table 4.** NMR data (continued).

| Compound         | Position       | $\delta_{\text{H}}$ , mult. ( $J$ in Hz)/nH        | $\delta_{\text{C}}$ |
|------------------|----------------|----------------------------------------------------|---------------------|
| HisHA            | C              |                                                    | 166.1               |
|                  | C $\alpha$     | 4.15, dd (7.3)/1H                                  | 51.7                |
|                  | C $\beta$      | 3.44 – 3.35, m/2H                                  | 27.2                |
|                  | C $\gamma$     |                                                    | 127.1               |
|                  | C $\delta$ 2   | 7.44, s/1H                                         | 119.8               |
|                  | C $\epsilon$ 1 | 8.72, s/1H                                         | 135.8               |
| LysHA            | C              |                                                    | 167.8               |
|                  | C $\alpha$     | 3.79, dd (7.1)/2H                                  | 52.4                |
|                  | C $\beta$      | 1.89 – 1.79, m/2H                                  | 31.5                |
|                  | C $\gamma$     | 1.43 – 1.33, m/2H                                  | 22.7                |
|                  | C $\delta$     | 1.70 – 1.58, m/2H                                  | 27.6                |
|                  | C $\epsilon$   | 2.98 – 2.89, m/2H                                  | 40.4                |
| ArgHA            | C              |                                                    | 167.7               |
|                  | C $\alpha$     | 3.86, dd (7.0)/1H                                  | 52.4                |
|                  | C $\beta$      | 1.93 – 1.86, m/2H                                  | 29.3                |
|                  | C $\gamma$     | 1.67 – 1.58, m/2H                                  | 25.2                |
|                  | C $\delta$     | 3.24 – 3.18, m/2H                                  | 41.8                |
|                  | C $\zeta$      |                                                    | 65.8                |
| PipHA            | C              |                                                    | 168.1               |
|                  | C $\alpha$     | 3.84, dd (12.0, 3.4)/1H                            | 57.0                |
|                  | C $\beta$      |                                                    | 28.1                |
|                  | C $\gamma$     | 2.13 – 2.03, m/1H                                  | 22.3                |
|                  | C $\delta$     | 1.97 – 1.47, m/5H                                  | 22.4                |
|                  | C $\epsilon$   | 3.54 – 3.39, m/1H<br>3.12 – 2.98, m/1H             | 45.3                |
| Phenylglycine HA | C              |                                                    | 167.1               |
|                  | C $\alpha$     | 4.97, s/1H                                         | 55.8                |
|                  | C $\beta$      |                                                    | 132.8               |
|                  | C $\gamma$ 1   |                                                    | 131.7               |
|                  | C $\gamma$ 2   |                                                    |                     |
|                  | C $\delta$ 1   | 7.44 – 7.34, m/5H                                  | 130.9               |
|                  | C $\delta$ 2   |                                                    |                     |
| $\beta$ -PheHA   | C $\epsilon$   |                                                    | 129.1               |
|                  | C              |                                                    | 169.0               |
|                  | C $\alpha$     | 2.82, dd (14.9, 6.7)/1H<br>2.68, dd (14.9, 8.0)/1H | 37.8                |
|                  | C $\beta$      | 4.65 – 4.53, dd (7.3)/1H                           | 53.6                |
|                  | C $\gamma$     |                                                    | 136.0               |
|                  | C $\delta$ 1   |                                                    | 130.8               |
|                  | C $\delta$ 2   |                                                    |                     |
|                  | C $\epsilon$ 1 | 7.38 – 7.24, m/5H                                  | 131.1               |
|                  | C $\epsilon$ 2 |                                                    |                     |
|                  | C $\zeta$      |                                                    | 128.3               |

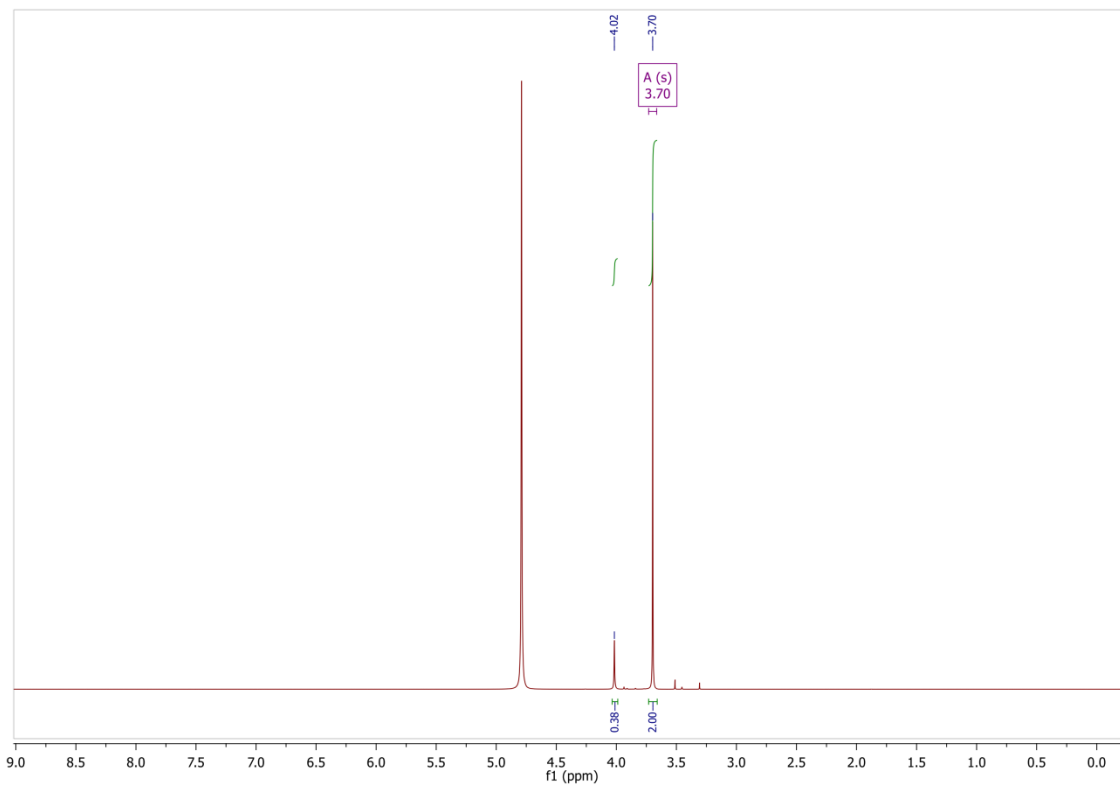

$^1\text{H}$  NMR spectrum of GlyHA ( $\text{D}_2\text{O}$  + 1.8% TFA, 300 MHz).

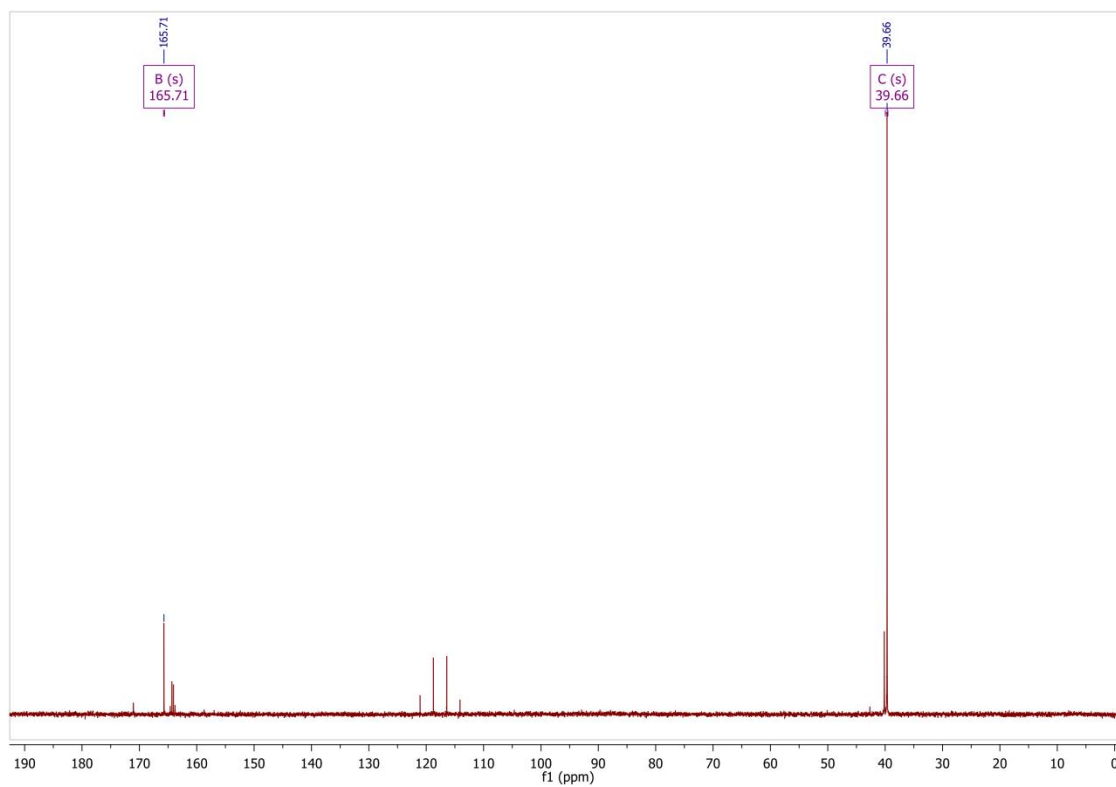

$^{13}\text{C}$  NMR spectrum of GlyHA ( $\text{D}_2\text{O}$  + 1.8% TFA, 126 MHz).

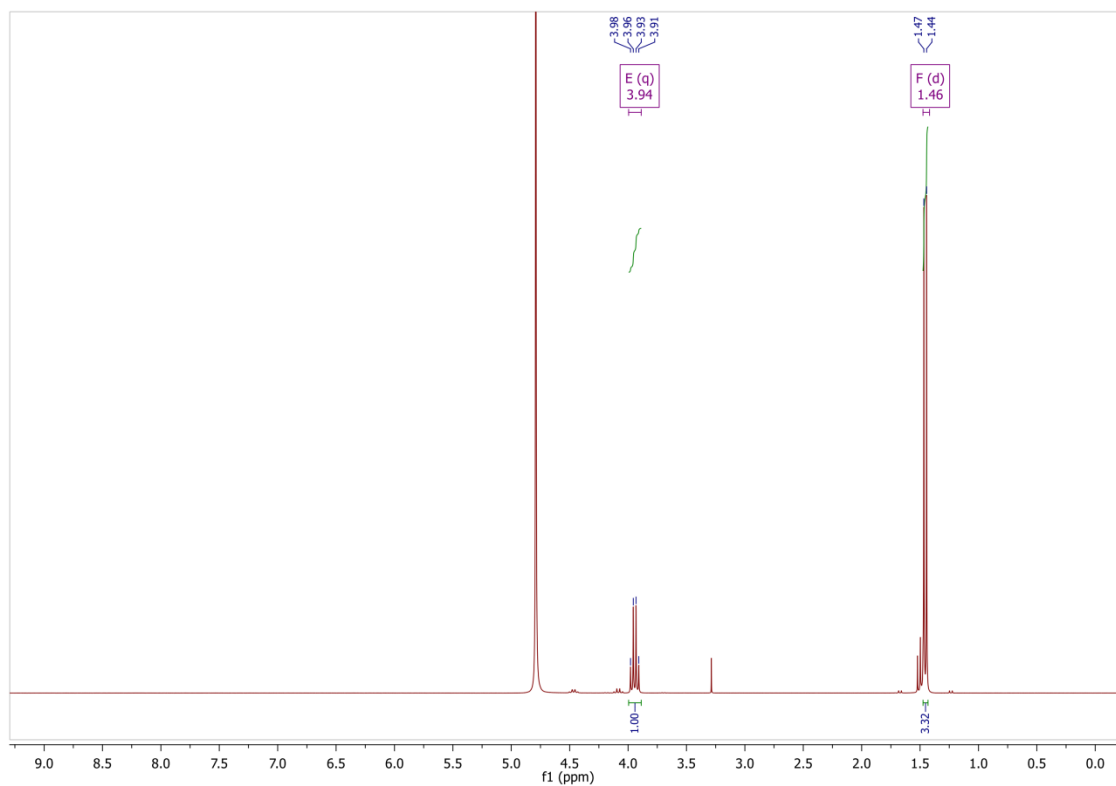

<sup>1</sup>H NMR spectrum of AlaHA (D<sub>2</sub>O + 1.8% TFA, 300 MHz).

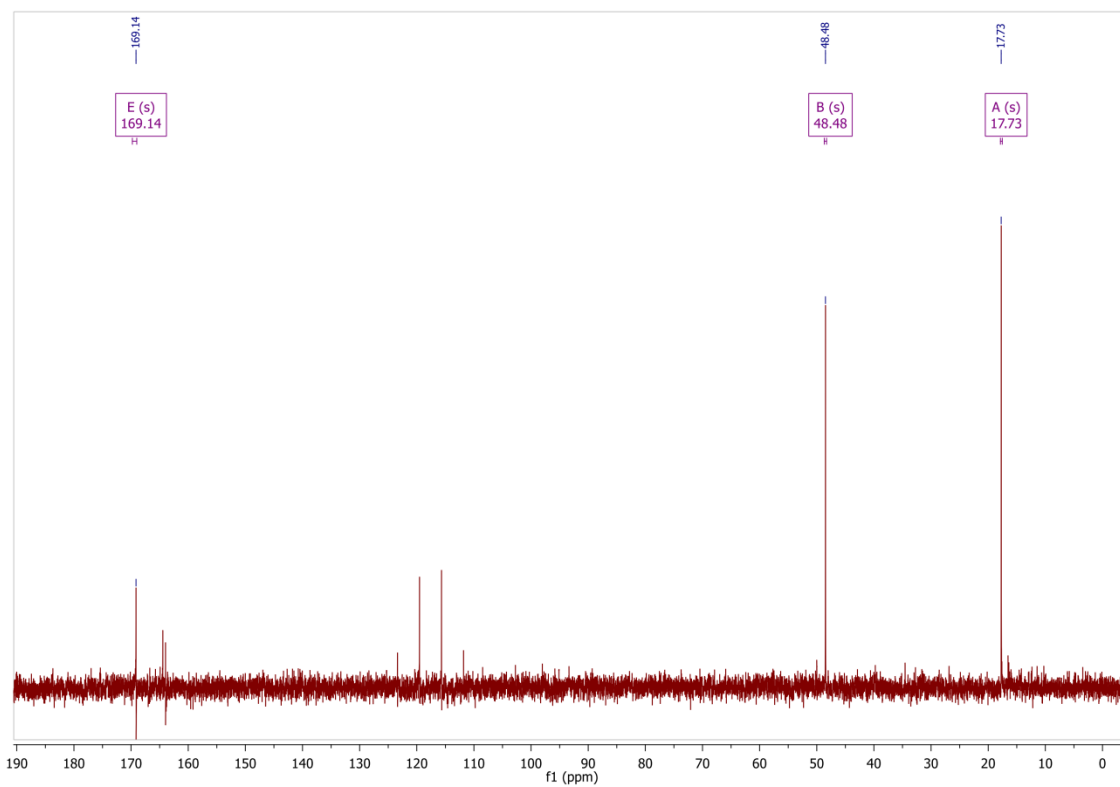

<sup>13</sup>C NMR spectrum of AlaHA (D<sub>2</sub>O + 1.8% TFA, 75 MHz).

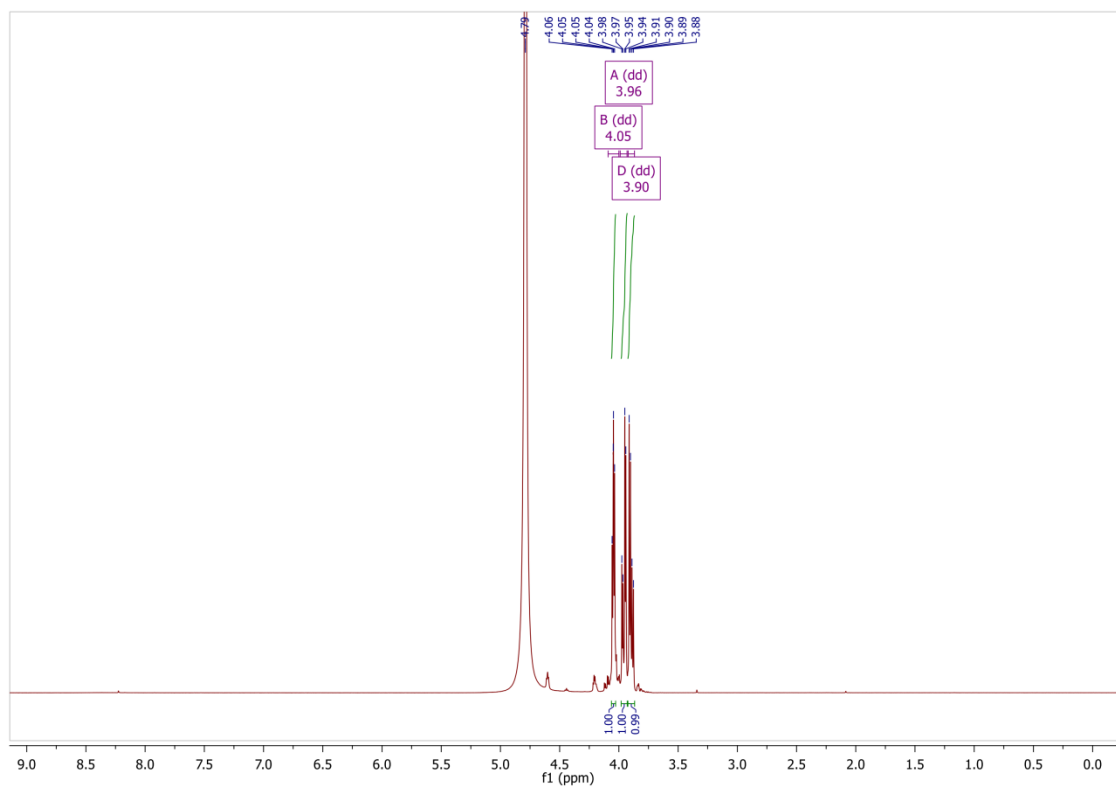

<sup>1</sup>H NMR spectrum of SerHA (D<sub>2</sub>O + 1.8% TFA, 500 MHz).

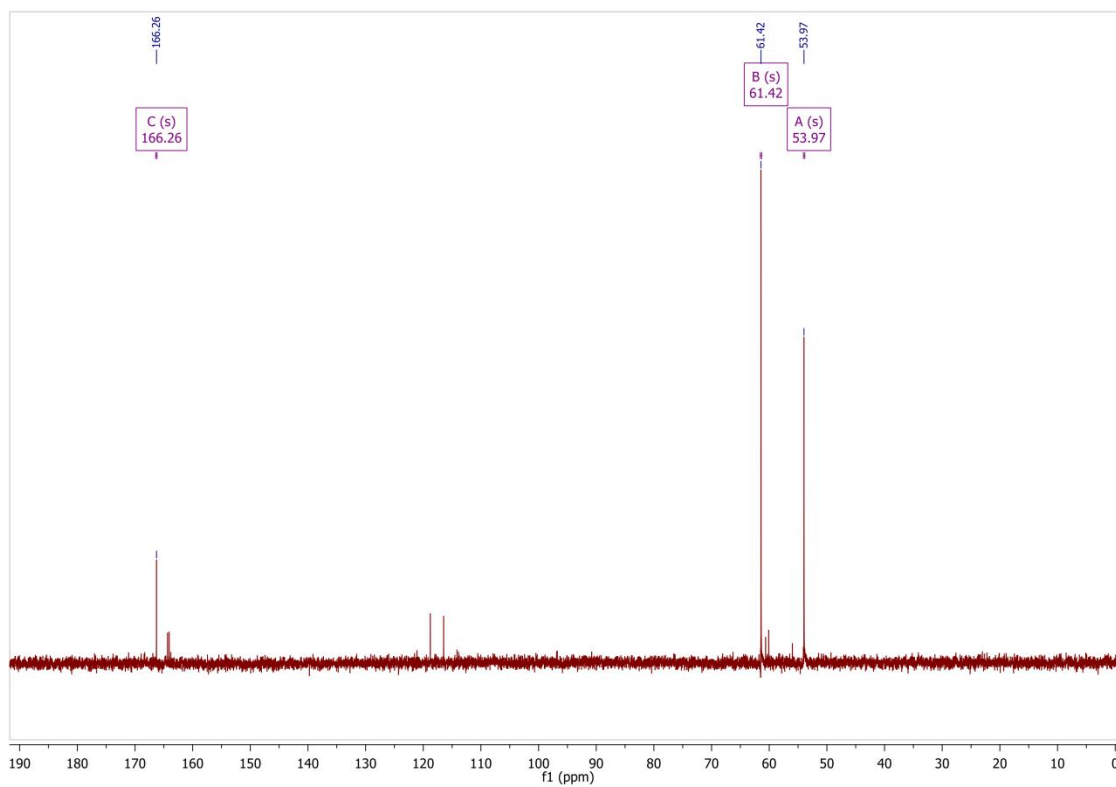

<sup>13</sup>C NMR spectrum of SerHA (D<sub>2</sub>O + 1.8% TFA, 126 MHz).



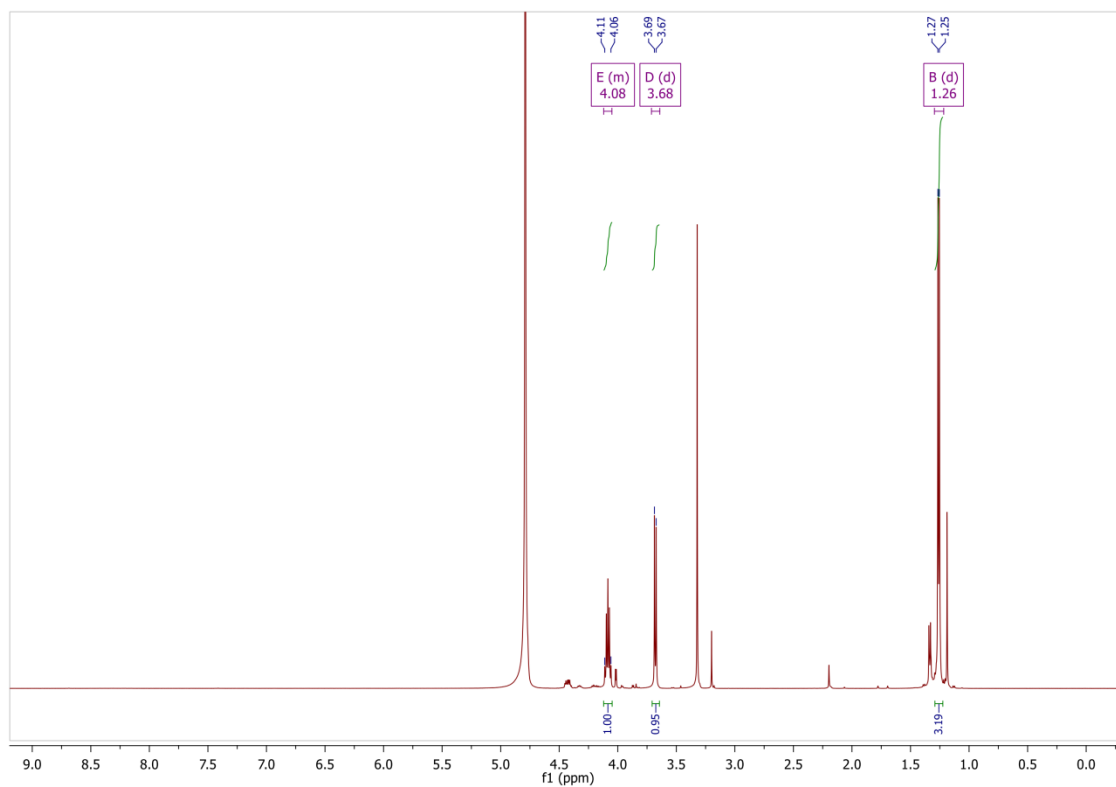

<sup>1</sup>H NMR spectrum of ThrHA (D<sub>2</sub>O + 1.8% TFA, 500 MHz).

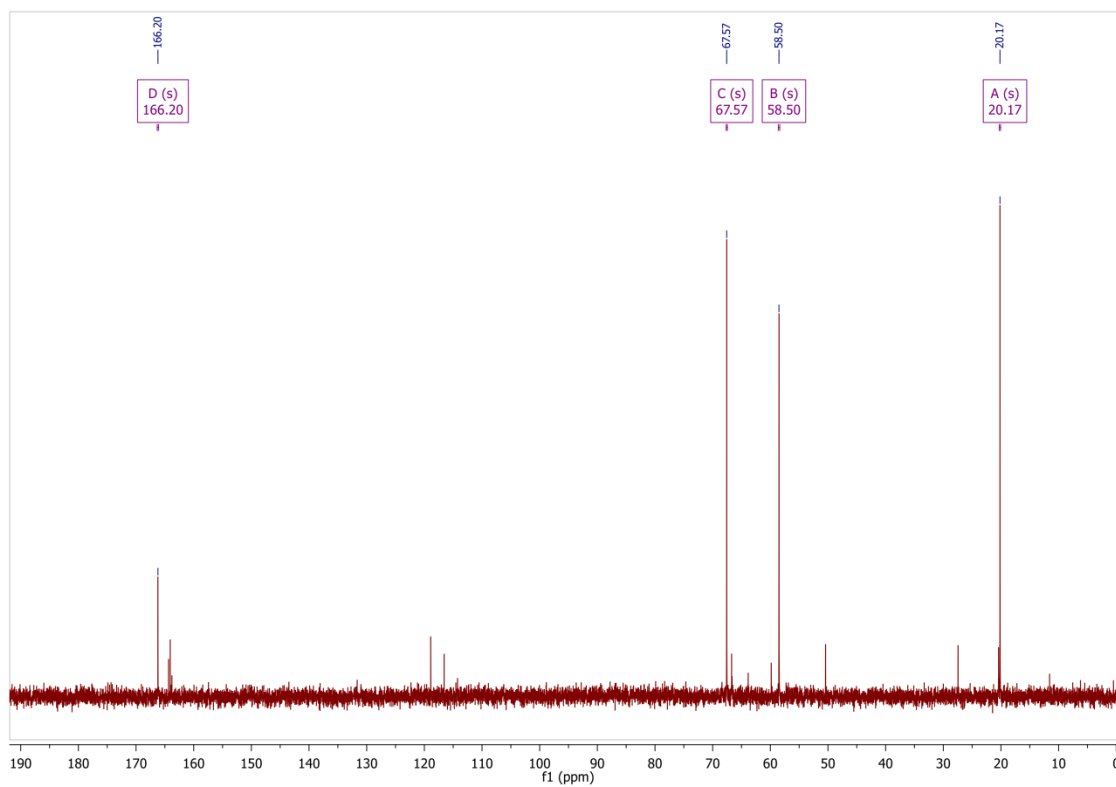

<sup>13</sup>C NMR spectrum of ThrHA (D<sub>2</sub>O + 1.8% TFA, 126 MHz).

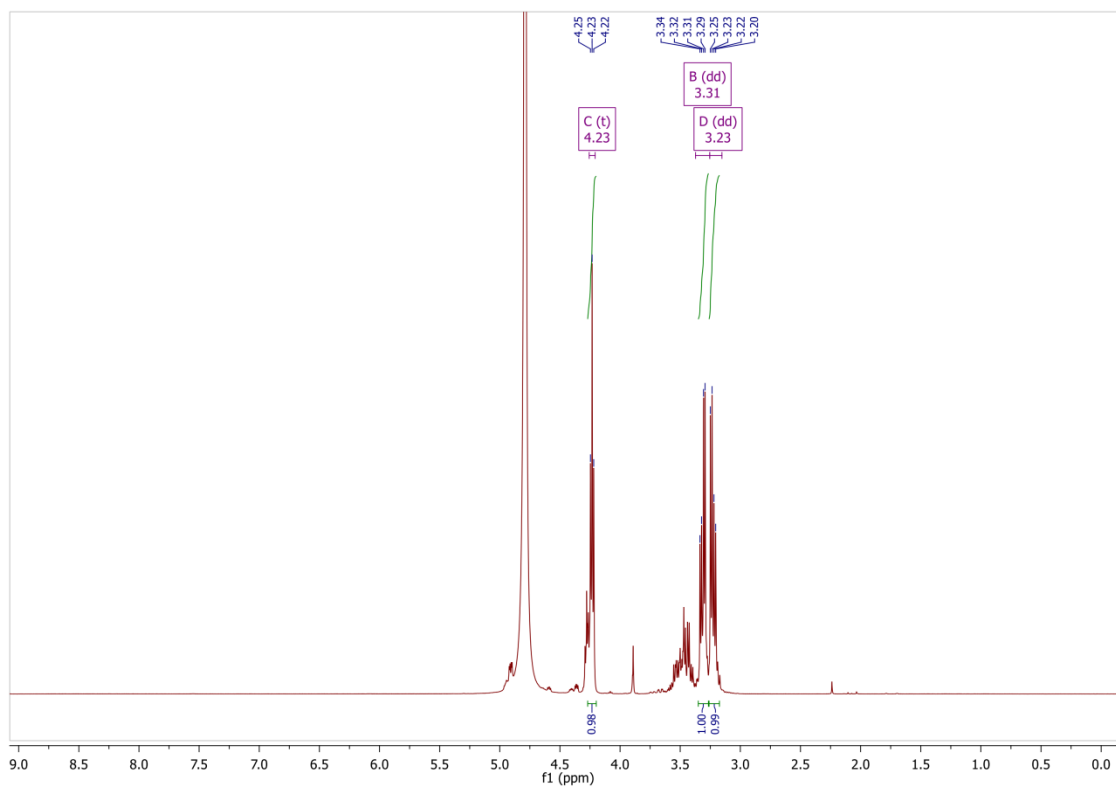

<sup>1</sup>H NMR spectrum of cystine hydroxamate (D<sub>2</sub>O + 1.8% TFA, 500 MHz).

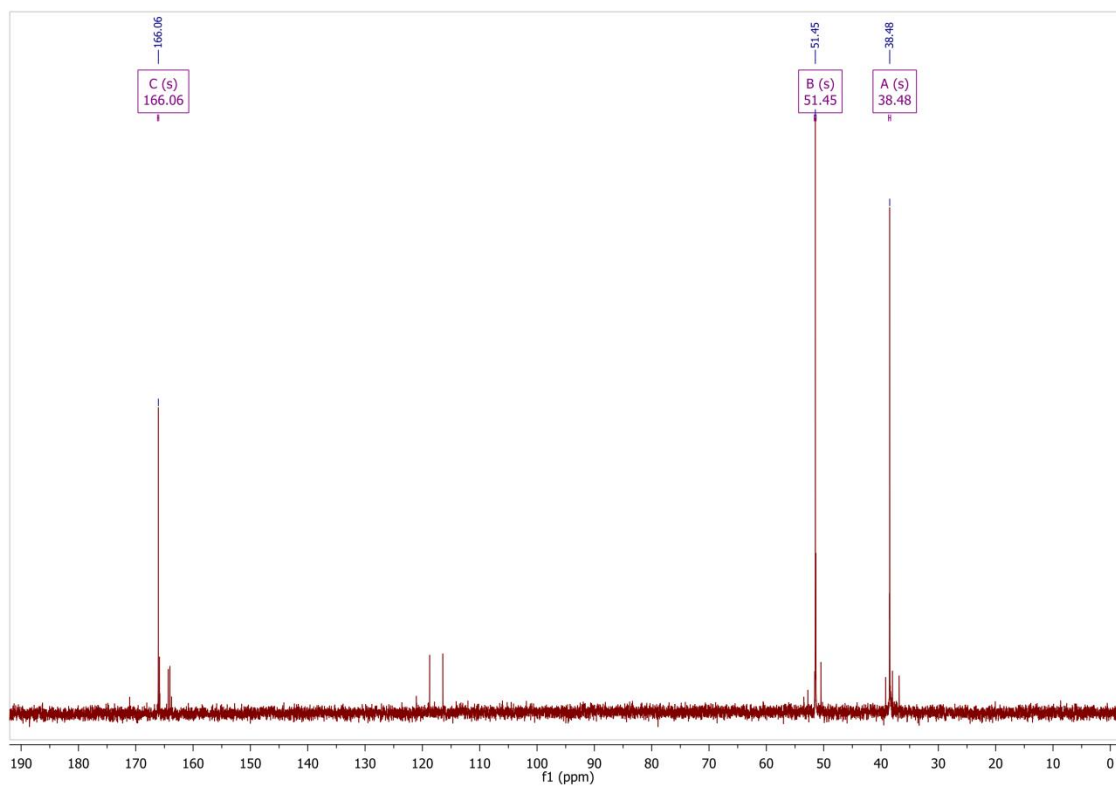

<sup>13</sup>C NMR spectrum of cystine hydroxamate (D<sub>2</sub>O + 1.8% TFA, 126 MHz).

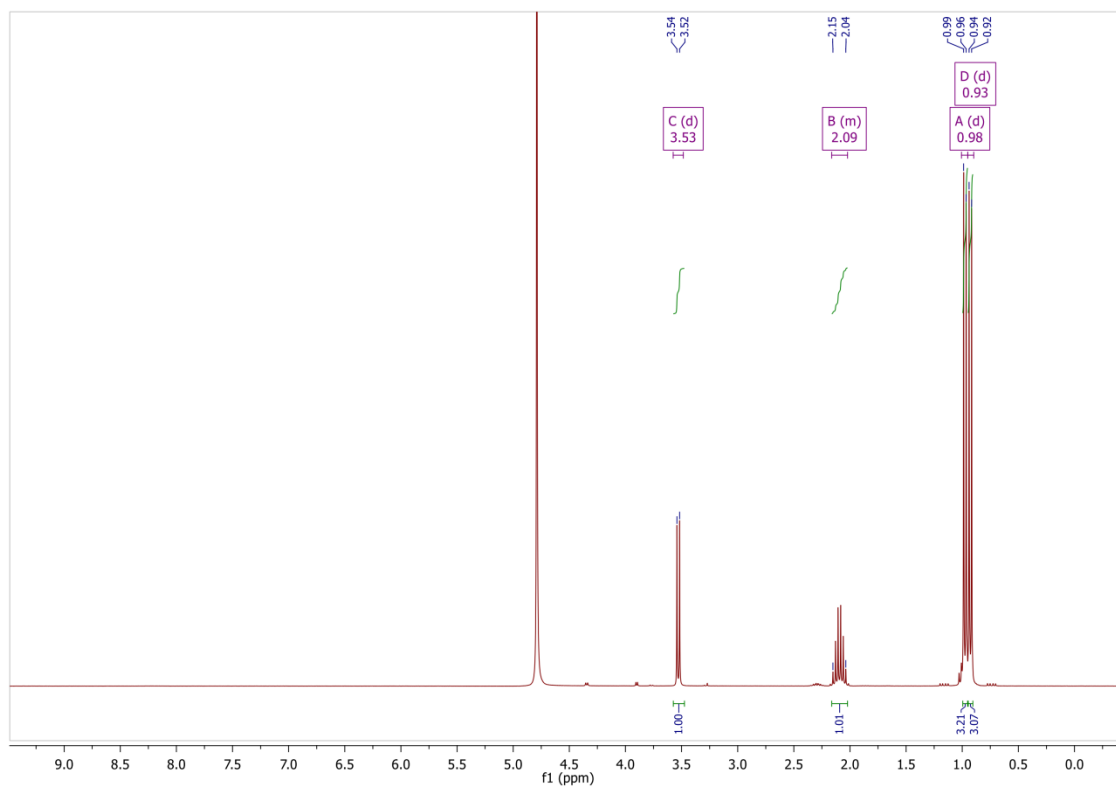

<sup>1</sup>H NMR spectrum of ValHA (D<sub>2</sub>O + 1.8% TFA, 300 MHz).

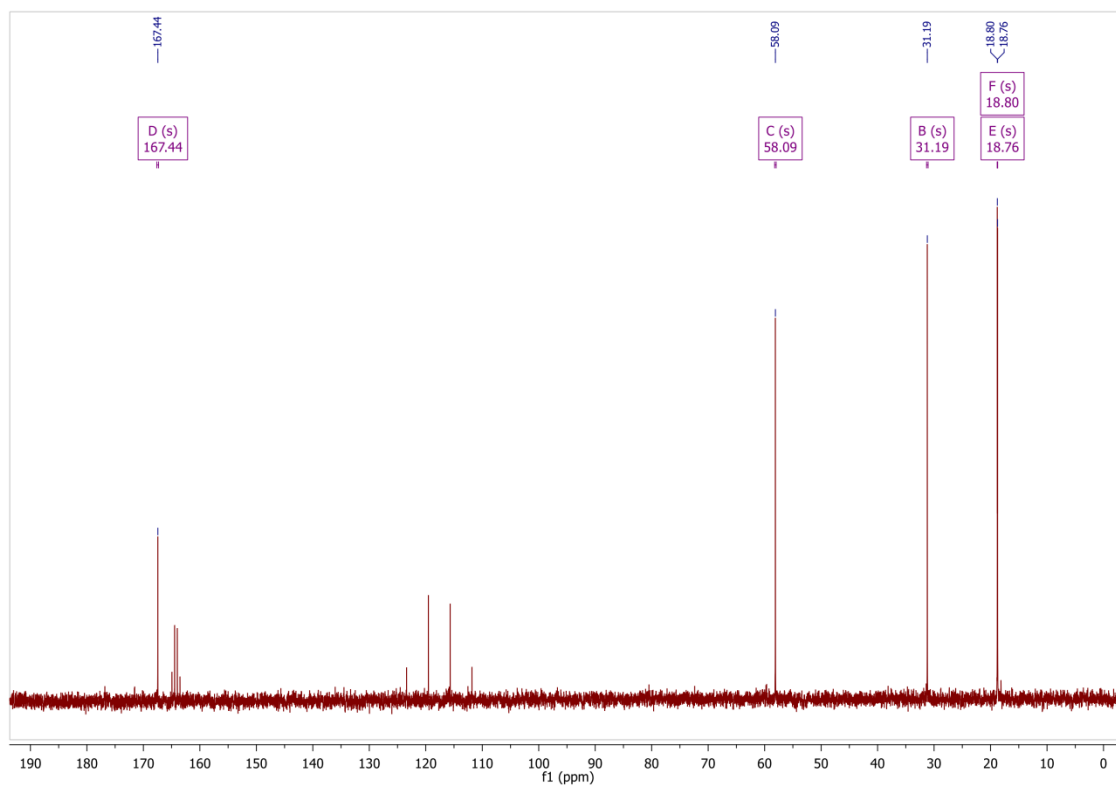

<sup>13</sup>C NMR spectrum of ValHA (D<sub>2</sub>O + 1.8% TFA, 75 MHz).

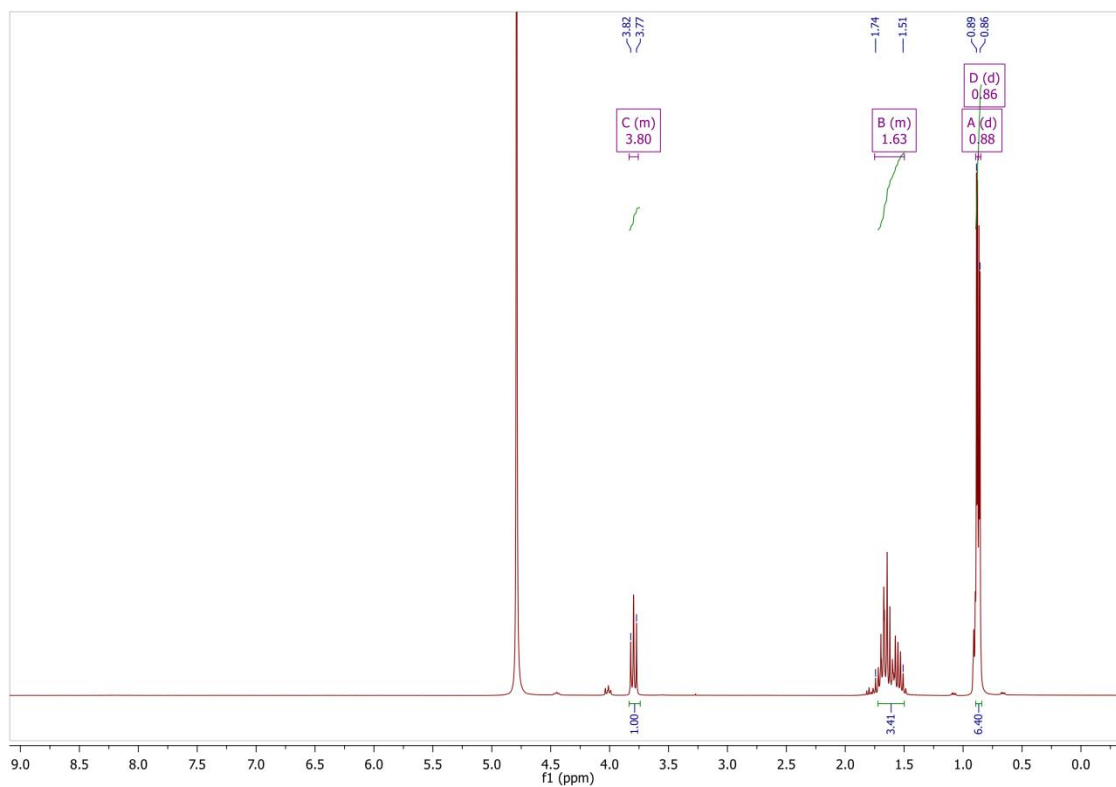

<sup>1</sup>H NMR spectrum of LeuHA (D<sub>2</sub>O + 1.8% TFA, 300 MHz).

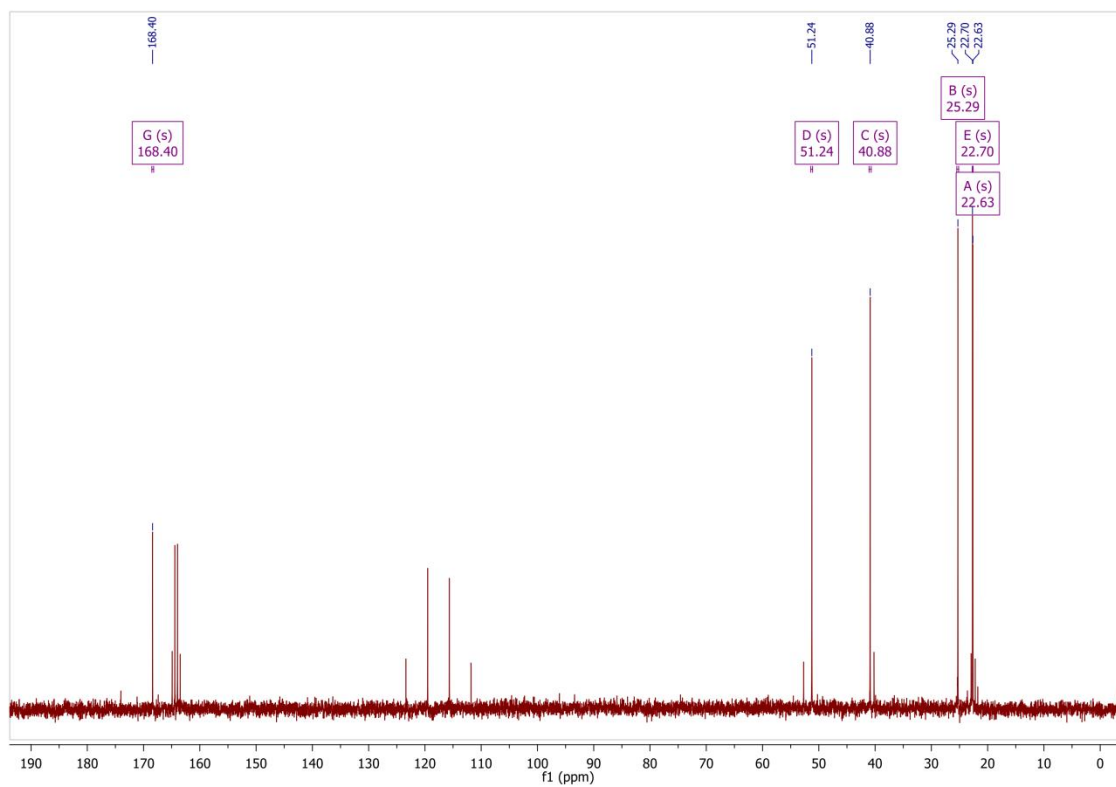

<sup>13</sup>C NMR spectrum of LeuHA (D<sub>2</sub>O + 1.8% TFA, 75 MHz).

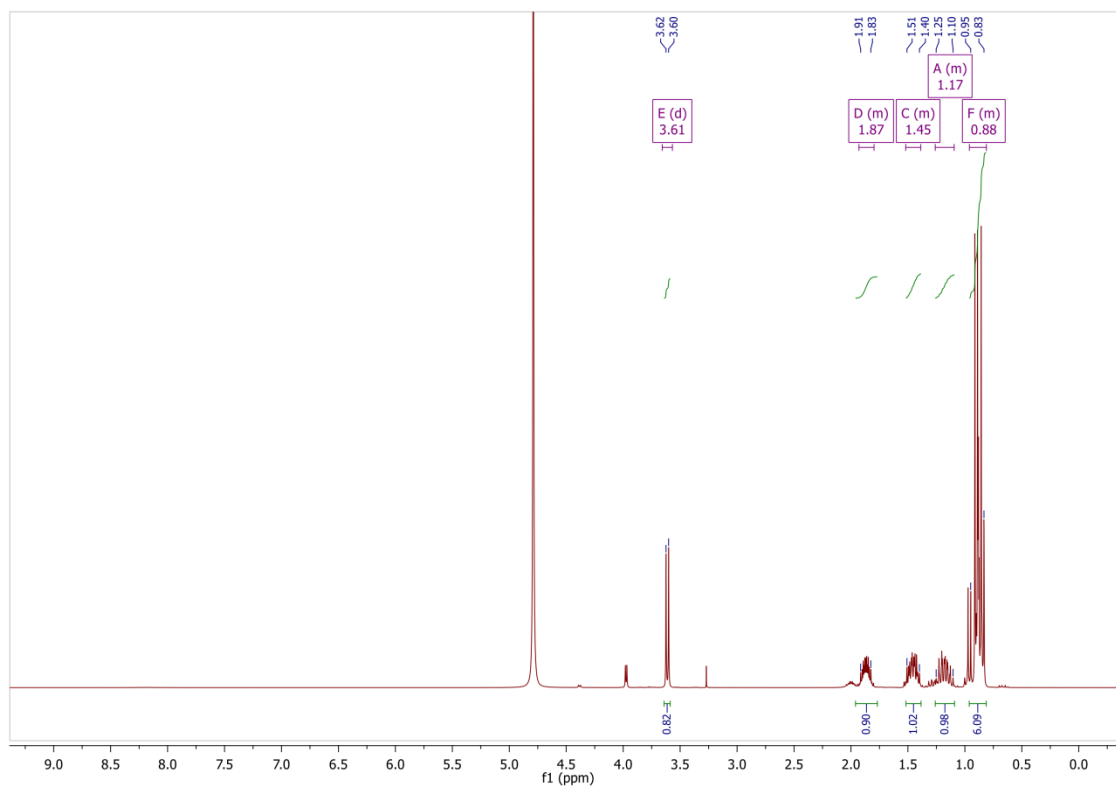

<sup>1</sup>H NMR spectrum of IleHA (D<sub>2</sub>O + 1.8% TFA, 300 MHz).

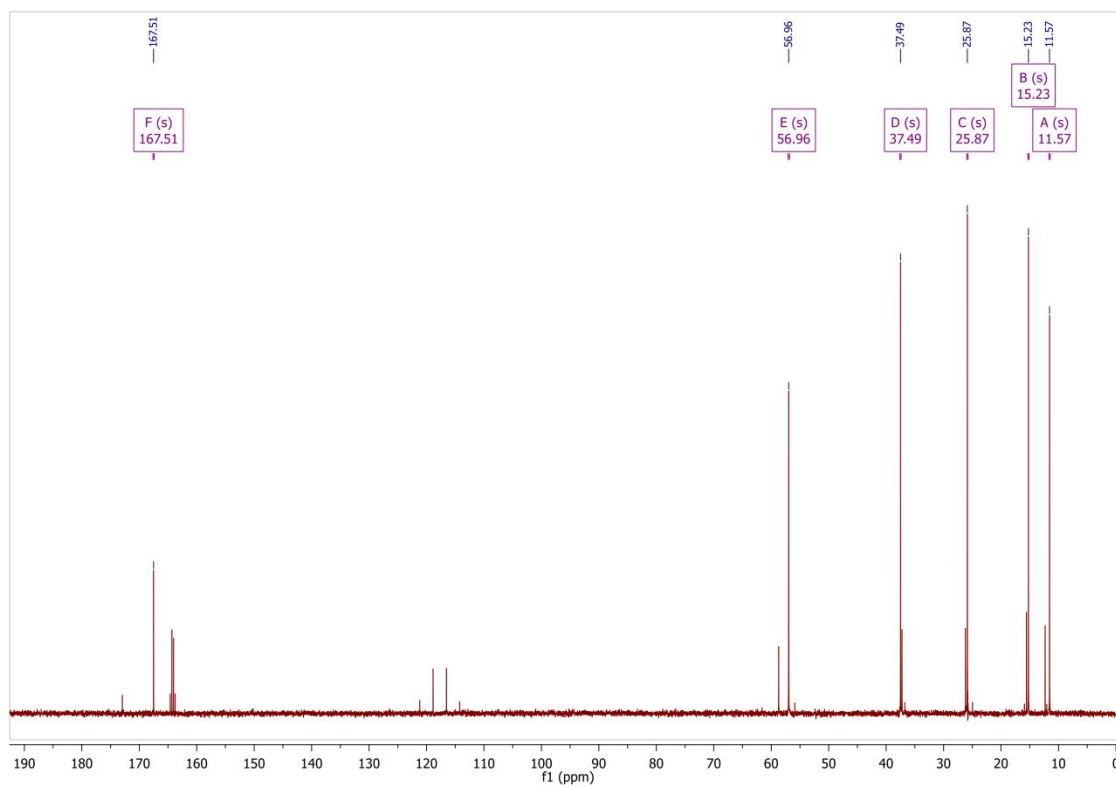

<sup>13</sup>C NMR spectrum of IleHA (D<sub>2</sub>O + 1.8% TFA, 126 MHz).

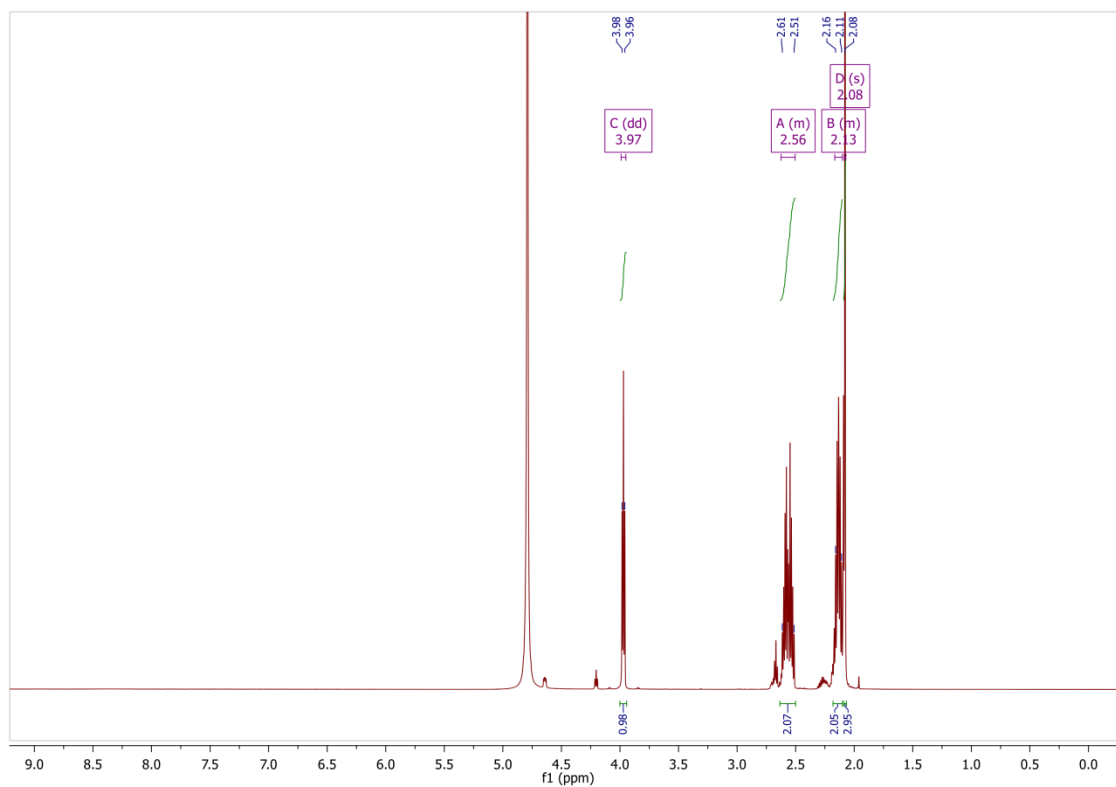

<sup>1</sup>H NMR spectrum of MethA (D<sub>2</sub>O + 1.8% TFA, 600 MHz).

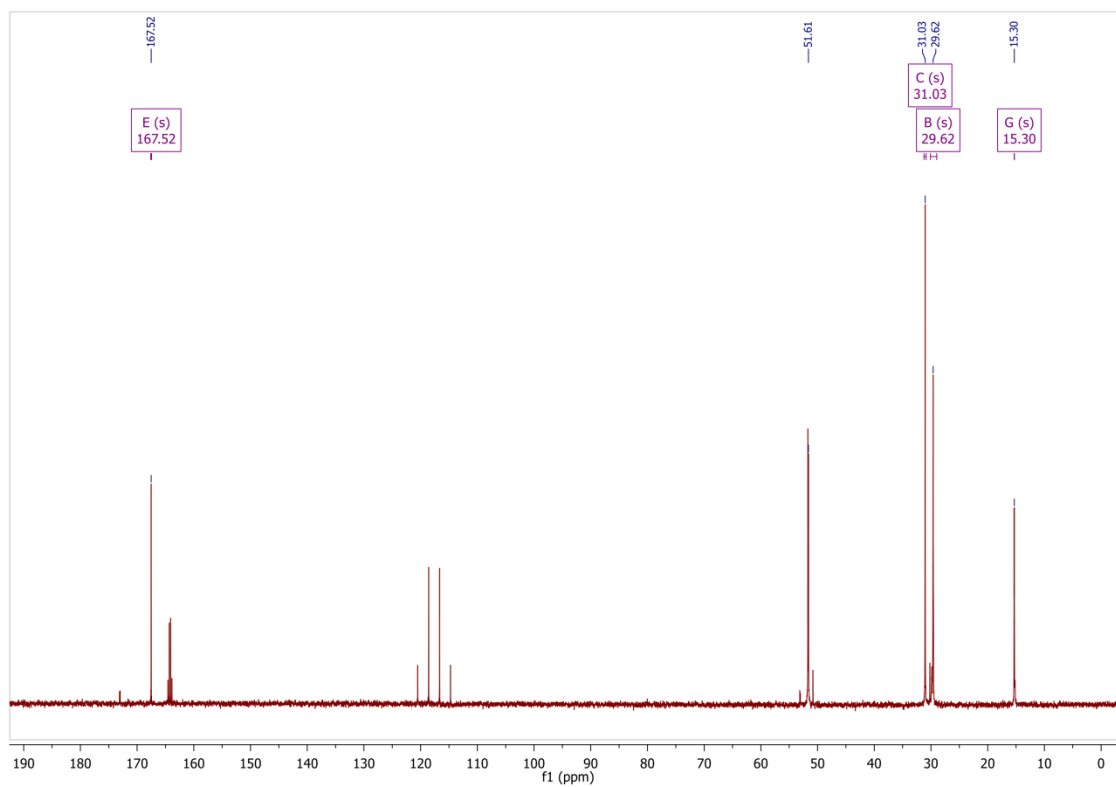

<sup>13</sup>C NMR spectrum of MethA (D<sub>2</sub>O + 1.8% TFA, 151 MHz).

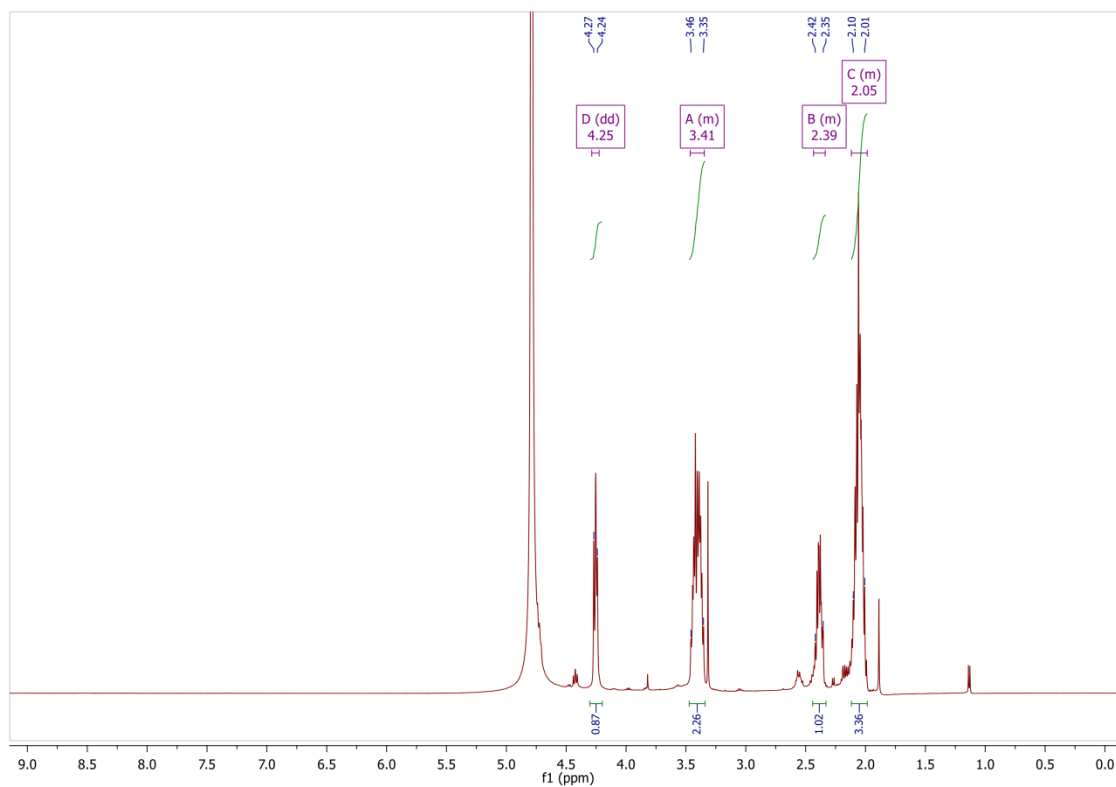

<sup>1</sup>H NMR spectrum of ProHA (D<sub>2</sub>O + 1.8% TFA, 500 MHz).

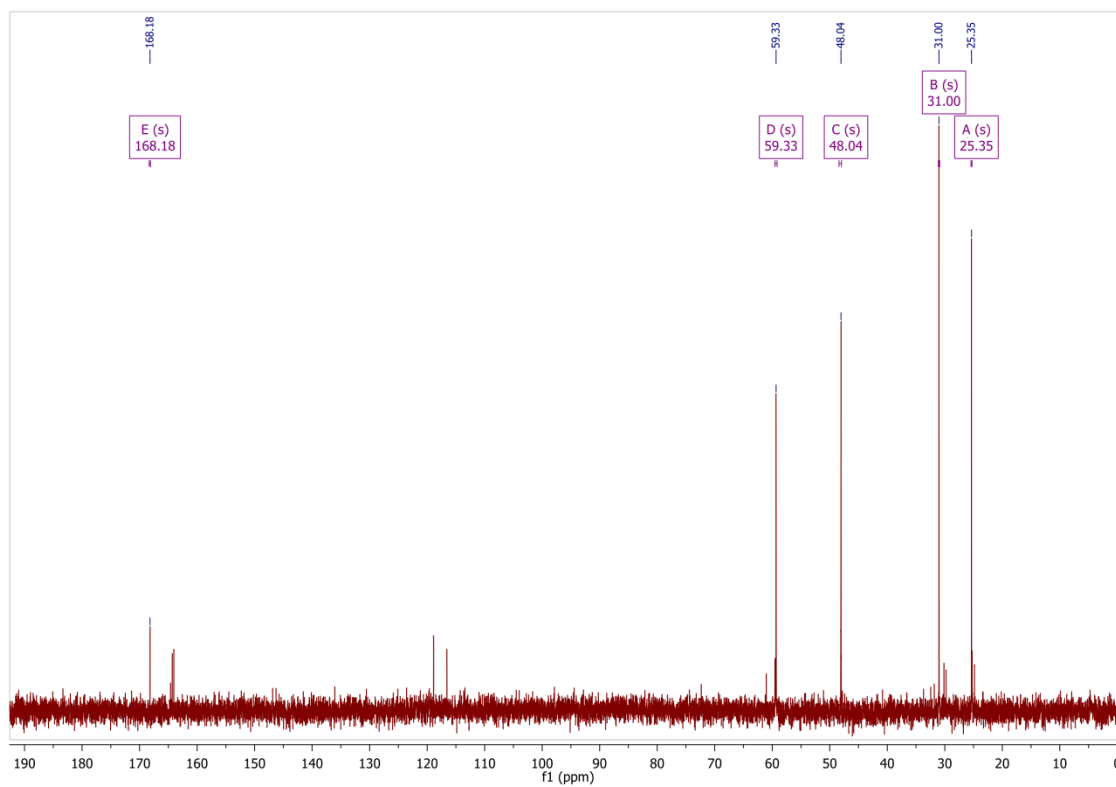

<sup>13</sup>C NMR spectrum of ProHA (D<sub>2</sub>O + 1.8% TFA, 126 MHz).

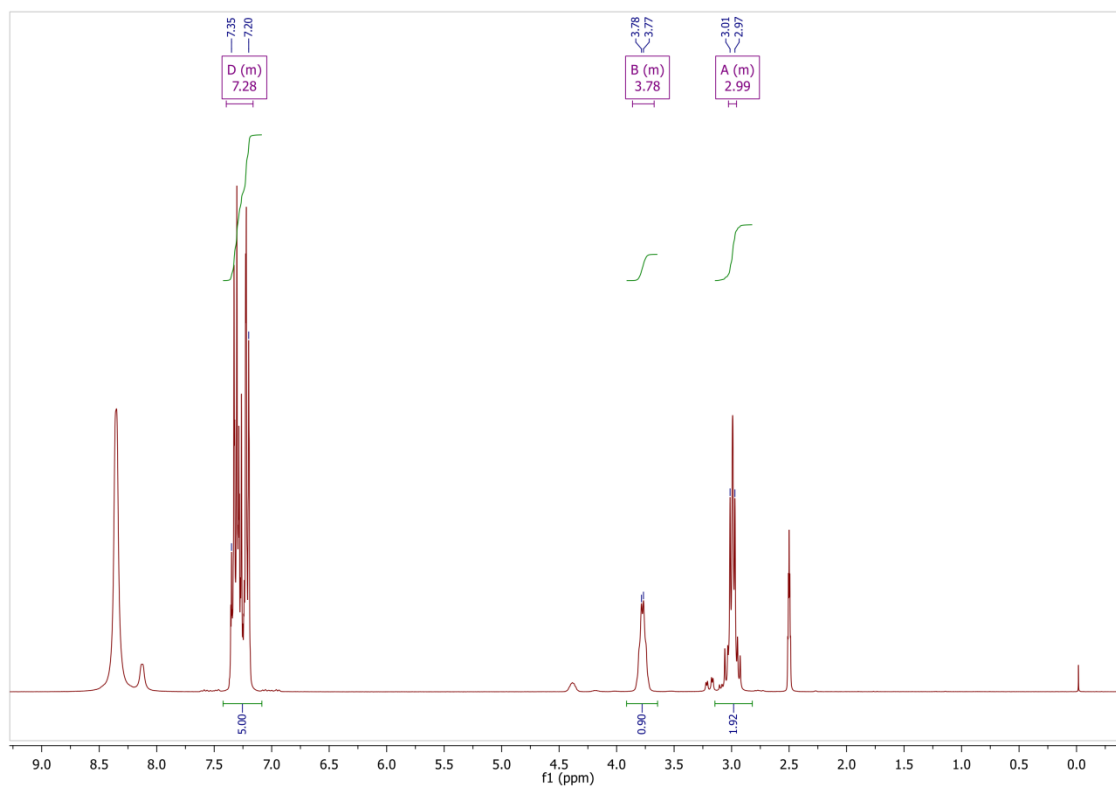

<sup>1</sup>H NMR spectrum of PheHA (DMSO, 300 MHz).

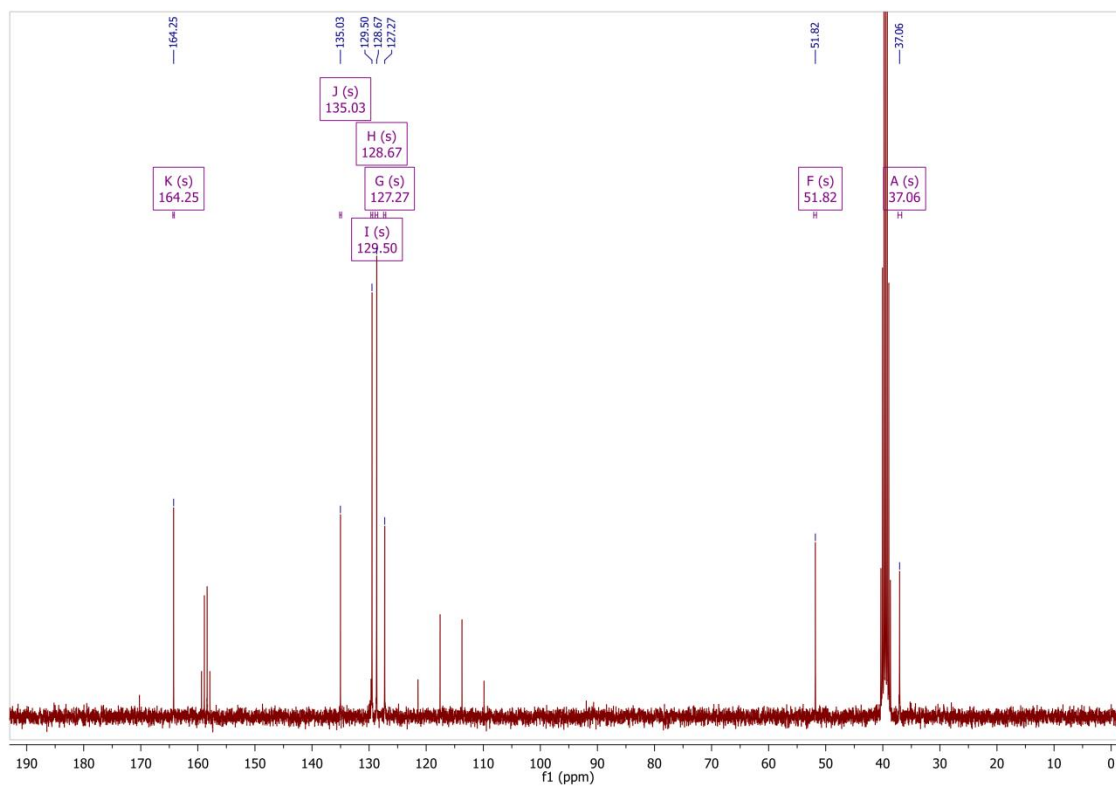

<sup>13</sup>C NMR spectrum of PheHA (DMSO, 126 MHz).



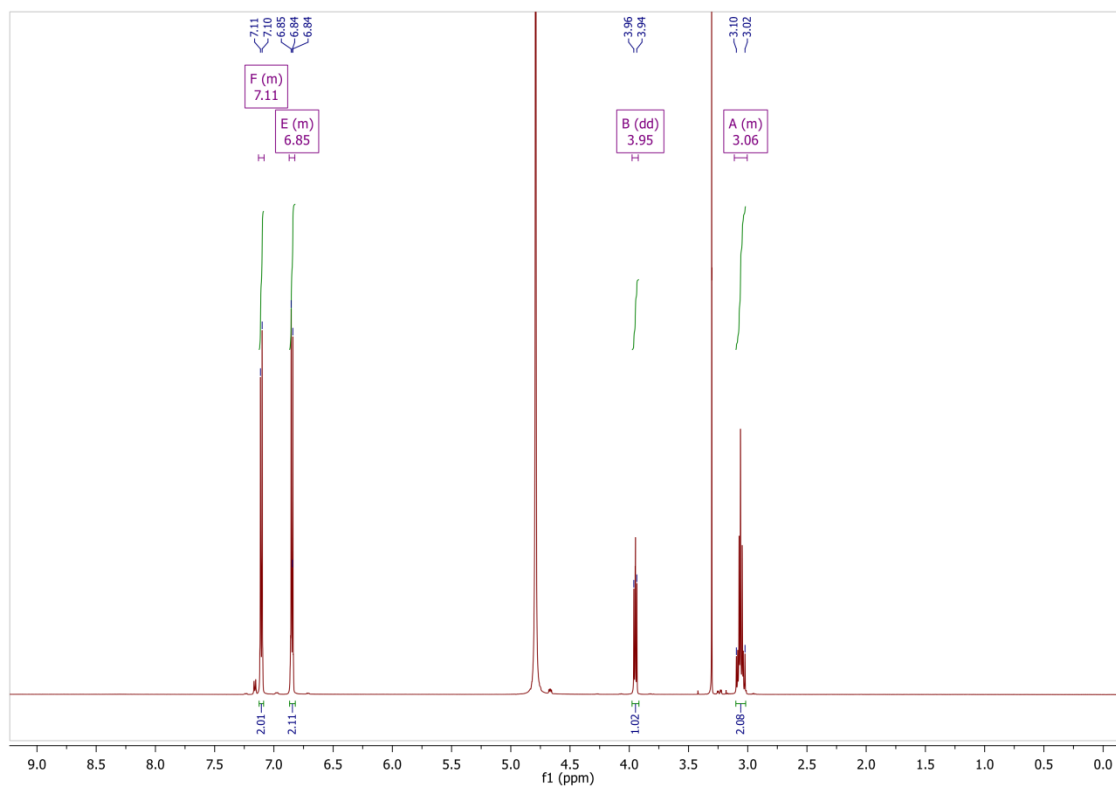

<sup>1</sup>H NMR spectrum of TyrHA (D<sub>2</sub>O + 1.8% TFA, 600 MHz).

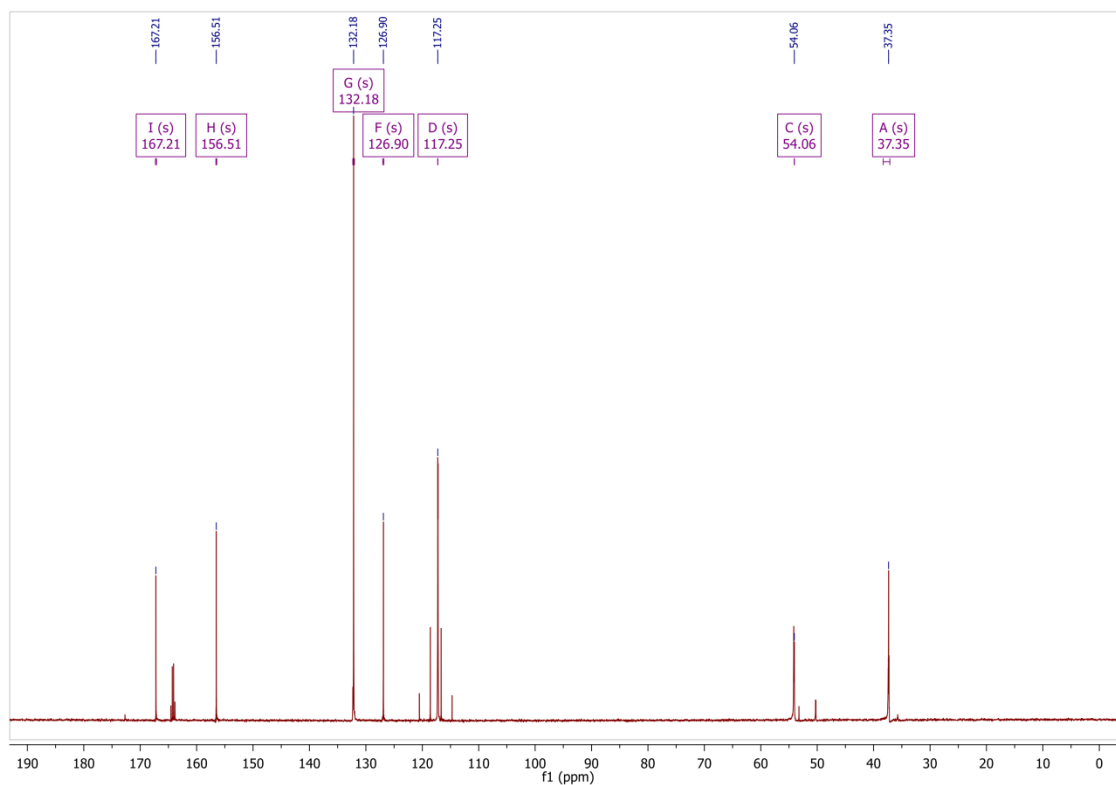

<sup>13</sup>C NMR spectrum of TyrHA (D<sub>2</sub>O + 1.8% TFA, 151 MHz).

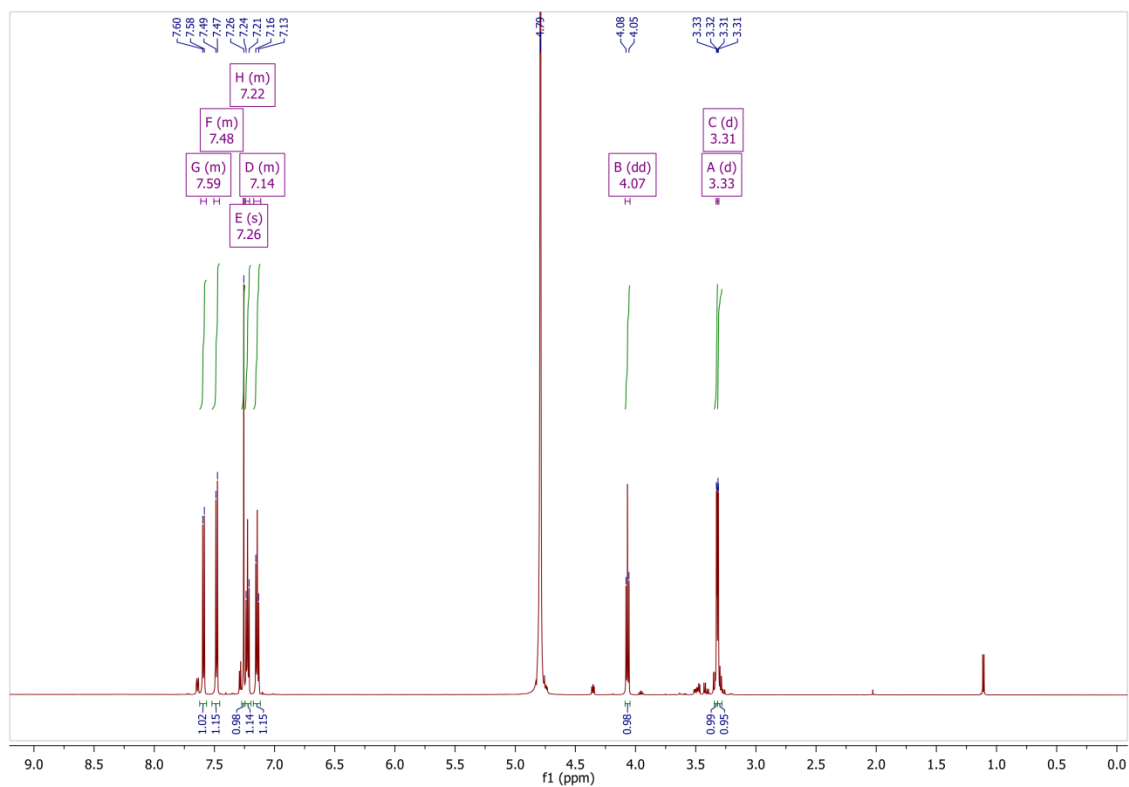

<sup>1</sup>H NMR spectrum of TrpHA (D<sub>2</sub>O + 1.8% TFA, 600 MHz).

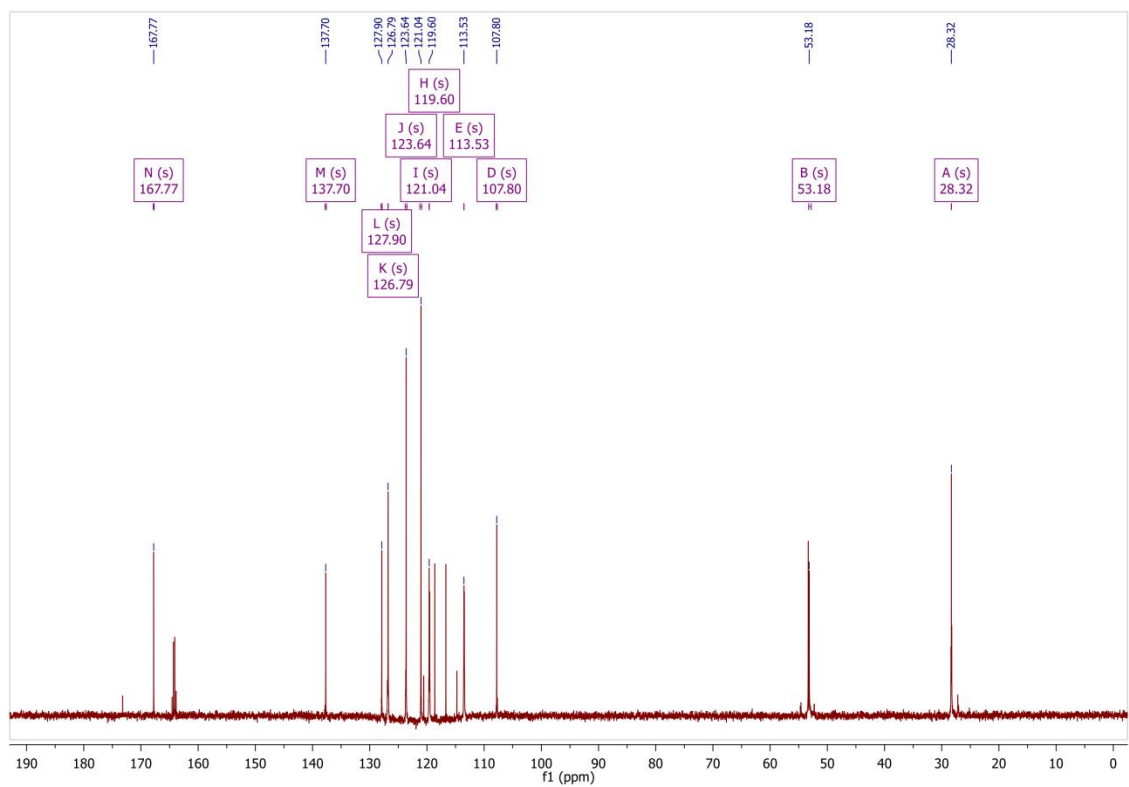

<sup>13</sup>C NMR spectrum of TrpHA (D<sub>2</sub>O + 1.8% TFA, 151 MHz).

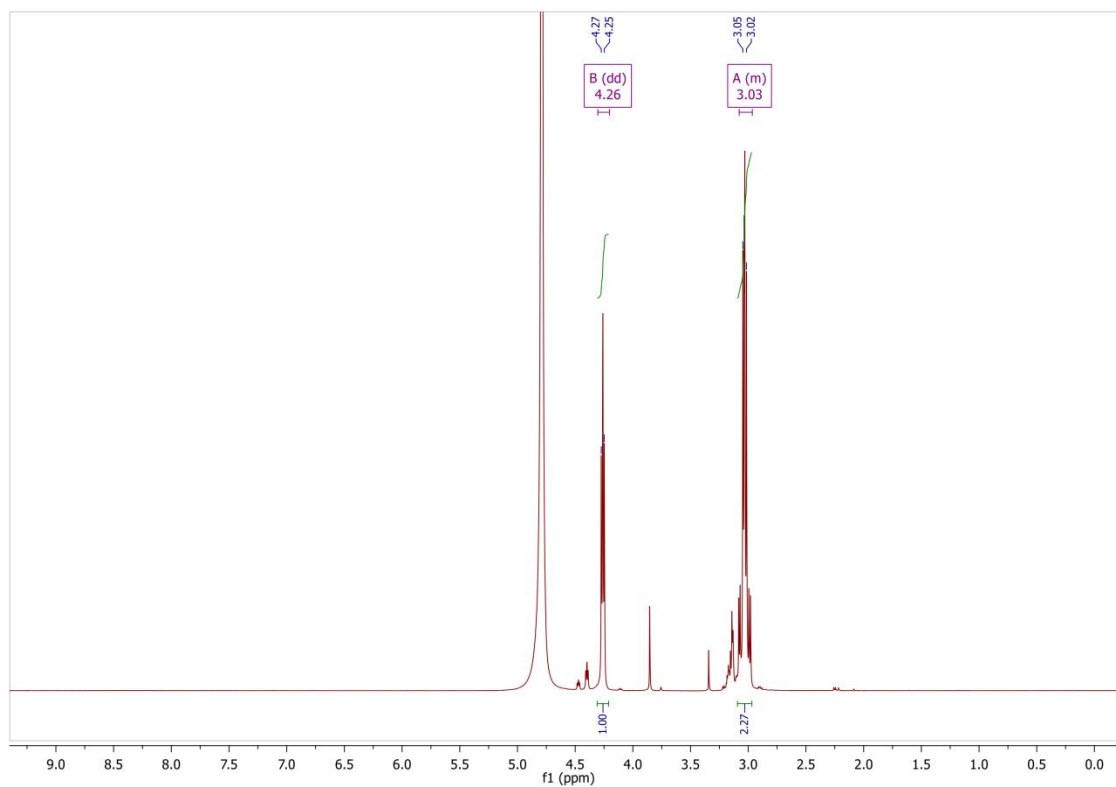

<sup>1</sup>H NMR spectrum of AspHA (D<sub>2</sub>O + 1.8% TFA, 500 MHz).

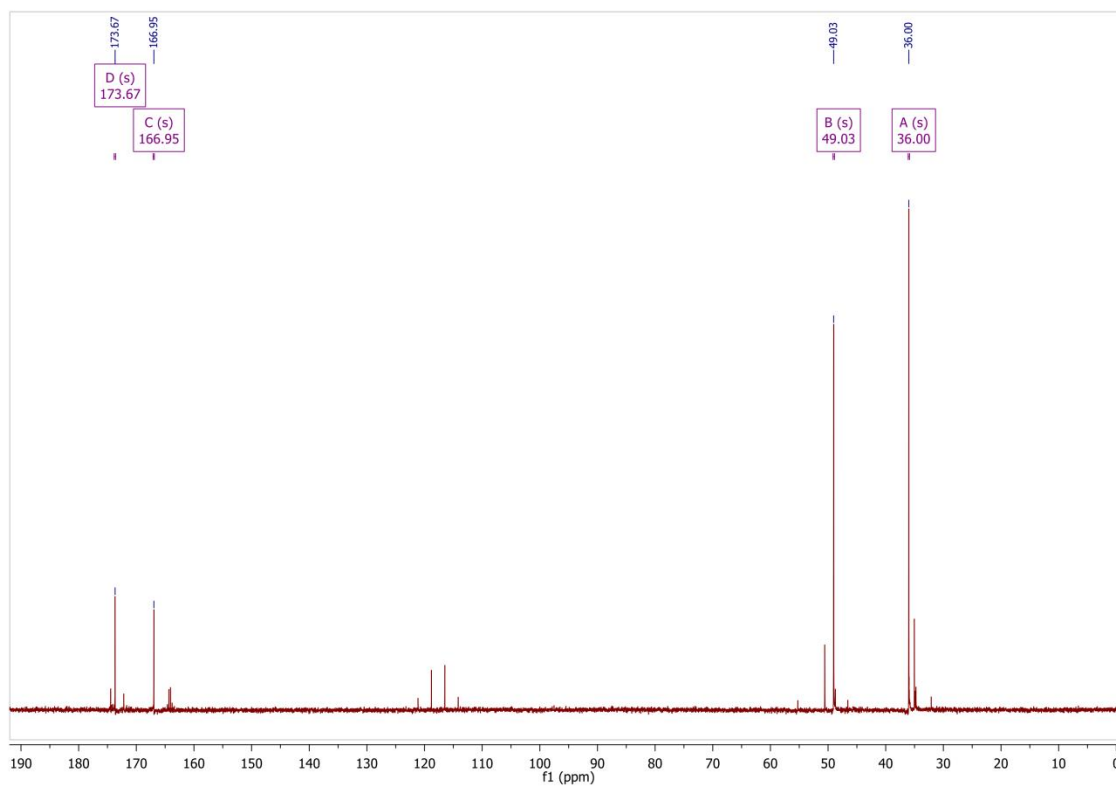

<sup>13</sup>C NMR spectrum of AspHA (D<sub>2</sub>O + 1.8% TFA, 126 MHz).

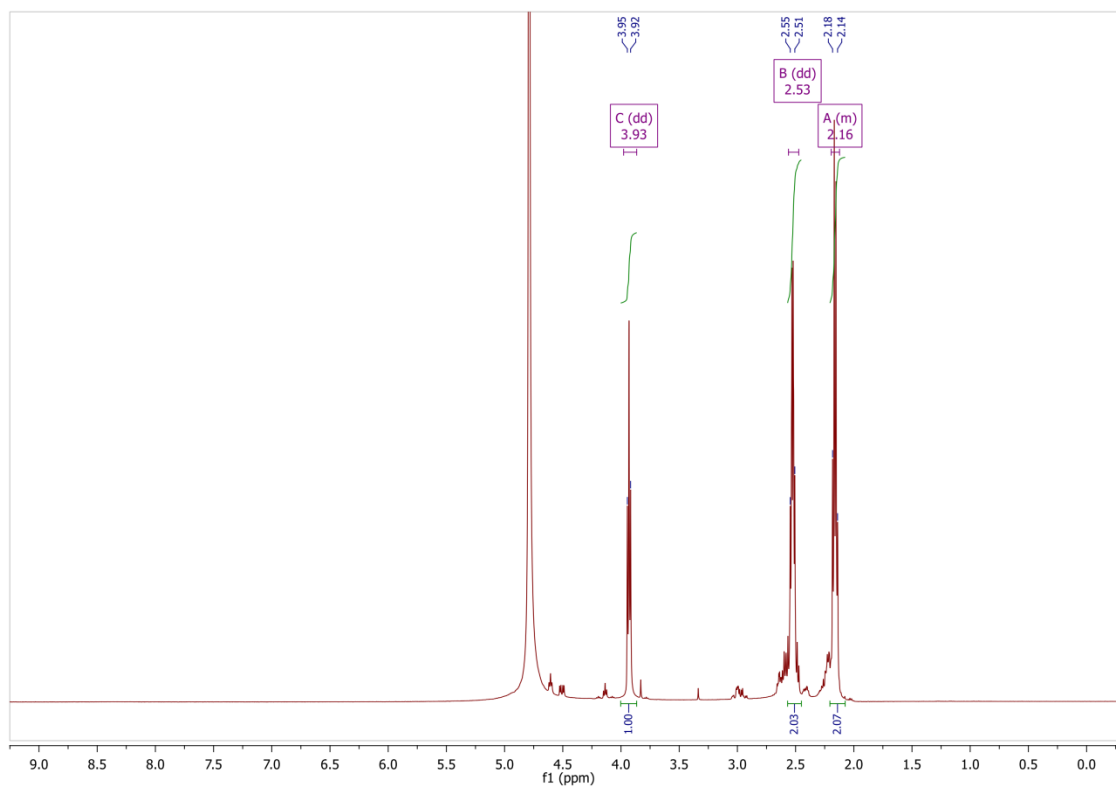

<sup>1</sup>H NMR spectrum of GluHA (D<sub>2</sub>O + 1.8% TFA, 500 MHz).

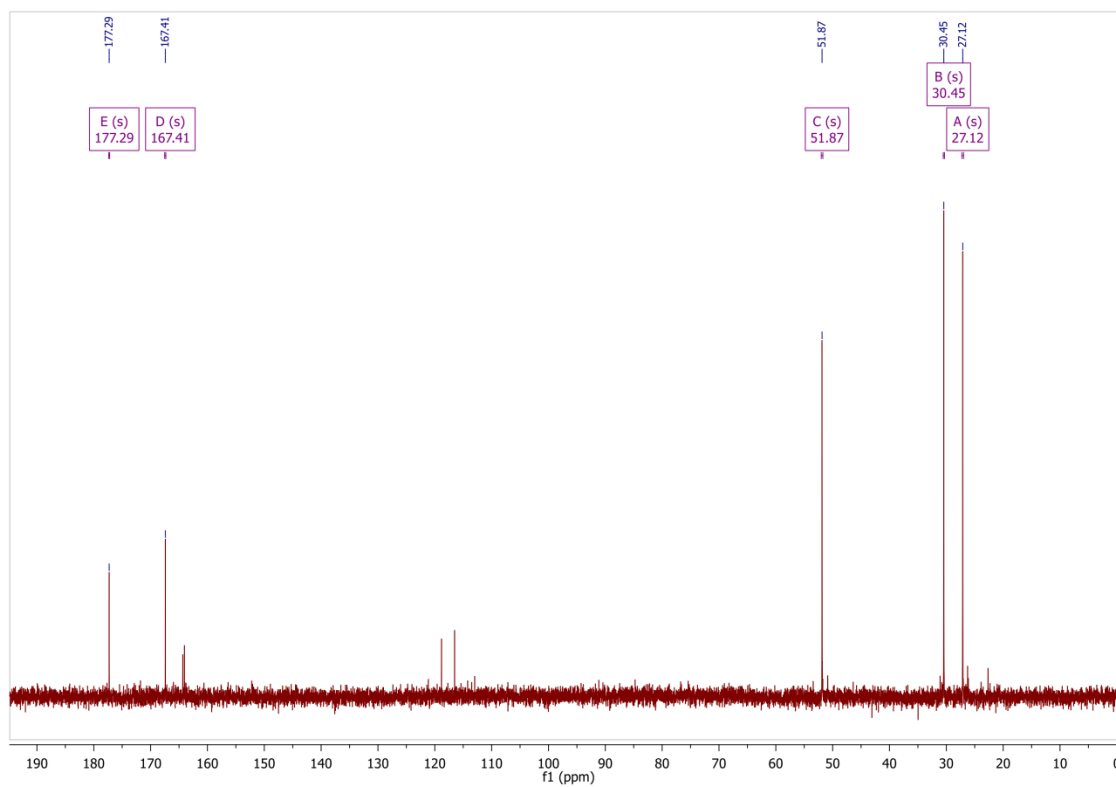

<sup>13</sup>C NMR spectrum of GluHA (D<sub>2</sub>O + 1.8% TFA, 126 MHz).

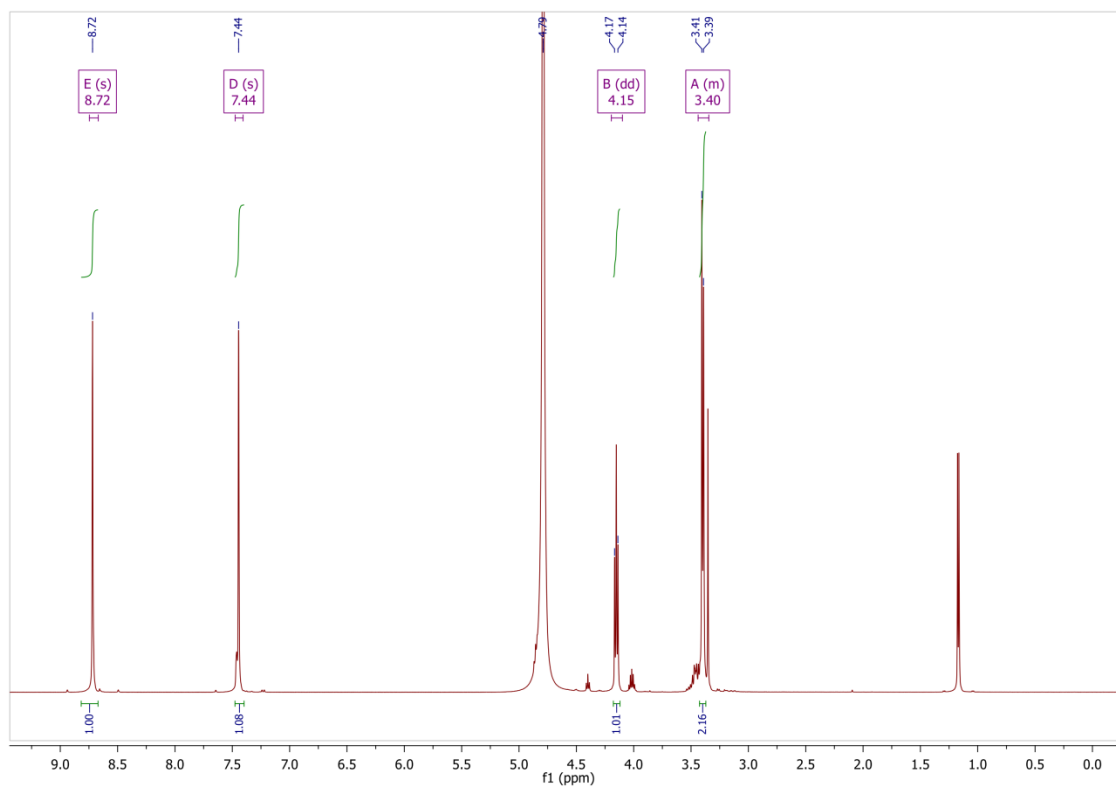

<sup>1</sup>H NMR spectrum of HisHA (D<sub>2</sub>O + 1.8% TFA, 500 MHz).

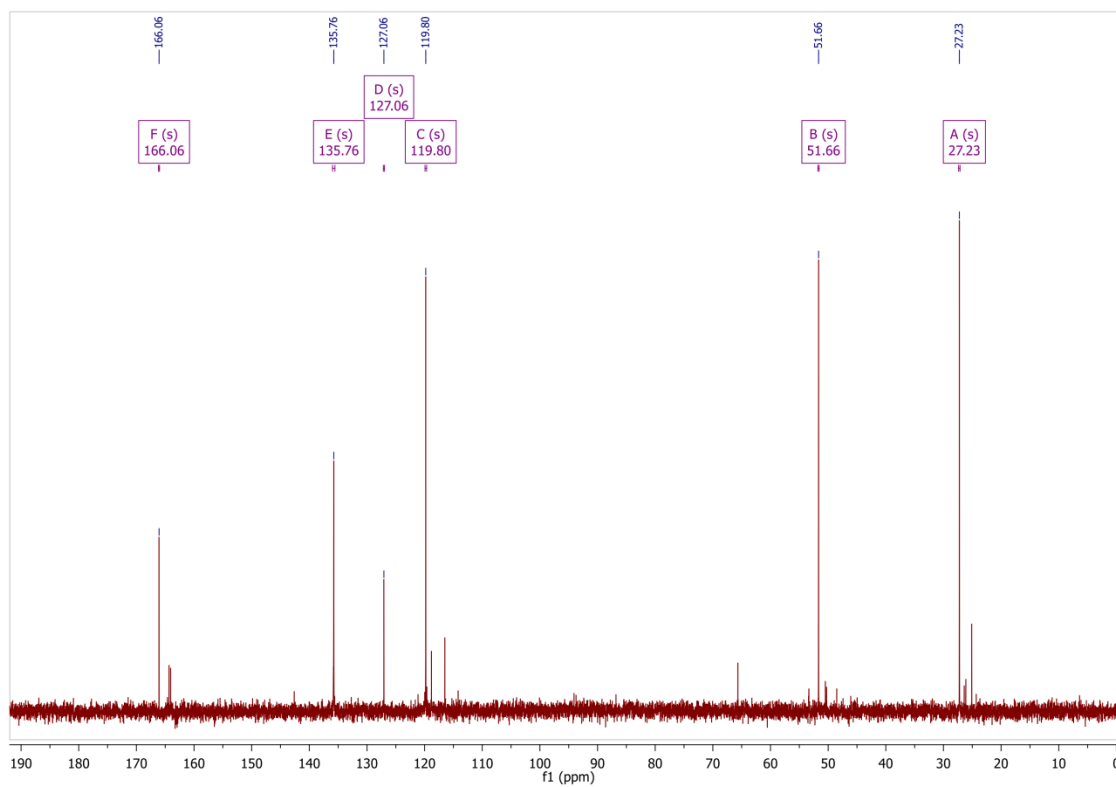

<sup>13</sup>C NMR spectrum of HisHA (D<sub>2</sub>O + 1.8% TFA, 126 MHz).

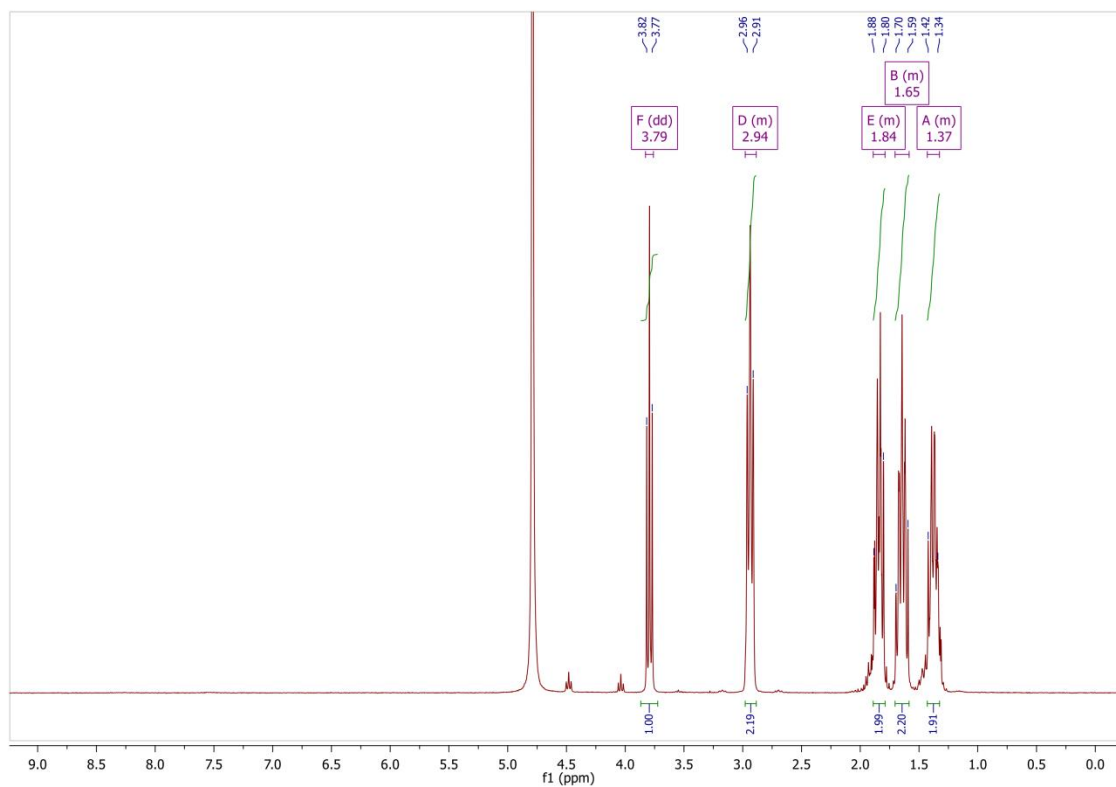

<sup>1</sup>H NMR spectrum of LysHA (D<sub>2</sub>O + 1.8% TFA, 300 MHz).

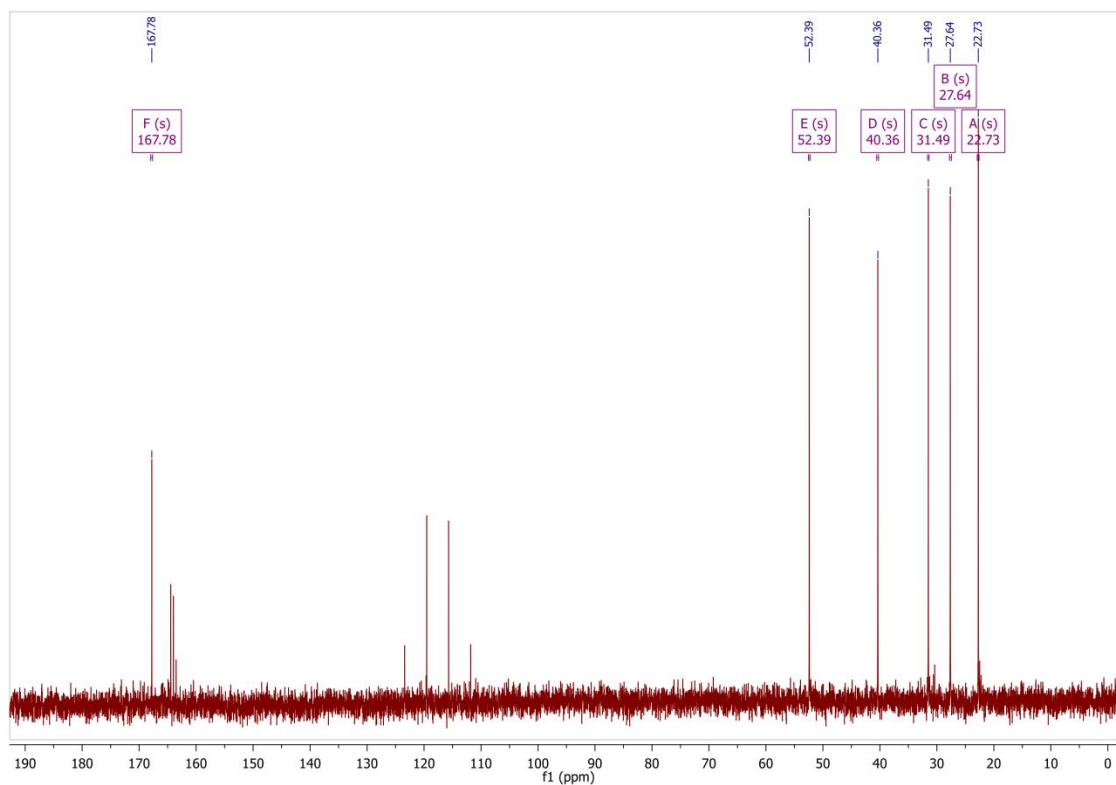

<sup>13</sup>C NMR spectrum of LysHA (D<sub>2</sub>O + 1.8% TFA, 75 MHz).

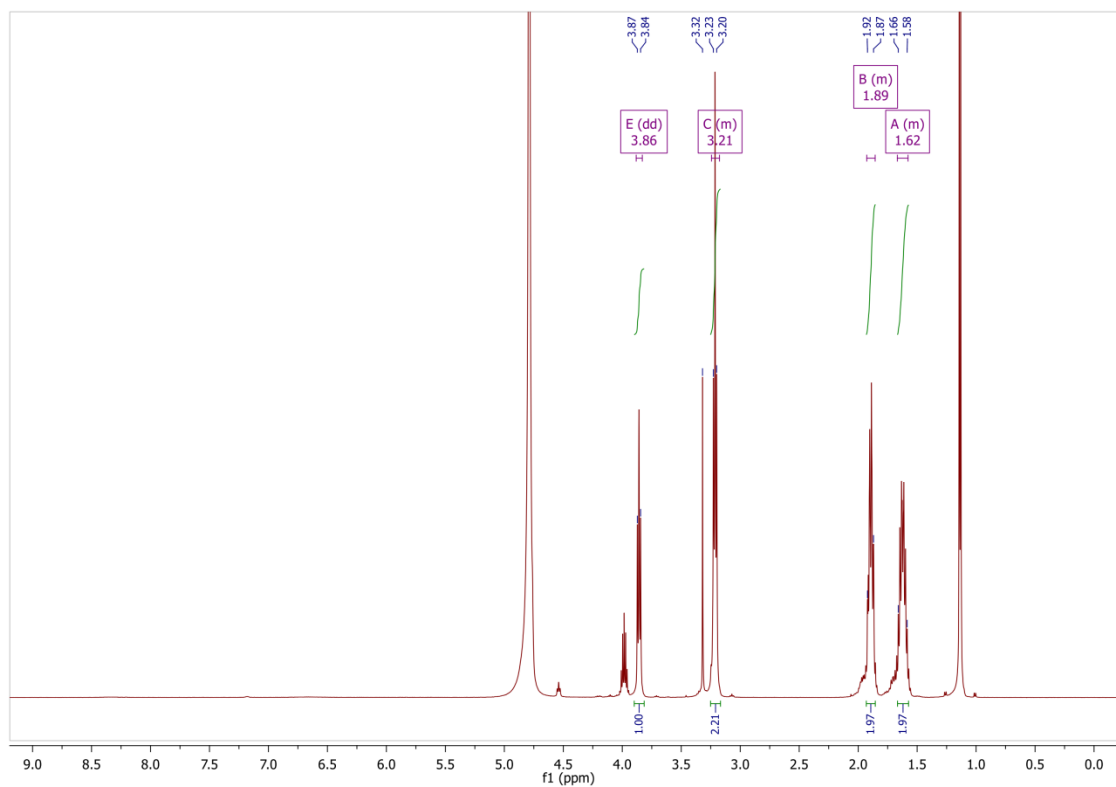

<sup>1</sup>H NMR spectrum of ArgHA (D<sub>2</sub>O + 1.8% TFA, 500 MHz).

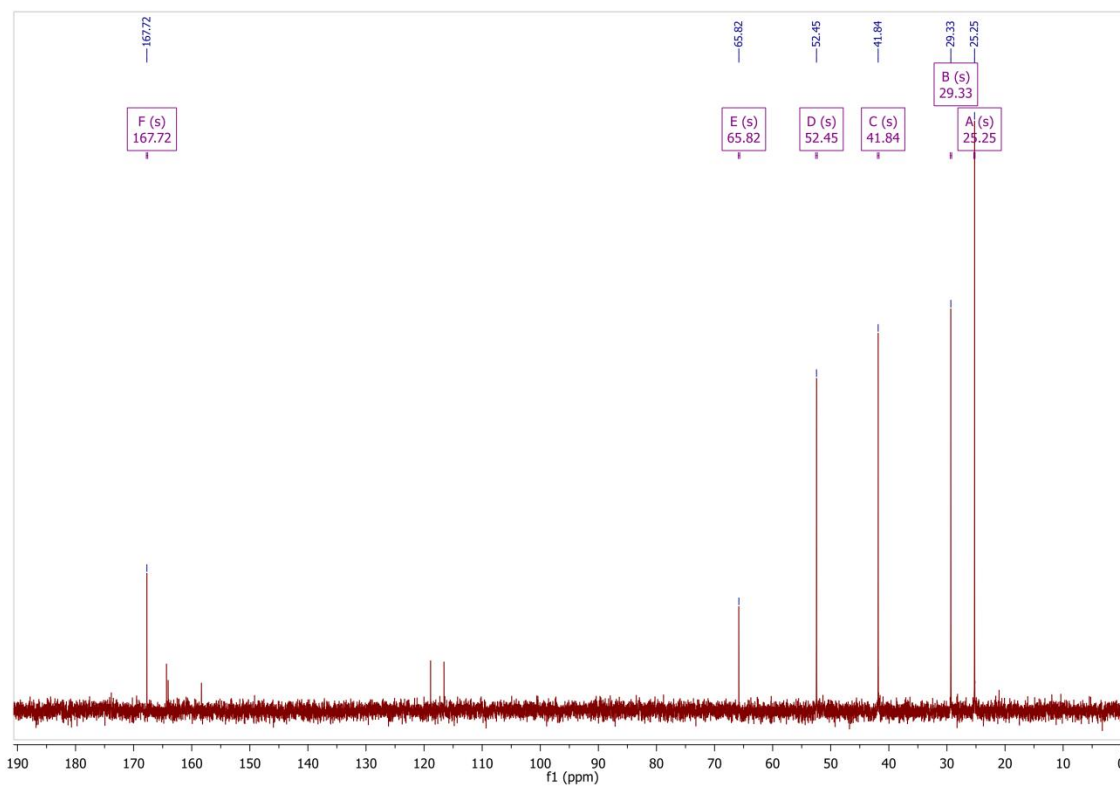

<sup>13</sup>C NMR spectrum of ArgHA (D<sub>2</sub>O + 1.8% TFA, 126 MHz).

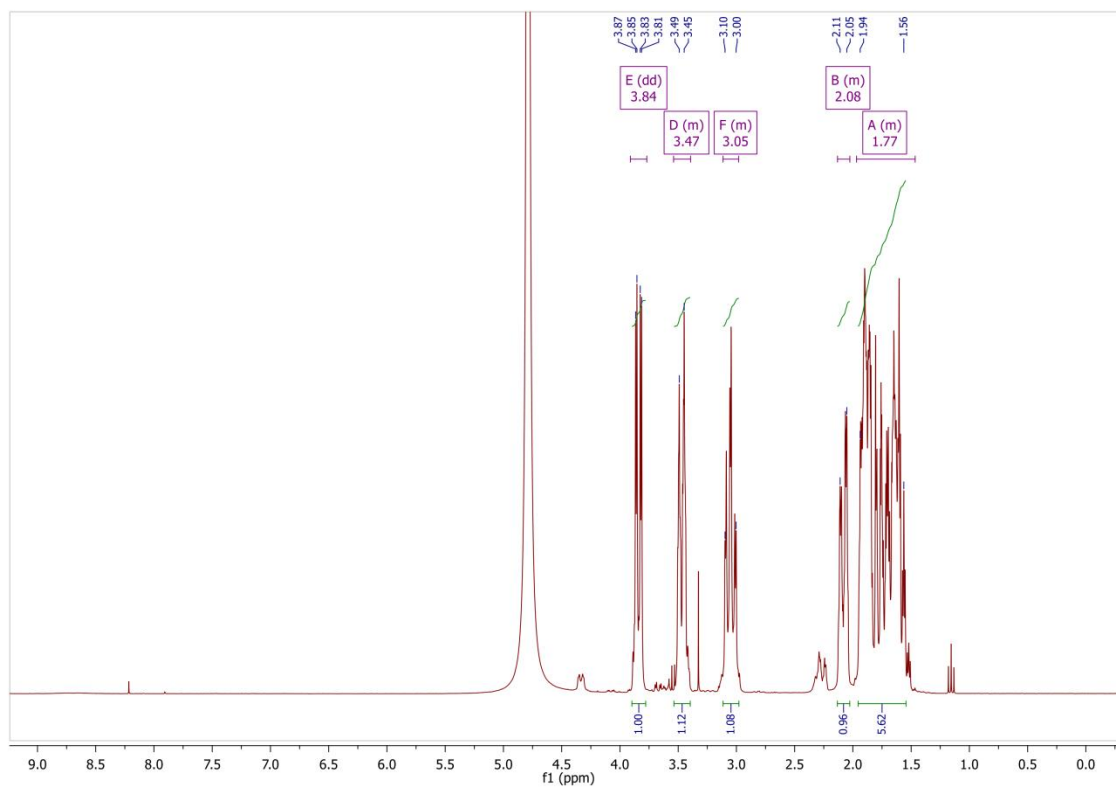

<sup>1</sup>H NMR spectrum of pipecolic acid HA (D<sub>2</sub>O + 1.8% TFA, 300 MHz).

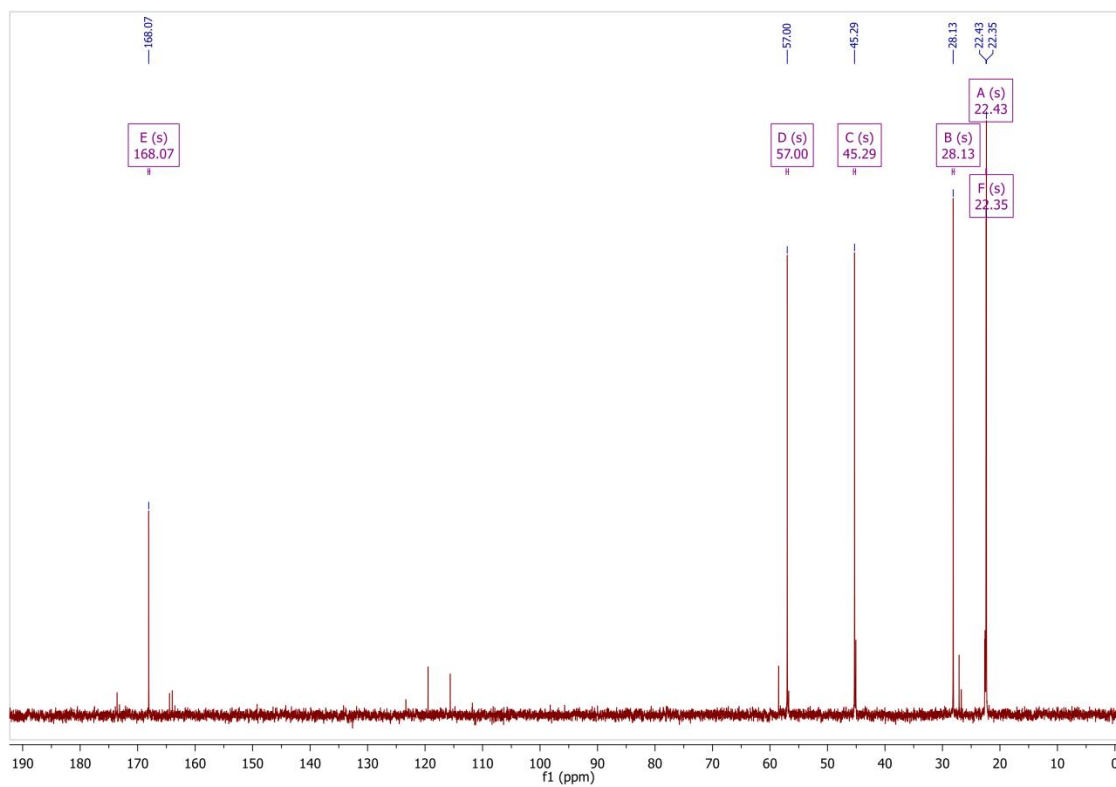

<sup>13</sup>C NMR spectrum of pipecolic acid HA (D<sub>2</sub>O + 1.8% TFA, 75 MHz).



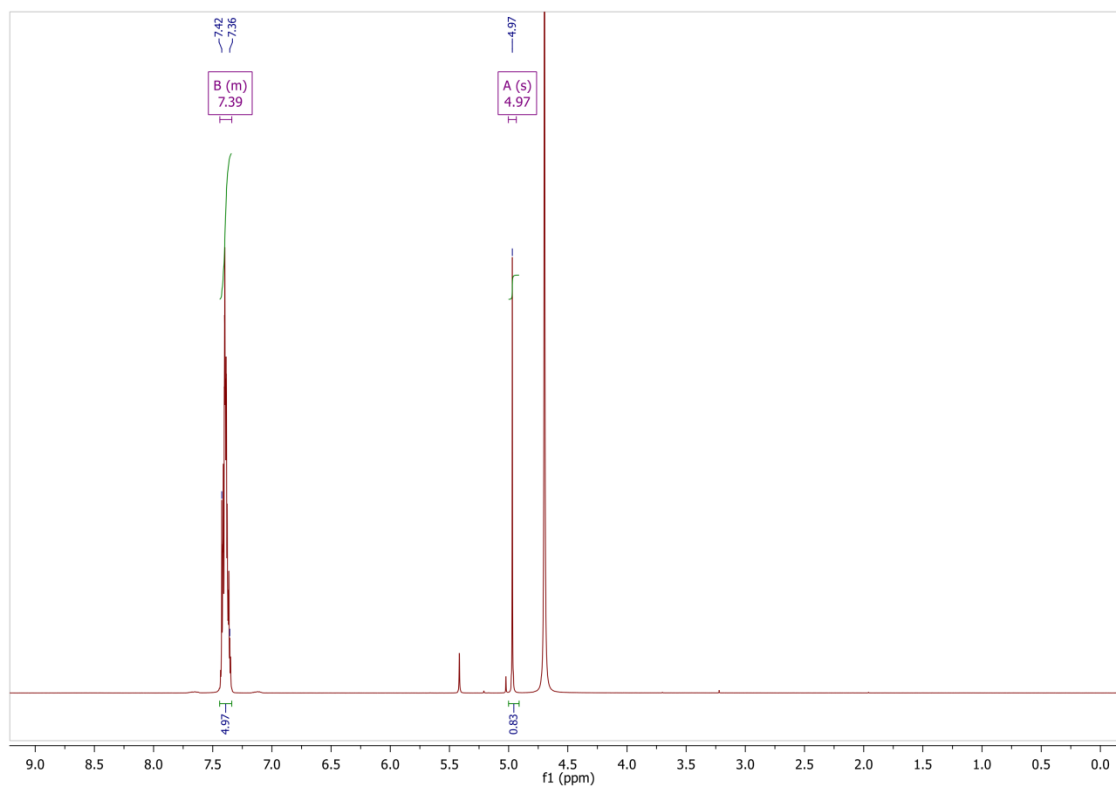

<sup>1</sup>H NMR spectrum of phenylglycine HA (D<sub>2</sub>O + 1.8% TFA, 300 MHz).

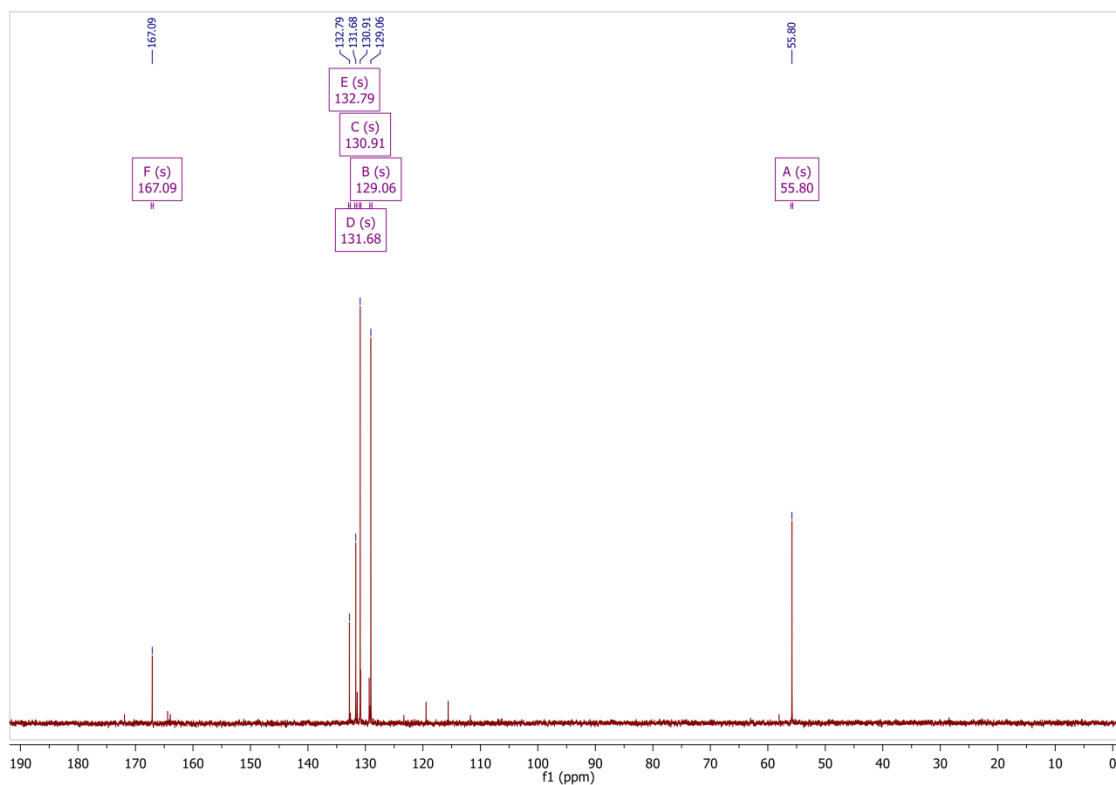

<sup>13</sup>C NMR spectrum of phenylglycine HA (D<sub>2</sub>O + 1.8% TFA, 75 MHz).

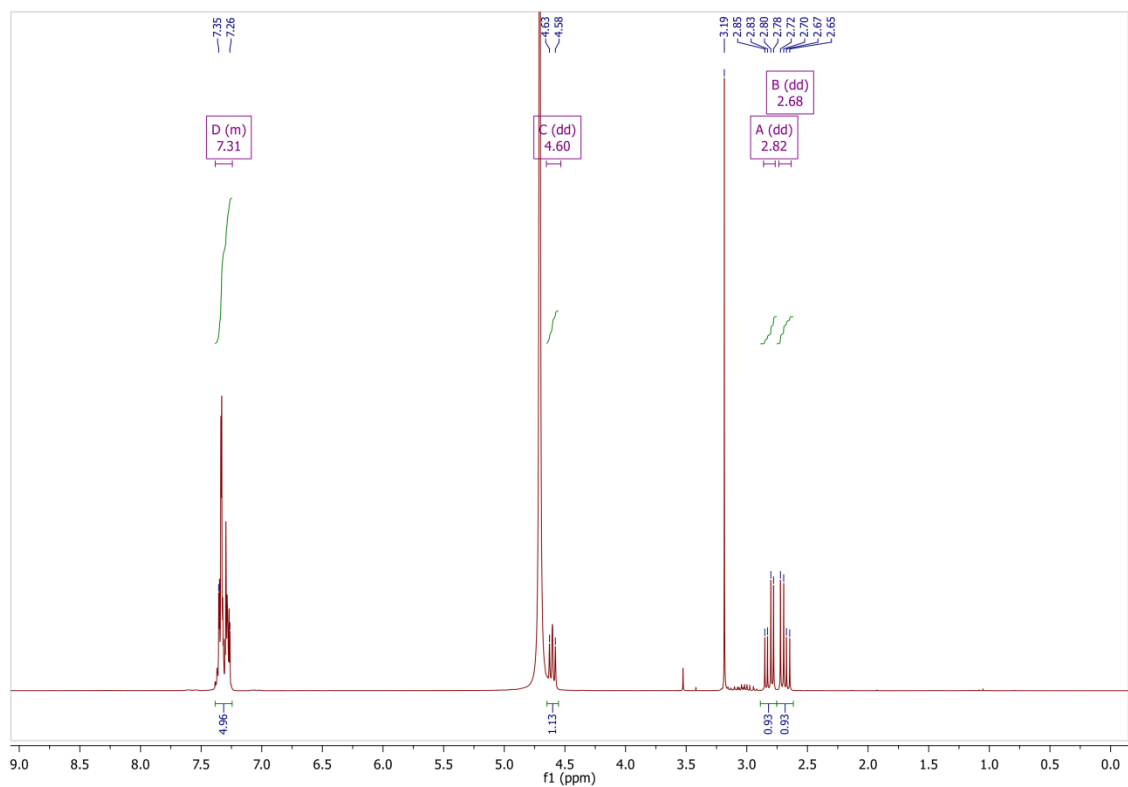

<sup>1</sup>H NMR spectrum of β-phenylalanine HA (D<sub>2</sub>O + 1.8% TFA, 300 MHz).

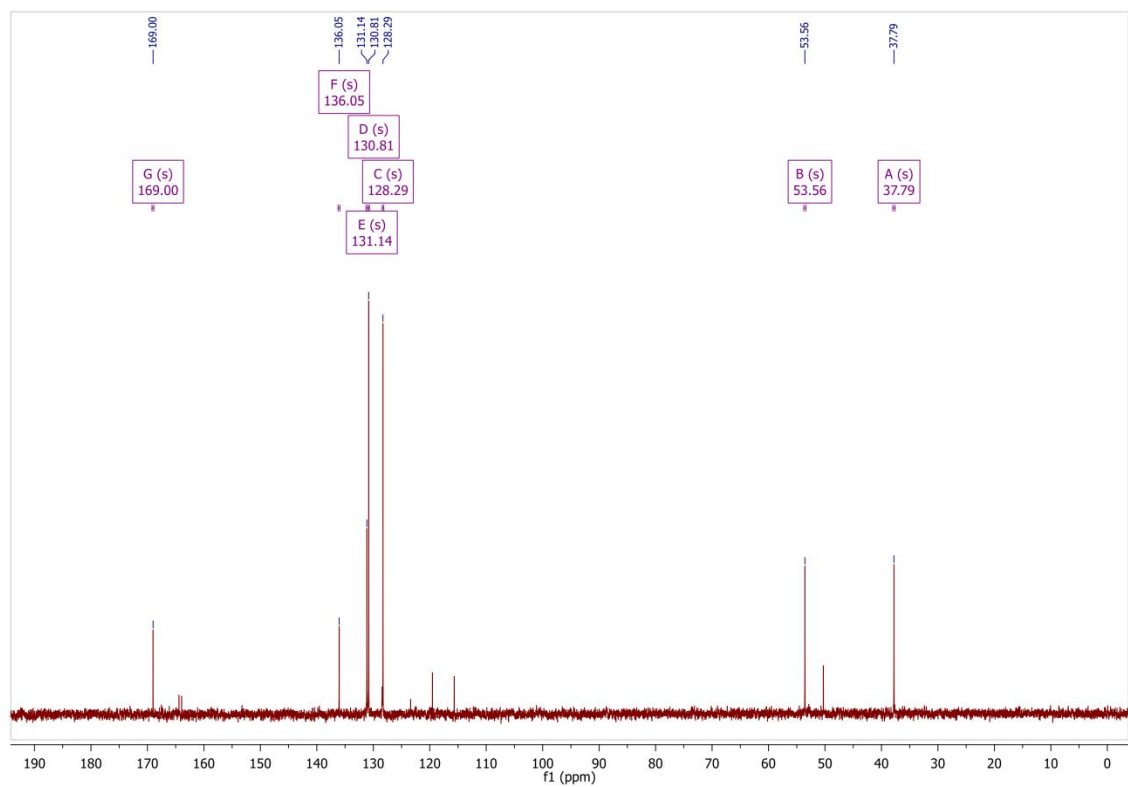

<sup>13</sup>C NMR spectrum of β-phenylalanine HA (D<sub>2</sub>O + 1.8% TFA, 75 MHz).

## 12 Supplementary References

- (1) Cunningham, K. G.; Newbold, G. T.; Spring, F. S.; Stark, J. 449. Hydroxamic Acids. Part II. The Synthesis and Structure of Cyclic Hydroxamic Acids from Pyridine and Quinoline. *J. Chem. Soc.* **1949**, 2091.
- (2) Jankolovits, J.; Lim, C. S.; Mezei, G.; Kampf, J. W.; Pecoraro, V. L. Influencing the Size and Anion Selectivity of Dimeric Ln 3+[15-Metallacrown-5] Compartments through Systematic Variation of the Host Side Chains and Central Metal. *Inorg. Chem.* **2012**, 51 (8), 4527–4538.
- (3) Tegoni, M.; Furlotti, M.; Tropiano, M.; Lim, C. S.; Pecoraro, V. L. Thermodynamics of Core Metal Replacement and Self-Assembly of Ca 2+ 15-Metallacrown-5. *Inorg. Chem.* **2010**, 49 (11), 5190–5201.
- (4) Brown, D. A.; Roche, A. L. Design of Metal Chelates with Biological Activity. 3. Nickel(II) Complexes of Alkyl and Amino Hydroxamic Acids. *Inorg. Chem.* **1983**, 22 (15), 2199–2202.
- (5) Zur, A. A.; Chien, H. C.; Augustyn, E.; Flint, A.; Heeren, N.; Finke, K.; Hernandez, C.; Hansen, L.; Miller, S.; Lin, L.; et al. LAT1 Activity of Carboxylic Acid Bioisosteres: Evaluation of Hydroxamic Acids as Substrates. *Bioorganic Med. Chem. Lett.* **2016**, 26 (20), 5000–5006.
- (6) Hogg, J. H.; Ollmann, I. R.; Haeggström, J. Z.; Wetterholm, A.; Samuelsson, B.; Wong, C.-H. Amino Hydroxamic Acids as Potent Inhibitors of Leukotriene A4 Hydrolase. *Bioorg. Med. Chem.* **1995**, 3 (10), 1405–1415.
- (7) Smissman, E. E.; Warner, V. D. A-Aminohydroxamic Acids as Inhibitors of Histidine Decarboxylase and 3,4-Dihydroxyphenylalanine Decarboxylase. *J. Med. Chem.* **1972**, 15 (6), 681–682.
- (8) Bisswanger, H. *Enzyme Kinetics*; Wiley-VCH Verlag GmbH & Co. KGaA: Weinheim, Germany, 2008.
- (9) Gruenewald, S.; Mootz, H. D.; Stehmeier, P.; Stachelhaus, T. In Vivo Production of Artificial Nonribosomal Peptide Products in the Heterologous Host Escherichia Coli. *Appl. Environ. Microbiol.* **2004**, 70 (6), 3282–3291.
- (10) Pospiech, A.; Neumann, B. A Versatile Quick-Prep of Genomic DNA from Gram-Positive Bacteria. *Trends Genet.* **1995**, 11 (6), 217–218.
- (11) Berrow, N. S.; Alderton, D.; Sainsbury, S.; Nettleship, J.; Assenberg, R.; Rahman, N.; Stuart, D. I.; Owens, R. J. A Versatile Ligation-Independent Cloning Method Suitable for High-Throughput Expression Screening Applications. *Nucleic Acids Res.* **2007**, 35 (6).
- (12) Kries, H.; Niquille, D. L.; Hilvert, D. A Subdomain Swap Strategy for Reengineering Nonribosomal Peptides. *Chem. Biol.* **2015**, 22 (5), 640–648.
- (13) Kries, H.; Wachtel, R.; Pabst, A.; Wanner, B.; Niquille, D.; Hilvert, D. Reprogramming Nonribosomal Peptide Synthetases for “Clickable” Amino Acids. *Angew Chem Int Ed Engl* **2014**, 53 (38), 10105–10108.
- (14) Niquille, D. L.; Hansen, D. A.; Mori, T.; Fercher, D.; Kries, H.; Hilvert, D. Nonribosomal Biosynthesis of Backbone-Modified Peptides. *Nat. Chem.* **2018**, 10 (3), 282–287.
- (15) Arp, J.; Götze, S.; Mukherji, R.; Mattern, D. J.; García-Altares, M.; Klapper, M.; Brock, D. A.; Brakhage, A. A.; Strassmann, J. E.; Queller, D. C.; et al. Synergistic Activity of Cosecreted Natural

Products from Amoebae-Associated Bacteria. *Proc. Natl. Acad. Sci. USA* **2018**, *115* (15), 3758–3763.

- (16) Wilson, D. J.; Aldrich, C. C. A Continuous Kinetic Assay for Adenylation Enzyme Activity and Inhibition. *Anal. Biochem.* **2010**, *404* (1), 56–63.
- (17) R Core Team. R: A Language and Environment for Statistical Computing. *R Foundation for Statistical Computing*. Vienna, Austria 2017.
